# Supplementary material for: A Network-Based Analysis Reveals the Mechanism Underlying Vitamin D in Suppressing Cytokine Storm and Virus in SARS-CoV-2 Infection
Source: Front Immunol. 2020 Dec 9;11:590459. doi: 10.3389/fimmu.2020.590459 (PMC7756074; doi:10.3389/fimmu.2020.590459)
Supplement: Supplementary file 3 [file Table_3.xlsx]

## Sheet: GOTERM_BP_DIRECT
Table S3A: Gene ontology biological processes annotation of up-regulated genes.
Category	Term	Count	%	PValue	Genes	List Total	Pop Hits	Pop Total	Fold Enrichment	Bonferroni	Benjamini	FDR
GOTERM_BP_DIRECT	GO:0006954~inflammatory response	24	26.3736	4.73097e-19	IRAK2, CXCL1, IL6, IL36G, TNF, GBP5, S100A8, CXCL5, C3, CXCL3, S100A9, CXCL2, TLR2, CXCL6, S100A12, CCL20, SERPINA3, VNN1, ZC3H12A, IL1B, TNFAIP3, ADAM8, TNIP1, IL1A	85	379	16792	12.5099	4.6742e-16	4.6742e-16	7.4633e-16
GOTERM_BP_DIRECT	GO:0006955~immune response	22	24.1758	1.16071e-15	CSF3, CXCL1, CSF2, IL6, TNF, CXCL5, C3, CXCL3, CXCL2, OAS3, TLR2, TNFSF14, OAS1, IL32, CXCL6, OAS2, LIF, CCL20, IL1B, LTB, IFI6, IL1A	85	421	16792	10.3234	1.0969e-12	5.4845e-13	1.75415e-12
GOTERM_BP_DIRECT	GO:0060337~type I interferon signaling pathway	12	13.1868	1.49951e-14	IRF9, IFI27, BST2, IFITM1, IRF7, OAS3, OAS1, XAF1, OAS2, MX1, MX2, IFI6	85	64	16792	37.0412	1.48082e-11	4.93605e-12	2.36478e-11
GOTERM_BP_DIRECT	GO:0051607~defense response to virus	11	12.0879	9.429e-09	IRF9, IL6, BST2, IFITM1, OAS3, ZC3H12A, IFI44L, OAS1, OAS2, MX1, MX2	85	165	16792	13.1702	9.31581e-06	2.32896e-06	1.48746e-05
GOTERM_BP_DIRECT	GO:0051092~positive regulation of NF-kappaB transcription factor activity	10	10.989	2.08139e-08	IRAK2, ICAM1, IL6, TNF, S100A8, S100A9, TLR2, IL1B, ADAM8, S100A12	85	133	16792	14.8536	2.05639e-05	4.11282e-06	3.28348e-05
GOTERM_BP_DIRECT	GO:0060326~cell chemotaxis	8	8.79121	3.34769e-08	CXCL1, SAA2, PDGFB, CXCL5, CCL20, CXCL2, HBEGF, CXCL6	85	65	16792	24.3142	3.30746e-05	5.51251e-06	5.28111e-05
GOTERM_BP_DIRECT	GO:0030593~neutrophil chemotaxis	8	8.79121	3.72985e-08	S100A8, CCL20, SAA1, CXCL3, EDN1, S100A9, IL1B, S100A12	85	66	16792	23.9458	3.68502e-05	5.2644e-06	5.88398e-05
GOTERM_BP_DIRECT	GO:0045071~negative regulation of viral genome replication	7	7.69231	4.37922e-08	TNF, BST2, IFITM1, OAS3, OAS1, MX1, TNIP1	85	40	16792	34.5718	4.32658e-05	5.40832e-06	6.90839e-05
GOTERM_BP_DIRECT	GO:0009615~response to virus	9	9.89011	7.56243e-08	TNF, BST2, IFITM1, IRF7, OAS3, OAS1, OAS2, MX1, MX2	85	110	16792	16.1634	7.4714e-05	8.30183e-06	0.0001193
GOTERM_BP_DIRECT	GO:0032496~response to lipopolysaccharide	10	10.989	1.27661e-07	CXCL1, CYP27B1, S100A8, CXCL5, CXCL3, EDN1, CXCL2, TLR2, CXCL6, SOD2	85	164	16792	12.0459	0.000126121	1.26129e-05	0.000201391
GOTERM_BP_DIRECT	GO:0071222~cellular response to lipopolysaccharide	8	8.79121	1.53137e-06	CSF3, CSF2, ICAM1, IL6, TNF, CCL20, ZC3H12A, TNFAIP3	85	113	16792	13.986	0.00151185	0.000137535	0.00241577
GOTERM_BP_DIRECT	GO:0045429~positive regulation of nitric oxide biosynthetic process	6	6.59341	2.30232e-06	ICAM1, IL6, TNF, EDN1, IL1B, SOD2	85	43	16792	27.5655	0.00227211	0.00018954	0.00363194
GOTERM_BP_DIRECT	GO:0007267~cell-cell signaling	10	10.989	4.93065e-06	INHBA, IL36G, CXCL5, BST2, CCL20, EDN1, S100A9, IL1B, CXCL6, LTB	85	254	16792	7.77767	0.00485965	0.00037466	0.00777802
GOTERM_BP_DIRECT	GO:0010628~positive regulation of gene expression	10	10.989	6.33871e-06	CSF2, INHBA, IL6, TNF, PDGFB, C1QTNF1, TLR2, IL1B, ZC3H12A, IL1A	85	262	16792	7.54019	0.00624309	0.000447233	0.0099991
GOTERM_BP_DIRECT	GO:0045087~innate immune response	12	13.1868	9.45298e-06	IL36G, S100A8, PGLYRP4, BST2, SAA1, IRF7, S100A9, TLR2, VNN1, MX1, MX2, S100A12	85	430	16792	5.51311	0.00929611	0.000622446	0.0149114
GOTERM_BP_DIRECT	GO:0006915~apoptotic process	13	14.2857	2.40651e-05	S100A8, MAP3K8, S100A9, C8ORF4, TLR2, IL1B, ZC3H12A, TNFSF14, XAF1, BIRC3, MX1, TNFAIP3, IL1A	85	567	16792	4.52943	0.0234962	0.00148493	0.0379569
GOTERM_BP_DIRECT	GO:0060333~interferon-gamma-mediated signaling pathway	6	6.59341	2.79065e-05	IRF9, ICAM1, IRF7, OAS3, OAS1, OAS2	85	71	16792	16.6946	0.0271954	0.00162057	0.0440145
GOTERM_BP_DIRECT	GO:0070098~chemokine-mediated signaling pathway	6	6.59341	2.79065e-05	CXCL1, CXCL5, CCL20, CXCL3, CXCL2, CXCL6	85	71	16792	16.6946	0.0271954	0.00162057	0.0440145
GOTERM_BP_DIRECT	GO:2001240~negative regulation of extrinsic apoptotic signaling pathway in absence of ligand	5	5.49451	3.39312e-05	CSF2, TNF, IL1B, IL1A, IFI6	85	37	16792	26.6963	0.0329689	0.00186074	0.0535144
GOTERM_BP_DIRECT	GO:0050731~positive regulation of peptidyl-tyrosine phosphorylation	6	6.59341	5.60199e-05	LIF, CSF3, ICAM1, IL6, PDGFB, ITGB3	85	82	16792	14.4551	0.0538453	0.00290888	0.0883371
GOTERM_BP_DIRECT	GO:0051897~positive regulation of protein kinase B signaling	6	6.59341	6.28901e-05	CSF3, IL6, TNF, C1QTNF1, HBEGF, ADAM8	85	84	16792	14.1109	0.0602462	0.00310205	0.0991656
GOTERM_BP_DIRECT	GO:0032755~positive regulation of interleukin-6 production	5	5.49451	7.42532e-05	IL6, TNF, TLR2, IL1B, IL1A	85	45	16792	21.9503	0.0707383	0.00348747	0.117073
GOTERM_BP_DIRECT	GO:0042346~positive regulation of NF-kappaB import into nucleus	4	4.3956	0.000150488	TNF, C8ORF4, TLR2, IL1B	85	21	16792	37.6291	0.138167	0.00673601	0.237138
GOTERM_BP_DIRECT	GO:0008285~negative regulation of cell proliferation	10	10.989	0.000159219	LIF, CXCL1, INHBA, IL6, CYP27B1, IFITM1, TLR2, IL1B, IL1A, SOD2	85	396	16792	4.98871	0.14557	0.00681671	0.250879
GOTERM_BP_DIRECT	GO:0048661~positive regulation of smooth muscle cell proliferation	5	5.49451	0.000229558	IL6, TNF, PDGFB, EDN1, HBEGF	85	60	16792	16.4627	0.202943	0.0094067	0.361524
GOTERM_BP_DIRECT	GO:0045840~positive regulation of mitotic nuclear division	4	4.3956	0.000288924	PDGFB, EDN1, IL1B, IL1A	85	26	16792	30.3928	0.24836	0.011355	0.454818
GOTERM_BP_DIRECT	GO:0006952~defense response	5	5.49451	0.000351371	INHBA, IL32, MX1, TNIP1, MX2	85	67	16792	14.7428	0.293347	0.0132657	0.552865
GOTERM_BP_DIRECT	GO:0006935~chemotaxis	6	6.59341	0.000364057	CXCL1, TYMP, CXCL5, CCL20, CXCL2, CXCL6	85	122	16792	9.71572	0.302152	0.0132359	0.572773
GOTERM_BP_DIRECT	GO:0071347~cellular response to interleukin-1	5	5.49451	0.000438715	ICAM1, IL6, CCL20, EDN1, ZC3H12A	85	71	16792	13.9122	0.351793	0.0153645	0.689851
GOTERM_BP_DIRECT	GO:0050729~positive regulation of inflammatory response	5	5.49451	0.000487739	S100A8, S100A9, TLR2, TNIP1, S100A12	85	73	16792	13.531	0.382456	0.0164835	0.766662
GOTERM_BP_DIRECT	GO:0019221~cytokine-mediated signaling pathway	6	6.59341	0.000504663	CSF3, IL36G, IL6, SOCS3, IL1B, IL1A	85	131	16792	9.04823	0.3927	0.016487	0.793164
GOTERM_BP_DIRECT	GO:0031663~lipopolysaccharide-mediated signaling pathway	4	4.3956	0.000539379	IRAK2, TNF, TLR2, IL1B	85	32	16792	24.6941	0.413188	0.0170482	0.847509
GOTERM_BP_DIRECT	GO:0010888~negative regulation of lipid storage	3	3.2967	0.000678963	IL6, TNF, ITGB3	85	8	16792	74.0824	0.488825	0.0207518	1.06574
GOTERM_BP_DIRECT	GO:0002237~response to molecule of bacterial origin	3	3.2967	0.000870117	CXCL2, TLR2, TNFAIP3	85	9	16792	65.851	0.576859	0.0257254	1.36386
GOTERM_BP_DIRECT	GO:0035456~response to interferon-beta	3	3.2967	0.000870117	BST2, IFITM1, XAF1	85	9	16792	65.851	0.576859	0.0257254	1.36386
GOTERM_BP_DIRECT	GO:0006953~acute-phase response	4	4.3956	0.000969083	IL6, SAA2, SAA1, SERPINA3	85	39	16792	20.2618	0.616309	0.0277809	1.51787
GOTERM_BP_DIRECT	GO:0035455~response to interferon-alpha	3	3.2967	0.00108411	BST2, IFITM1, MX2	85	10	16792	59.2659	0.657569	0.0301555	1.6966
GOTERM_BP_DIRECT	GO:0046888~negative regulation of hormone secretion	3	3.2967	0.00108411	LIF, IL6, EDN1	85	10	16792	59.2659	0.657569	0.0301555	1.6966
GOTERM_BP_DIRECT	GO:0045944~positive regulation of transcription from RNA polymerase II promoter	14	15.3846	0.00111939	CSF3, LIF, INHBA, MAFF, IL6, TNF, HELZ2, IRF7, EDN1, TLR2, ZC3H12A, IL1B, TNIP1, IL1A	85	981	16792	2.81931	0.669311	0.0302707	1.75136
GOTERM_BP_DIRECT	GO:0002548~monocyte chemotaxis	4	4.3956	0.00120425	IL6, PDGFB, CCL20, S100A12	85	42	16792	18.8146	0.695935	0.0316639	1.88294
GOTERM_BP_DIRECT	GO:0002523~leukocyte migration involved in inflammatory response	3	3.2967	0.00132073	S100A8, S100A9, ADAM8	85	11	16792	53.8781	0.729028	0.0337779	2.06329
GOTERM_BP_DIRECT	GO:0002446~neutrophil mediated immunity	3	3.2967	0.00132073	IL6, CXCL5, CXCL6	85	11	16792	53.8781	0.729028	0.0337779	2.06329
GOTERM_BP_DIRECT	GO:0031424~keratinization	4	4.3956	0.00177563	SPRR2D, SPRR2A, SPRR2E, IVL	85	48	16792	16.4627	0.827245	0.0440241	2.76468
GOTERM_BP_DIRECT	GO:0002526~acute inflammatory response	3	3.2967	0.00186089	IL6, S100A8, VNN1	85	13	16792	45.5891	0.841227	0.0449646	2.89562
GOTERM_BP_DIRECT	GO:0018149~peptide cross-linking	4	4.3956	0.00199776	SPRR2D, SPRR2A, SPRR2E, IVL	85	50	16792	15.8042	0.861344	0.0470465	3.10545
GOTERM_BP_DIRECT	GO:0071356~cellular response to tumor necrosis factor	5	5.49451	0.00224934	ICAM1, IL6, CCL20, EDN1, ZC3H12A	85	110	16792	8.97968	0.891916	0.051594	3.49006
GOTERM_BP_DIRECT	GO:0051044~positive regulation of membrane protein ectodomain proteolysis	3	3.2967	0.00248883	TNF, IL1B, ADAM8	85	15	16792	39.5106	0.914739	0.0556482	3.85486
GOTERM_BP_DIRECT	GO:0033209~tumor necrosis factor-mediated signaling pathway	5	5.49451	0.00290105	TNF, TNFSF14, BIRC3, LTB, PSMB9	85	118	16792	8.37089	0.943324	0.063154	4.47973
GOTERM_BP_DIRECT	GO:0032722~positive regulation of chemokine production	3	3.2967	0.00320278	IL6, TNF, TLR2	85	17	16792	34.8623	0.957972	0.0680085	4.9347
GOTERM_BP_DIRECT	GO:0043406~positive regulation of MAP kinase activity	4	4.3956	0.00320824	TNF, PDGFB, EDN1, S100A12	85	59	16792	13.3934	0.958199	0.0666903	4.94292
GOTERM_BP_DIRECT	GO:0002690~positive regulation of leukocyte chemotaxis	3	3.2967	0.00359146	IL6, CXCL5, CXCL6	85	18	16792	32.9255	0.971411	0.0728435	5.51779
GOTERM_BP_DIRECT	GO:0001934~positive regulation of protein phosphorylation	5	5.49451	0.00377676	TNF, C3, MMP9, IL1B, ITGB3	85	127	16792	7.77767	0.97621	0.0749296	5.7946
GOTERM_BP_DIRECT	GO:0033138~positive regulation of peptidyl-serine phosphorylation	4	4.3956	0.00519355	LIF, CSF3, IL6, TNF	85	70	16792	11.2887	0.994169	0.0996681	7.88605
GOTERM_BP_DIRECT	GO:0090023~positive regulation of neutrophil chemotaxis	3	3.2967	0.00535257	CXCL1, CXCL3, CXCL2	85	22	16792	26.939	0.995021	0.100621	8.11806
GOTERM_BP_DIRECT	GO:0001836~release of cytochrome c from mitochondria	3	3.2967	0.00584339	BCL2A1, IFI6, SOD2	85	23	16792	25.7678	0.996943	0.107326	8.83072
GOTERM_BP_DIRECT	GO:0042742~defense response to bacterium	5	5.49451	0.00603373	S100A8, CCL20, S100A9, CXCL6, S100A12	85	145	16792	6.81217	0.99747	0.108623	9.1057
GOTERM_BP_DIRECT	GO:0034341~response to interferon-gamma	3	3.2967	0.00635401	CYP27B1, BST2, IFITM1	85	24	16792	24.6941	0.99816	0.112038	9.56664
GOTERM_BP_DIRECT	GO:0030216~keratinocyte differentiation	4	4.3956	0.00652833	SPRR2D, SPRR2A, SPRR2E, IVL	85	76	16792	10.3975	0.998453	0.112934	9.81659
GOTERM_BP_DIRECT	GO:0050715~positive regulation of cytokine secretion	3	3.2967	0.00688423	TNF, SAA1, IL1A	85	25	16792	23.7064	0.998914	0.116703	10.3249
GOTERM_BP_DIRECT	GO:0032757~positive regulation of interleukin-8 production	3	3.2967	0.00743384	TNF, TLR2, IL1B	85	26	16792	22.7946	0.999371	0.123347	11.1046
GOTERM_BP_DIRECT	GO:0042060~wound healing	4	4.3956	0.00752152	IL6, S100A8, CCL20, ITGB3	85	80	16792	9.87765	0.999424	0.122665	11.2284
GOTERM_BP_DIRECT	GO:0043410~positive regulation of MAPK cascade	4	4.3956	0.00778299	LIF, IL6, PDGFB, C1QTNF1	85	81	16792	9.7557	0.999556	0.124621	11.5966
GOTERM_BP_DIRECT	GO:0010575~positive regulation of vascular endothelial growth factor production	3	3.2967	0.00800264	C3, IL1B, IL1A	85	27	16792	21.9503	0.999643	0.12589	11.9048
GOTERM_BP_DIRECT	GO:0050832~defense response to fungus	3	3.2967	0.00800264	S100A8, S100A9, S100A12	85	27	16792	21.9503	0.999643	0.12589	11.9048
GOTERM_BP_DIRECT	GO:0006919~activation of cysteine-type endopeptidase activity involved in apoptotic process	4	4.3956	0.00832192	IFI27, TNF, S100A8, S100A9	85	83	16792	9.52062	0.99974	0.128559	12.3511
GOTERM_BP_DIRECT	GO:0032715~negative regulation of interleukin-6 production	3	3.2967	0.00859042	TNF, ZC3H12A, TNFAIP3	85	28	16792	21.1664	0.999801	0.130414	12.7247
GOTERM_BP_DIRECT	GO:0048247~lymphocyte chemotaxis	3	3.2967	0.00859042	CCL20, SAA1, ADAM8	85	28	16792	21.1664	0.999801	0.130414	12.7247
GOTERM_BP_DIRECT	GO:0043123~positive regulation of I-kappaB kinase/NF-kappaB signaling	5	5.49451	0.00867311	TNF, BST2, BIRC3, IL1A, S100A12	85	161	16792	6.13518	0.999817	0.129609	12.8395
GOTERM_BP_DIRECT	GO:0008284~positive regulation of cell proliferation	8	8.79121	0.00874912	LIF, CSF3, CSF2, IL6, PDGFB, CXCL5, EDN1, HBEGF	85	466	16792	3.39147	0.99983	0.128738	12.9448
GOTERM_BP_DIRECT	GO:0050830~defense response to Gram-positive bacterium	4	4.3956	0.00888231	IL6, TNF, PGLYRP4, TLR2	85	85	16792	9.29661	0.999852	0.128669	13.1292
GOTERM_BP_DIRECT	GO:0050766~positive regulation of phagocytosis	3	3.2967	0.009197	TNF, C3, IL1B	85	29	16792	20.4365	0.999891	0.131025	13.5633
GOTERM_BP_DIRECT	GO:0010803~regulation of tumor necrosis factor-mediated signaling pathway	3	3.2967	0.00982216	TNF, BIRC3, TNFAIP3	85	30	16792	19.7553	0.999942	0.137363	14.4197
GOTERM_BP_DIRECT	GO:0070488~neutrophil aggregation	2	2.1978	0.00998004	S100A8, S100A9	85	2	16792	197.553	0.99995	0.137489	14.6347
GOTERM_BP_DIRECT	GO:0060700~regulation of ribonuclease activity	2	2.1978	0.00998004	OAS3, OAS1	85	2	16792	197.553	0.99995	0.137489	14.6347
GOTERM_BP_DIRECT	GO:0048285~organelle fission	2	2.1978	0.00998004	MX1, MX2	85	2	16792	197.553	0.99995	0.137489	14.6347
GOTERM_BP_DIRECT	GO:0000165~MAPK cascade	6	6.59341	0.0101066	CSF2, TNF, PDGFB, IL1B, HBEGF, PSMB9	85	262	16792	4.52411	0.999956	0.137215	14.8066
GOTERM_BP_DIRECT	GO:0043200~response to amino acid	3	3.2967	0.0104657	ICAM1, IL6, EDN1	85	31	16792	19.118	0.999969	0.139848	15.2929
GOTERM_BP_DIRECT	GO:0070374~positive regulation of ERK1 and ERK2 cascade	5	5.49451	0.0115235	ICAM1, IL6, TNF, PDGFB, CCL20	85	175	16792	5.64437	0.999989	0.15091	16.7101
GOTERM_BP_DIRECT	GO:0002755~MyD88-dependent toll-like receptor signaling pathway	3	3.2967	0.0118072	IRAK2, TLR2, TNIP1	85	33	16792	17.9594	0.999992	0.152345	17.0865
GOTERM_BP_DIRECT	GO:0097192~extrinsic apoptotic signaling pathway in absence of ligand	3	3.2967	0.0125048	BCL2A1, IL1B, IL1A	85	34	16792	17.4311	0.999996	0.15859	18.005
GOTERM_BP_DIRECT	GO:0050918~positive chemotaxis	3	3.2967	0.01322	SAA2, PDGFB, SAA1	85	35	16792	16.9331	0.999998	0.164827	18.9368
GOTERM_BP_DIRECT	GO:0032602~chemokine production	2	2.1978	0.0149331	S100A8, S100A9	85	3	16792	131.702	1	0.18199	21.1286
GOTERM_BP_DIRECT	GO:0060559~positive regulation of calcidiol 1-monooxygenase activity	2	2.1978	0.0149331	TNF, IL1B	85	3	16792	131.702	1	0.18199	21.1286
GOTERM_BP_DIRECT	GO:0034021~response to silicon dioxide	2	2.1978	0.0149331	CSF2, SOD2	85	3	16792	131.702	1	0.18199	21.1286
GOTERM_BP_DIRECT	GO:0001660~fever generation	2	2.1978	0.0149331	IL1B, IL1A	85	3	16792	131.702	1	0.18199	21.1286
GOTERM_BP_DIRECT	GO:2000391~positive regulation of neutrophil extravasation	2	2.1978	0.0149331	ADAM8, IL1A	85	3	16792	131.702	1	0.18199	21.1286
GOTERM_BP_DIRECT	GO:2000116~regulation of cysteine-type endopeptidase activity	2	2.1978	0.0149331	BIRC3, PSMB9	85	3	16792	131.702	1	0.18199	21.1286
GOTERM_BP_DIRECT	GO:0042517~positive regulation of tyrosine phosphorylation of Stat3 protein	3	3.2967	0.0154694	LIF, IL6, SOCS3	85	38	16792	15.5963	1	0.185659	21.8034
GOTERM_BP_DIRECT	GO:0051091~positive regulation of sequence-specific DNA binding transcription factor activity	4	4.3956	0.0157006	IL6, TNF, EDN1, IL1B	85	105	16792	7.52583	1	0.185945	22.0926
GOTERM_BP_DIRECT	GO:0000187~activation of MAPK activity	4	4.3956	0.0165065	IRAK2, TNF, SAA1, IL1B	85	107	16792	7.38516	1	0.192301	23.0927
GOTERM_BP_DIRECT	GO:0043124~negative regulation of I-kappaB kinase/NF-kappaB signaling	3	3.2967	0.0170537	ZC3H12A, TNFAIP3, TNIP1	85	40	16792	14.8165	1	0.195776	23.765
GOTERM_BP_DIRECT	GO:0045599~negative regulation of fat cell differentiation	3	3.2967	0.0187041	IL6, TNF, SOD2	85	42	16792	14.1109	1	0.210325	25.7593
GOTERM_BP_DIRECT	GO:0045740~positive regulation of DNA replication	3	3.2967	0.0187041	CSF2, IL6, PDGFB	85	42	16792	14.1109	1	0.210325	25.7593
GOTERM_BP_DIRECT	GO:0007566~embryo implantation	3	3.2967	0.0187041	LIF, MMP9, IL1B	85	42	16792	14.1109	1	0.210325	25.7593
GOTERM_BP_DIRECT	GO:0045785~positive regulation of cell adhesion	3	3.2967	0.0195535	TNF, SAA1, ADAM8	85	43	16792	13.7828	1	0.216417	26.7667
GOTERM_BP_DIRECT	GO:0002793~positive regulation of peptide secretion	2	2.1978	0.0198616	S100A8, S100A9	85	4	16792	98.7765	1	0.217062	27.129
GOTERM_BP_DIRECT	GO:0060708~spongiotrophoblast differentiation	2	2.1978	0.0198616	LIF, SOCS3	85	4	16792	98.7765	1	0.217062	27.129
GOTERM_BP_DIRECT	GO:0001821~histamine secretion	2	2.1978	0.0198616	CSF2, EDN1	85	4	16792	98.7765	1	0.217062	27.129
GOTERM_BP_DIRECT	GO:0032119~sequestering of zinc ion	2	2.1978	0.0198616	S100A8, S100A9	85	4	16792	98.7765	1	0.217062	27.129
GOTERM_BP_DIRECT	GO:0030730~sequestering of triglyceride	2	2.1978	0.0198616	TNF, IL1B	85	4	16792	98.7765	1	0.217062	27.129
GOTERM_BP_DIRECT	GO:0045766~positive regulation of angiogenesis	4	4.3956	0.0199593	C3, IL1B, ZC3H12A, IL1A	85	115	16792	6.87141	1	0.215664	27.2434
GOTERM_BP_DIRECT	GO:0010595~positive regulation of endothelial cell migration	3	3.2967	0.022197	EDN1, ZC3H12A, ITGB3	85	46	16792	12.8839	1	0.234481	29.8204
GOTERM_BP_DIRECT	GO:0010951~negative regulation of endopeptidase activity	4	4.3956	0.0227907	BST2, C3, PI3, SERPINA3	85	121	16792	6.53068	1	0.237508	30.4895
GOTERM_BP_DIRECT	GO:0008630~intrinsic apoptotic signaling pathway in response to DNA damage	3	3.2967	0.0231093	TNF, BCL2A1, SOD2	85	47	16792	12.6098	1	0.237966	30.8462
GOTERM_BP_DIRECT	GO:0051781~positive regulation of cell division	3	3.2967	0.0231093	PDGFB, IL1B, IL1A	85	47	16792	12.6098	1	0.237966	30.8462
GOTERM_BP_DIRECT	GO:0031622~positive regulation of fever generation	2	2.1978	0.0247658	TNF, IL1B	85	5	16792	79.0212	1	0.250315	32.6731
GOTERM_BP_DIRECT	GO:0007165~signal transduction	12	13.1868	0.0295608	CXCL1, CXCL5, CCL20, C3, S100A9, TLR2, IL1B, HBEGF, TNFSF14, CXCL6, MX1, LTB	85	1161	16792	2.04189	1	0.288773	37.7097
GOTERM_BP_DIRECT	GO:0060664~epithelial cell proliferation involved in salivary gland morphogenesis	2	2.1978	0.0296458	IL6, TNF	85	6	16792	65.851	1	0.286715	37.7957
GOTERM_BP_DIRECT	GO:0042045~epithelial fluid transport	2	2.1978	0.0296458	CSF2, EDN1	85	6	16792	65.851	1	0.286715	37.7957
GOTERM_BP_DIRECT	GO:0016049~cell growth	3	3.2967	0.0319866	IL6, EDN1, ITGB3	85	56	16792	10.5832	1	0.302944	40.1212
GOTERM_BP_DIRECT	GO:0071346~cellular response to interferon-gamma	3	3.2967	0.033044	GBP5, CCL20, EDN1	85	57	16792	10.3975	1	0.30849	41.1447
GOTERM_BP_DIRECT	GO:0006959~humoral immune response	3	3.2967	0.033044	IL6, TNF, BST2	85	57	16792	10.3975	1	0.30849	41.1447
GOTERM_BP_DIRECT	GO:0051259~protein oligomerization	3	3.2967	0.034115	ZC3H12A, OAS1, TNFAIP3	85	58	16792	10.2183	1	0.313986	42.1647
GOTERM_BP_DIRECT	GO:0032308~positive regulation of prostaglandin secretion	2	2.1978	0.0345016	EDN1, IL1B	85	7	16792	56.4437	1	0.314125	42.5289
GOTERM_BP_DIRECT	GO:0071639~positive regulation of monocyte chemotactic protein-1 production	2	2.1978	0.0345016	IL1B, IL1A	85	7	16792	56.4437	1	0.314125	42.5289
GOTERM_BP_DIRECT	GO:0051549~positive regulation of keratinocyte migration	2	2.1978	0.0345016	MMP9, HBEGF	85	7	16792	56.4437	1	0.314125	42.5289
GOTERM_BP_DIRECT	GO:1903140~regulation of establishment of endothelial barrier	2	2.1978	0.0345016	TNF, IL1B	85	7	16792	56.4437	1	0.314125	42.5289
GOTERM_BP_DIRECT	GO:0071407~cellular response to organic cyclic compound	3	3.2967	0.0351994	P2RY6, TNF, IL1B	85	59	16792	10.0451	1	0.316608	43.1807
GOTERM_BP_DIRECT	GO:0007249~I-kappaB kinase/NF-kappaB signaling	3	3.2967	0.0362972	IRAK2, TNF, BIRC3	85	60	16792	9.87765	1	0.321996	44.192
GOTERM_BP_DIRECT	GO:0006508~proteolysis	7	7.69231	0.0391802	PLAT, C3, CFB, MMP9, ADAM8, MMP13, TNIP1	85	500	16792	2.76574	1	0.340103	46.7683
GOTERM_BP_DIRECT	GO:0010544~negative regulation of platelet activation	2	2.1978	0.0393334	PDGFB, C1QTNF1	85	8	16792	49.3882	1	0.338326	46.9021
GOTERM_BP_DIRECT	GO:0014909~smooth muscle cell migration	2	2.1978	0.0393334	PLAT, ITGB3	85	8	16792	49.3882	1	0.338326	46.9021
GOTERM_BP_DIRECT	GO:0035234~ectopic germ cell programmed cell death	2	2.1978	0.0393334	IL1B, IL1A	85	8	16792	49.3882	1	0.338326	46.9021
GOTERM_BP_DIRECT	GO:0050727~regulation of inflammatory response	3	3.2967	0.0396686	BIRC3, TNFAIP3, TNIP1	85	63	16792	9.40728	1	0.337861	47.1936
GOTERM_BP_DIRECT	GO:0018108~peptidyl-tyrosine phosphorylation	4	4.3956	0.041381	CSF2, PDGFB, STAT5A, HBEGF	85	153	16792	5.16478	1	0.346927	48.6596
GOTERM_BP_DIRECT	GO:0046330~positive regulation of JNK cascade	3	3.2967	0.0419798	TNF, IL1B, IL1A	85	65	16792	9.11783	1	0.348187	49.1632
GOTERM_BP_DIRECT	GO:0002544~chronic inflammatory response	2	2.1978	0.0441413	S100A8, VNN1	85	9	16792	43.9007	1	0.359838	50.9428
GOTERM_BP_DIRECT	GO:0071223~cellular response to lipoteichoic acid	2	2.1978	0.0441413	CCL20, TLR2	85	9	16792	43.9007	1	0.359838	50.9428
GOTERM_BP_DIRECT	GO:0043154~negative regulation of cysteine-type endopeptidase activity involved in apoptotic process	3	3.2967	0.0467495	IL6, TNFSF14, IFI6	85	69	16792	8.58926	1	0.373963	53.0124
GOTERM_BP_DIRECT	GO:0001938~positive regulation of endothelial cell proliferation	3	3.2967	0.0467495	PDGFB, STAT5A, ITGB3	85	69	16792	8.58926	1	0.373963	53.0124
GOTERM_BP_DIRECT	GO:0007166~cell surface receptor signaling pathway	5	5.49451	0.0485666	IRF9, INHBA, IFITM1, EDN1, BIRC3	85	274	16792	3.60498	1	0.382599	54.4057
GOTERM_BP_DIRECT	GO:0045080~positive regulation of chemokine biosynthetic process	2	2.1978	0.0489255	TNF, IL1B	85	10	16792	39.5106	1	0.381942	54.6762
GOTERM_BP_DIRECT	GO:0010884~positive regulation of lipid storage	2	2.1978	0.0489255	C3, ZC3H12A	85	10	16792	39.5106	1	0.381942	54.6762
GOTERM_BP_DIRECT	GO:0071803~positive regulation of podosome assembly	2	2.1978	0.0489255	CSF2, TNF	85	10	16792	39.5106	1	0.381942	54.6762
GOTERM_BP_DIRECT	GO:0002675~positive regulation of acute inflammatory response	2	2.1978	0.0489255	IL6, ADAM8	85	10	16792	39.5106	1	0.381942	54.6762
GOTERM_BP_DIRECT	GO:0033089~positive regulation of T cell differentiation in thymus	2	2.1978	0.0489255	VNN1, ADAM8	85	10	16792	39.5106	1	0.381942	54.6762
GOTERM_BP_DIRECT	GO:0032088~negative regulation of NF-kappaB transcription factor activity	3	3.2967	0.0492056	IRAK2, ZC3H12A, TNFAIP3	85	71	16792	8.34731	1	0.380811	54.8864
GOTERM_BP_DIRECT	GO:0048333~mesodermal cell differentiation	2	2.1978	0.0536859	INHBA, ITGB3	85	11	16792	35.9187	1	0.405018	58.1257
GOTERM_BP_DIRECT	GO:0034116~positive regulation of heterotypic cell-cell adhesion	2	2.1978	0.0536859	TNF, IL1B	85	11	16792	35.9187	1	0.405018	58.1257
GOTERM_BP_DIRECT	GO:0022617~extracellular matrix disassembly	3	3.2967	0.0555444	MMP9, ADAM8, MMP13	85	76	16792	7.79814	1	0.412952	59.4044
GOTERM_BP_DIRECT	GO:0045086~positive regulation of interleukin-2 biosynthetic process	2	2.1978	0.0584229	IL1B, IL1A	85	12	16792	32.9255	1	0.426419	61.3129
GOTERM_BP_DIRECT	GO:0031669~cellular response to nutrient levels	2	2.1978	0.0584229	ICAM1, IL6	85	12	16792	32.9255	1	0.426419	61.3129
GOTERM_BP_DIRECT	GO:0045779~negative regulation of bone resorption	2	2.1978	0.0584229	IL6, TNFAIP3	85	12	16792	32.9255	1	0.426419	61.3129
GOTERM_BP_DIRECT	GO:0060707~trophoblast giant cell differentiation	2	2.1978	0.0584229	LIF, SOCS3	85	12	16792	32.9255	1	0.426419	61.3129
GOTERM_BP_DIRECT	GO:0006164~purine nucleotide biosynthetic process	2	2.1978	0.0584229	OAS1, OAS2	85	12	16792	32.9255	1	0.426419	61.3129
GOTERM_BP_DIRECT	GO:0050728~negative regulation of inflammatory response	3	3.2967	0.0594783	SOCS3, SAA1, TNFAIP3	85	79	16792	7.50201	1	0.429344	61.9913
GOTERM_BP_DIRECT	GO:0050776~regulation of immune response	4	4.3956	0.05987	ICAM1, IFITM1, C3, IRF7	85	178	16792	4.43939	1	0.428562	62.2403
GOTERM_BP_DIRECT	GO:0051770~positive regulation of nitric-oxide synthase biosynthetic process	2	2.1978	0.0631364	CCL20, TLR2	85	13	16792	30.3928	1	0.443324	64.2576
GOTERM_BP_DIRECT	GO:0006957~complement activation, alternative pathway	2	2.1978	0.0631364	C3, CFB	85	13	16792	30.3928	1	0.443324	64.2576
GOTERM_BP_DIRECT	GO:0042127~regulation of cell proliferation	4	4.3956	0.0656372	TNF, CXCL3, CXCL2, CXCL6	85	185	16792	4.27141	1	0.453536	65.7334
GOTERM_BP_DIRECT	GO:0030307~positive regulation of cell growth	3	3.2967	0.0662405	S100A8, S100A9, HBEGF	85	84	16792	7.05546	1	0.453701	66.0808
GOTERM_BP_DIRECT	GO:0008544~epidermis development	3	3.2967	0.0676226	SPRR2D, SPRR2A, SPRR2E	85	85	16792	6.97246	1	0.457837	66.8642
GOTERM_BP_DIRECT	GO:0042554~superoxide anion generation	2	2.1978	0.0678265	EDN1, SOD2	85	14	16792	28.2218	1	0.455951	66.9783
GOTERM_BP_DIRECT	GO:1902176~negative regulation of oxidative stress-induced intrinsic apoptotic signaling pathway	2	2.1978	0.0678265	VNN1, SOD2	85	14	16792	28.2218	1	0.455951	66.9783
GOTERM_BP_DIRECT	GO:0070498~interleukin-1-mediated signaling pathway	2	2.1978	0.0678265	IRAK2, IL1A	85	14	16792	28.2218	1	0.455951	66.9783
GOTERM_BP_DIRECT	GO:0046688~response to copper ion	2	2.1978	0.0724935	ICAM1, IL1A	85	15	16792	26.3404	1	0.476146	69.4921
GOTERM_BP_DIRECT	GO:0033627~cell adhesion mediated by integrin	2	2.1978	0.0724935	ICAM1, ITGB3	85	15	16792	26.3404	1	0.476146	69.4921
GOTERM_BP_DIRECT	GO:0043122~regulation of I-kappaB kinase/NF-kappaB signaling	2	2.1978	0.0724935	TNF, IL1B	85	15	16792	26.3404	1	0.476146	69.4921
GOTERM_BP_DIRECT	GO:1904707~positive regulation of vascular smooth muscle cell proliferation	2	2.1978	0.0724935	PDGFB, MMP9	85	15	16792	26.3404	1	0.476146	69.4921
GOTERM_BP_DIRECT	GO:0030198~extracellular matrix organization	4	4.3956	0.0751954	ICAM1, TNF, PDGFB, ITGB3	85	196	16792	4.03169	1	0.486147	70.8644
GOTERM_BP_DIRECT	GO:0050995~negative regulation of lipid catabolic process	2	2.1978	0.0771374	TNF, IL1B	85	16	16792	24.6941	1	0.492306	71.8147
GOTERM_BP_DIRECT	GO:0014002~astrocyte development	2	2.1978	0.0771374	S100A8, S100A9	85	16	16792	24.6941	1	0.492306	71.8147
GOTERM_BP_DIRECT	GO:0030949~positive regulation of vascular endothelial growth factor receptor signaling pathway	2	2.1978	0.0771374	IL1B, ITGB3	85	16	16792	24.6941	1	0.492306	71.8147
GOTERM_BP_DIRECT	GO:0006885~regulation of pH	2	2.1978	0.0771374	RHCG, EDN1	85	16	16792	24.6941	1	0.492306	71.8147
GOTERM_BP_DIRECT	GO:0043066~negative regulation of apoptotic process	6	6.59341	0.0777525	IL6, SOCS3, MMP9, BCL2A1, BIRC3, SOD2	85	455	16792	2.60509	1	0.492224	72.1096
GOTERM_BP_DIRECT	GO:0007186~G-protein coupled receptor signaling pathway	9	9.89011	0.0801631	CXCL1, CXCL5, CCL20, C3, CXCL3, EDN1, MRGPRX3, CXCL2, CXCL6	85	899	16792	1.97773	1	0.500301	73.2377
GOTERM_BP_DIRECT	GO:0071456~cellular response to hypoxia	3	3.2967	0.0834313	ICAM1, EDN1, ADAM8	85	96	16792	6.17353	1	0.511919	74.699
GOTERM_BP_DIRECT	GO:0043536~positive regulation of blood vessel endothelial cell migration	2	2.1978	0.0909317	PDGFB, STAT5A	85	19	16792	20.795	1	0.540877	77.7749
GOTERM_BP_DIRECT	GO:0051493~regulation of cytoskeleton organization	2	2.1978	0.0909317	S100A8, S100A9	85	19	16792	20.795	1	0.540877	77.7749
GOTERM_BP_DIRECT	GO:0016337~single organismal cell-cell adhesion	3	3.2967	0.0909562	ICAM1, VNN1, ADAM8	85	101	16792	5.86791	1	0.53804	77.7844
GOTERM_BP_DIRECT	GO:0002576~platelet degranulation	3	3.2967	0.0940206	PDGFB, SERPINA3, ITGB3	85	103	16792	5.75397	1	0.547569	78.9368
GOTERM_BP_DIRECT	GO:0001892~embryonic placenta development	2	2.1978	0.0954843	CSF2, PDGFB	85	20	16792	19.7553	1	0.550495	79.4673
GOTERM_BP_DIRECT	GO:0046697~decidualization	2	2.1978	0.0954843	LIF, CYP27B1	85	20	16792	19.7553	1	0.550495	79.4673
GOTERM_BP_DIRECT	GO:0014911~positive regulation of smooth muscle cell migration	2	2.1978	0.0954843	P2RY6, PDGFB	85	20	16792	19.7553	1	0.550495	79.4673
GOTERM_BP_DIRECT	GO:0045471~response to ethanol	3	3.2967	0.0971148	CSF3, ICAM1, S100A8	85	105	16792	5.64437	1	0.554016	80.0434

## Sheet: GOTERM_MF_DIRECT
Table S3B: Gene ontology molecular function annotation of up-regulated genes.
Category	Term	Count	%	PValue	Genes	List Total	Pop Hits	Pop Total	Fold Enrichment	Bonferroni	Benjamini	FDR
GOTERM_MF_DIRECT	GO:0005125~cytokine activity	13	14.2857	8.85634e-11	CSF3, CSF2, IL6, IL36G, TNF, EDN1, TNFSF14, IL32, LIF, INHBA, IL1B, LTB, IL1A	87	176	16881	14.3321	1.43473e-08	1.43473e-08	1.07166e-07
GOTERM_MF_DIRECT	GO:0045236~CXCR chemokine receptor binding	5	5.49451	7.75804e-08	CXCL1, CXCL5, CXCL3, CXCL2, CXCL6	87	9	16881	107.797	1.25679e-05	6.28399e-06	9.38761e-05
GOTERM_MF_DIRECT	GO:0008083~growth factor activity	9	9.89011	1.70136e-06	LIF, CXCL1, CSF3, CSF2, INHBA, TYMP, IL6, PDGFB, HBEGF	87	162	16881	10.7797	0.000275583	9.18695e-05	0.00205872
GOTERM_MF_DIRECT	GO:0008009~chemokine activity	6	6.59341	4.87757e-06	CXCL1, CXCL5, CCL20, CXCL3, CXCL2, CXCL6	87	49	16881	23.7593	0.000789855	0.000197522	0.00590194
GOTERM_MF_DIRECT	GO:0001730~2'-5'-oligoadenylate synthetase activity	3	3.2967	0.000152902	OAS3, OAS1, OAS2	87	4	16881	145.526	0.0244676	0.00494214	0.184862
GOTERM_MF_DIRECT	GO:0050786~RAGE receptor binding	3	3.2967	0.00136943	S100A8, S100A9, S100A12	87	11	16881	52.9185	0.199084	0.0363238	1.64454
GOTERM_MF_DIRECT	GO:0005149~interleukin-1 receptor binding	3	3.2967	0.00192928	IL36G, IL1B, IL1A	87	13	16881	44.7772	0.268637	0.0437082	2.30969
GOTERM_MF_DIRECT	GO:0005518~collagen binding	4	4.3956	0.00354334	PDGFB, MMP9, C1QTNF1, MMP13	87	60	16881	12.9356	0.437318	0.0693575	4.2043
GOTERM_MF_DIRECT	GO:0042056~chemoattractant activity	3	3.2967	0.00828962	SAA2, PDGFB, SAA1	87	27	16881	21.5594	0.740375	0.13915	9.58198
GOTERM_MF_DIRECT	GO:0016779~nucleotidyltransferase activity	3	3.2967	0.00828962	OAS3, OAS1, OAS2	87	27	16881	21.5594	0.740375	0.13915	9.58198
GOTERM_MF_DIRECT	GO:0005198~structural molecule activity	6	6.59341	0.0085805	SPRR2D, SPRR2A, SPRR2E, KRT4, IVL, KRT24	87	247	16881	4.71339	0.752424	0.130297	9.90237
GOTERM_MF_DIRECT	GO:0005102~receptor binding	7	7.69231	0.00927571	LIF, PLAT, CXCL1, RND1, C3, TNFSF14, LTB	87	353	16881	3.84771	0.779019	0.128242	10.6639
GOTERM_MF_DIRECT	GO:0005164~tumor necrosis factor receptor binding	3	3.2967	0.00952565	TNF, TNFSF14, LTB	87	29	16881	20.0725	0.787869	0.121213	10.9362
GOTERM_MF_DIRECT	GO:0004252~serine-type endopeptidase activity	6	6.59341	0.00976416	PLAT, C3, CFB, MMP9, ADAM8, MMP13	87	255	16881	4.56552	0.795986	0.115094	11.1954
GOTERM_MF_DIRECT	GO:0016740~transferase activity	4	4.3956	0.0129788	OAS3, OAS1, OAS2, BIRC3	87	96	16881	8.08477	0.879528	0.140296	14.6217
GOTERM_MF_DIRECT	GO:0005515~protein binding	56	61.5385	0.0169574	S100A8, PDGFB, HELZ2, MMP9, STAT5A, S100A9, EDN1, TLR2, TNFSF14, MAP3K8, C8ORF4, SERPINA3, MX1, ADAM8, TNIP1, MX2, IL1A, IRAK2, ICAM1, GBP5, BST2, SOCS3, BCL2A1, INHBA, FAM167A, RND1, TNFAIP3, TRIML2, CSF2, TNF, KRT6B, IFITM1, C3, CXCL2, OAS3, IL32, OAS1, SPRR2E, ITGB3, OAS2, LIF, P2RY6, CCL20, SPRR2A, C1QTNF1, ZC3H12A, KRT4, IVL, PLAT, IL6, BIRC3, S100A12, PSMB9, IRF9, IRF7, IFI6	87	8785	16881	1.23687	0.937379	0.168655	18.6942
GOTERM_MF_DIRECT	GO:0035662~Toll-like receptor 4 binding	2	2.1978	0.0202245	S100A8, S100A9	87	4	16881	97.0172	0.963482	0.186877	21.9043
GOTERM_MF_DIRECT	GO:0050544~arachidonic acid binding	2	2.1978	0.0252172	S100A8, S100A9	87	5	16881	77.6138	0.984038	0.216032	26.5859
GOTERM_MF_DIRECT	GO:0005507~copper ion binding	3	3.2967	0.033076	HEPHL1, IL1A, S100A12	87	56	16881	10.3947	0.995699	0.261193	33.4359
GOTERM_MF_DIRECT	GO:0008270~zinc ion binding	12	13.1868	0.0347459	S100A8, PGLYRP4, MMP9, S100A9, OAS1, XAF1, OAS2, BIRC3, TNFAIP3, ADAM8, MMP13, S100A12	87	1169	16881	1.9918	0.99675	0.26031	34.8137
GOTERM_MF_DIRECT	GO:0042802~identical protein binding	9	9.89011	0.0368402	INHBA, TNF, GBP5, PDGFB, MMP9, ITGB3, TNFAIP3, TNIP1, SOD2	87	749	16881	2.33152	0.997714	0.26217	36.5047
GOTERM_MF_DIRECT	GO:0003725~double-stranded RNA binding	3	3.2967	0.0386706	OAS3, OAS1, OAS2	87	61	16881	9.54268	0.99832	0.262314	37.9495
GOTERM_MF_DIRECT	GO:0000975~regulatory region DNA binding	2	2.1978	0.0594685	IRF9, IRF7	87	12	16881	32.3391	0.999951	0.363305	52.3784
GOTERM_MF_DIRECT	GO:0042834~peptidoglycan binding	2	2.1978	0.0594685	PGLYRP4, TLR2	87	12	16881	32.3391	0.999951	0.363305	52.3784
GOTERM_MF_DIRECT	GO:0004843~thiol-dependent ubiquitin-specific protease activity	3	3.2967	0.0627931	ZC3H12A, TNFAIP3, TNIP1	87	80	16881	7.27629	0.999973	0.366679	54.3758
GOTERM_MF_DIRECT	GO:0005161~platelet-derived growth factor receptor binding	2	2.1978	0.0737809	PDGFB, ITGB3	87	15	16881	25.8713	0.999996	0.403902	60.4433
GOTERM_MF_DIRECT	GO:0008017~microtubule binding	4	4.3956	0.0899818	S100A8, S100A9, MX1, MX2	87	208	16881	3.73143	1	0.457194	68.0489
GOTERM_MF_DIRECT	GO:0002020~protease binding	3	3.2967	0.0938084	TNF, ITGB3, TNFAIP3	87	101	16881	5.7634	1	0.458688	69.6372

## Sheet: GOTERM_CC_DIRECT
Table S3C: Gene ontology cellular component annotation of up-regulated genes.
Category	Term	Count	%	PValue	Genes	List Total	Pop Hits	Pop Total	Fold Enrichment	Bonferroni	Benjamini	FDR
GOTERM_CC_DIRECT	GO:0005615~extracellular space	34	37.3626	2.61618e-16	CSF3, CXCL1, CSF2, IL36G, TNF, S100A8, PDGFB, CXCL5, C3, MMP9, CXCL3, S100A9, EDN1, CXCL2, OAS3, TNFSF14, IL32, CXCL6, LIF, CCL20, SAA2, SAA1, C1QTNF1, SERPINA3, IL1B, LTB, IL1A, PLAT, ICAM1, IL6, CFB, MMP13, HBEGF, TNFAIP2	86	1347	18224	5.3488	2.33147e-14	2.33147e-14	2.44249e-13
GOTERM_CC_DIRECT	GO:0005576~extracellular region	31	34.0659	1.27812e-11	CSF3, CXCL1, CSF2, IL36G, TNF, S100A8, PDGFB, CXCL5, C3, MMP9, CXCL3, S100A9, EDN1, CXCL2, OAS1, CXCL6, LIF, PGLYRP4, CCL20, SAA1, C1QTNF1, SERPINA3, IL1B, IL1A, PLAT, IL6, CFB, MMP13, S100A12, INHBA, HBEGF	86	1610	18224	4.0802	1.34203e-09	6.71014e-10	1.43166e-08
GOTERM_CC_DIRECT	GO:0009986~cell surface	10	10.989	0.000942574	PLAT, ICAM1, TNF, PDGFB, BST2, TLR2, HBEGF, KRT4, ITGB3, ADAM8	86	542	18224	3.90972	0.0942726	0.0324669	1.05074
GOTERM_CC_DIRECT	GO:0001533~cornified envelope	4	4.3956	0.00128616	SPRR2D, SPRR2A, SPRR2E, IVL	86	46	18224	18.4267	0.126401	0.0332192	1.43125
GOTERM_CC_DIRECT	GO:0070062~extracellular exosome	24	26.3736	0.00407215	PLAT, ICAM1, KRT6B, S100A8, BST2, CFB, C3, MMP9, S100A9, SLC6A14, ITGB3, KRT24, SOD2, PSMB9, PDZK1IP1, SAA2, RHCG, SAA1, PI3, SERPINA3, VNN1, IL1B, TNFAIP3, IVL	86	2811	18224	1.80924	0.348481	0.0821211	4.46775
GOTERM_CC_DIRECT	GO:0045121~membrane raft	5	5.49451	0.0157648	ICAM1, TNF, BST2, TLR2, BIRC3	86	206	18224	5.14337	0.811468	0.242765	16.3051
GOTERM_CC_DIRECT	GO:0005737~cytoplasm	34	37.3626	0.0274988	PDGFB, STAT5A, EDN1, TLR2, OAS3, TNFSF14, IFI44L, OAS1, OAS2, SPRR2E, KRT24, LIF, CYP27B1, SPRR2D, SPRR2A, MAP3K8, C8ORF4, ZC3H12A, MX1, ADAM8, IVL, TNIP1, MX2, IRAK2, PLAT, IL6, BST2, SOCS3, BIRC3, S100A12, PSMB9, IRF9, IRF7, TNFAIP3	86	5222	18224	1.37971	0.946486	0.341808	26.8264
GOTERM_CC_DIRECT	GO:0005829~cytosol	23	25.2747	0.0488638	IRAK2, S100A8, SOCS3, STAT5A, S100A9, OAS3, OAS1, IL32, OAS2, BIRC3, S100A12, PSMB9, IRF9, TYMP, RND1, IRF7, MAP3K8, IL1B, XAF1, TNFAIP3, MX1, MX2, IL1A	86	3315	18224	1.47024	0.994806	0.481874	42.9453
GOTERM_CC_DIRECT	GO:0005887~integral component of plasma membrane	12	13.1868	0.0640832	ICAM1, P2RY6, TNF, RHCG, BST2, C1QTNF1, MRGPRX3, SLC6A14, TLR2, HBEGF, ITGB3, ADAM8	86	1415	18224	1.79709	0.999045	0.538221	52.3765
GOTERM_CC_DIRECT	GO:0005856~cytoskeleton	5	5.49451	0.0953217	RND1, S100A8, S100A9, ZC3H12A, S100A12	86	371	18224	2.85589	0.999973	0.650708	67.4403
GOTERM_CC_DIRECT	GO:0034364~high-density lipoprotein particle	2	2.1978	0.0977931	SAA2, SAA1	86	22	18224	19.2643	0.99998	0.625565	68.4228

## Sheet: KEGG_PATHWAY
Table S3D: KEGG pathway annotation of up-regulated genes.
Category	Term	Count	%	PValue	Genes	List Total	Pop Hits	Pop Total	Fold Enrichment	Bonferroni	Benjamini	FDR
KEGG_PATHWAY	hsa04668:TNF signaling pathway	16	17.5824	6.29696e-17	CXCL1, ICAM1, CSF2, IL6, TNF, SOCS3, CXCL3, MMP9, CXCL2, EDN1, BIRC3, LIF, CCL20, MAP3K8, IL1B, TNFAIP3	46	107	6879	22.3616	1.18794e-14	1.18794e-14	1.22125e-13
KEGG_PATHWAY	hsa04060:Cytokine-cytokine receptor interaction	16	17.5824	1.45137e-11	CXCL1, CSF3, CSF2, IL6, TNF, CXCL5, CXCL3, CXCL2, TNFSF14, CXCL6, LIF, INHBA, CCL20, IL1B, LTB, IL1A	46	243	6879	9.84648	1.55297e-09	7.76484e-10	1.63143e-08
KEGG_PATHWAY	hsa05323:Rheumatoid arthritis	11	12.0879	1.54116e-10	CSF2, ICAM1, IL6, TNF, CXCL5, CCL20, TLR2, IL1B, CXCL6, LTB, IL1A	46	88	6879	18.6929	1.64904e-08	5.49681e-09	1.73236e-07
KEGG_PATHWAY	hsa05162:Measles	12	13.1868	5.40206e-10	IRF9, IL6, STAT5A, IRF7, OAS3, TLR2, IL1B, OAS1, OAS2, MX1, TNFAIP3, IL1A	46	133	6879	13.4926	5.7802e-08	1.44505e-08	6.07224e-07
KEGG_PATHWAY	hsa05164:Influenza A	12	13.1868	9.51621e-09	IRF9, ICAM1, IL6, TNF, SOCS3, IRF7, OAS3, IL1B, OAS1, OAS2, MX1, IL1A	46	174	6879	10.3133	1.01823e-06	2.03647e-07	1.06968e-05
KEGG_PATHWAY	hsa05168:Herpes simplex infection	12	13.1868	1.6156e-08	IRF9, IL6, TNF, SOCS3, C3, IRF7, OAS3, TLR2, IL1B, TNFSF14, OAS1, OAS2	46	183	6879	9.80613	1.72869e-06	2.88114e-07	1.81603e-05
KEGG_PATHWAY	hsa05134:Legionellosis	8	8.79121	4.43652e-08	CXCL1, IL6, TNF, C3, CXCL3, CXCL2, TLR2, IL1B	46	54	6879	22.1546	4.74707e-06	6.78154e-07	4.98692e-05
KEGG_PATHWAY	hsa04064:NF-kappa B signaling pathway	8	8.79121	1.24668e-06	ICAM1, TNF, BCL2A1, IL1B, TNFSF14, BIRC3, TNFAIP3, LTB	46	87	6879	13.7511	0.000133386	1.66743e-05	0.00140134
KEGG_PATHWAY	hsa04621:NOD-like receptor signaling pathway	7	7.69231	1.41108e-06	CXCL1, IL6, TNF, CXCL2, IL1B, BIRC3, TNFAIP3	46	56	6879	18.6929	0.000150974	1.6776e-05	0.00158612
KEGG_PATHWAY	hsa05133:Pertussis	7	7.69231	7.97587e-06	IL6, TNF, CXCL5, C3, IL1B, CXCL6, IL1A	46	75	6879	13.9574	0.000853058	8.53386e-05	0.008965
KEGG_PATHWAY	hsa05132:Salmonella infection	7	7.69231	1.4378e-05	CXCL1, CSF2, IL6, CXCL3, CXCL2, IL1B, IL1A	46	83	6879	12.6121	0.00153727	0.00013985	0.0161605
KEGG_PATHWAY	hsa05144:Malaria	6	6.59341	1.46772e-05	CSF3, ICAM1, IL6, TNF, TLR2, IL1B	46	49	6879	18.3114	0.00156924	0.000130864	0.0164968
KEGG_PATHWAY	hsa04640:Hematopoietic cell lineage	7	7.69231	1.8864e-05	CSF3, CSF2, IL6, TNF, IL1B, ITGB3, IL1A	46	87	6879	12.0322	0.00201643	0.000155254	0.0212022
KEGG_PATHWAY	hsa05152:Tuberculosis	8	8.79121	0.000131716	IRAK2, IL6, TNF, CYP27B1, C3, TLR2, IL1B, IL1A	46	177	6879	6.75903	0.0139956	0.00100624	0.147956
KEGG_PATHWAY	hsa05160:Hepatitis C	7	7.69231	0.000204587	IRF9, TNF, SOCS3, IRF7, OAS3, OAS1, OAS2	46	133	6879	7.87071	0.0216551	0.00145847	0.229727
KEGG_PATHWAY	hsa04630:Jak-STAT signaling pathway	7	7.69231	0.000327096	LIF, CSF3, IRF9, CSF2, IL6, SOCS3, STAT5A	46	145	6879	7.21934	0.0343994	0.00218542	0.367061
KEGG_PATHWAY	hsa04620:Toll-like receptor signaling pathway	6	6.59341	0.000591512	IL6, TNF, IRF7, MAP3K8, TLR2, IL1B	46	106	6879	8.46473	0.061348	0.00371722	0.662885
KEGG_PATHWAY	hsa05321:Inflammatory bowel disease (IBD)	5	5.49451	0.000762758	IL6, TNF, TLR2, IL1B, IL1A	46	64	6879	11.6831	0.0784021	0.00452563	0.854045
KEGG_PATHWAY	hsa05140:Leishmaniasis	5	5.49451	0.00112824	TNF, C3, TLR2, IL1B, IL1A	46	71	6879	10.5312	0.11378	0.00633719	1.26091
KEGG_PATHWAY	hsa05143:African trypanosomiasis	4	4.3956	0.00124442	ICAM1, IL6, TNF, IL1B	46	33	6879	18.1265	0.124741	0.00663965	1.38992
KEGG_PATHWAY	hsa05332:Graft-versus-host disease	4	4.3956	0.00124442	IL6, TNF, IL1B, IL1A	46	33	6879	18.1265	0.124741	0.00663965	1.38992
KEGG_PATHWAY	hsa04380:Osteoclast differentiation	6	6.59341	0.00153885	IRF9, TNF, SOCS3, IL1B, ITGB3, IL1A	46	131	6879	6.84932	0.151923	0.00781612	1.71619
KEGG_PATHWAY	hsa05161:Hepatitis B	6	6.59341	0.00240717	IL6, TNF, STAT5A, IRF7, MMP9, TLR2	46	145	6879	6.18801	0.22731	0.0116533	2.6727
KEGG_PATHWAY	hsa05142:Chagas disease (American trypanosomiasis)	5	5.49451	0.00456523	IL6, TNF, C3, TLR2, IL1B	46	104	6879	7.18959	0.387127	0.0210619	5.01331
KEGG_PATHWAY	hsa05146:Amoebiasis	5	5.49451	0.00488564	CSF2, IL6, TNF, TLR2, IL1B	46	106	6879	7.05394	0.407879	0.0215985	5.35642
KEGG_PATHWAY	hsa04062:Chemokine signaling pathway	6	6.59341	0.00696373	CXCL1, CXCL5, CCL20, CXCL3, CXCL2, CXCL6	46	186	6879	4.82398	0.526558	0.0294662	7.55445
KEGG_PATHWAY	hsa04932:Non-alcoholic fatty liver disease (NAFLD)	5	5.49451	0.0165483	IL6, TNF, SOCS3, IL1B, IL1A	46	151	6879	4.95177	0.832283	0.0663673	17.1028
KEGG_PATHWAY	hsa05020:Prion diseases	3	3.2967	0.0205574	IL6, IL1B, IL1A	46	34	6879	13.195	0.891669	0.0790203	20.8231
KEGG_PATHWAY	hsa05202:Transcriptional misregulation in cancer	5	5.49451	0.023051	PLAT, CSF2, IL6, MMP9, BCL2A1	46	167	6879	4.47735	0.91753	0.085263	23.0596
KEGG_PATHWAY	hsa05166:HTLV-I infection	6	6.59341	0.0241774	CSF2, ICAM1, IL6, TNF, PDGFB, STAT5A	46	254	6879	3.53252	0.927108	0.0863451	24.051
KEGG_PATHWAY	hsa05219:Bladder cancer	3	3.2967	0.0291951	TYMP, MMP9, HBEGF	46	41	6879	10.9422	0.958013	0.100287	28.327
KEGG_PATHWAY	hsa04940:Type I diabetes mellitus	3	3.2967	0.0305292	TNF, IL1B, IL1A	46	42	6879	10.6817	0.963758	0.10149	29.4264
KEGG_PATHWAY	hsa05205:Proteoglycans in cancer	5	5.49451	0.0408634	TNF, MMP9, TLR2, HBEGF, ITGB3	46	200	6879	3.73859	0.988486	0.130213	37.4359
KEGG_PATHWAY	hsa05150:Staphylococcus aureus infection	3	3.2967	0.0483068	ICAM1, C3, CFB	46	54	6879	8.30797	0.994998	0.148317	42.6818
KEGG_PATHWAY	hsa04623:Cytosolic DNA-sensing pathway	3	3.2967	0.0653376	IL6, IRF7, IL1B	46	64	6879	7.00985	0.999275	0.191558	53.2112
KEGG_PATHWAY	hsa04610:Complement and coagulation cascades	3	3.2967	0.0745047	PLAT, C3, CFB	46	69	6879	6.50189	0.999748	0.210774	58.1181
KEGG_PATHWAY	hsa04010:MAPK signaling pathway	5	5.49451	0.0822621	TNF, PDGFB, MAP3K8, IL1B, IL1A	46	253	6879	2.9554	0.999897	0.225197	61.8991
KEGG_PATHWAY	hsa05410:Hypertrophic cardiomyopathy (HCM)	3	3.2967	0.0919586	IL6, TNF, ITGB3	46	78	6879	5.75167	0.999967	0.243435	66.1871

## Sheet: BIOCARTA
Table S3E: BIOCARTA pathway annotation of up-regulated genes.
Category	Term	Count	%	PValue	Genes	List Total	Pop Hits	Pop Total	Fold Enrichment	Bonferroni	Benjamini	FDR
BIOCARTA	h_LairPathway:Cells and Molecules involved in local acute inflammatory response	5	5.49451	0.000144188	ICAM1, IL6, TNF, C3, IL1A	29	17	1625	16.4807	0.0116121	0.0116121	0.153559
BIOCARTA	h_il10Pathway:IL-10 Anti-inflammatory Signaling Pathway	4	4.3956	0.00116863	IL6, TNF, STAT5A, IL1A	29	13	1625	17.2414	0.0903669	0.0462531	1.23844
BIOCARTA	h_inflamPathway:Cytokines and Inflammatory Response	5	5.49451	0.00124722	CSF3, CSF2, IL6, TNF, IL1A	29	29	1625	9.66112	0.0961467	0.0331347	1.32123
BIOCARTA	h_granulocytesPathway:Adhesion and Diapedesis of Granulocytes	4	4.3956	0.00181658	CSF3, ICAM1, TNF, IL1A	29	15	1625	14.9425	0.136945	0.0361496	1.91909
BIOCARTA	h_erythPathway:Erythrocyte Differentiation Pathway	4	4.3956	0.00181658	CSF3, CSF2, IL6, IL1A	29	15	1625	14.9425	0.136945	0.0361496	1.91909
BIOCARTA	h_il1rPathway:Signal transduction through IL1R	5	5.49451	0.00204884	IRAK2, IL6, TNF, IL1B, IL1A	29	33	1625	8.49007	0.15306	0.0326793	2.16204
BIOCARTA	h_stemPathway:Regulation of hematopoiesis by cytokines	3	3.2967	0.0261808	CSF3, CSF2, IL6	29	15	1625	11.2069	0.883388	0.301032	24.6281
BIOCARTA	h_cytokinePathway:Cytokine Network	3	3.2967	0.0534876	IL6, TNF, IL1A	29	22	1625	7.64107	0.988353	0.470645	44.3365
BIOCARTA	h_nfkbPathway:NF-kB Signaling Pathway	3	3.2967	0.0579678	TNF, TNFAIP3, IL1A	29	23	1625	7.30885	0.992069	0.453719	47.0812
BIOCARTA	h_nthiPathway:NFkB activation by Nontypeable Hemophilus influenzae	3	3.2967	0.0625756	TNF, TLR2, IL1B	29	24	1625	7.00431	0.994669	0.440981	49.7755

## Sheet: GAD_DISEASE
Table S3F: Disease annotation of up-regulated genes.
Category	Term	Count	%	PValue	Genes	List Total	Pop Hits	Pop Total	Fold Enrichment	Bonferroni	Benjamini	FDR
GAD_DISEASE	ovarian cancer	24	26.3736	3.08391e-18	CXCL1, PLAT, IL6, TNF, IFITM1, BST2, PDGFB, C3, MMP9, CXCL3, OAS3, OAS1, CXCL6, ITGB3, SOD2, INHBA, IRF7, IL1B, TNFAIP3, ADAM8, MX1, TNFAIP2, IFI6, IL1A	75	370	12971	11.2182	6.23258e-15	6.23258e-15	5.3087e-15
GAD_DISEASE	Asthma|Bronchiolitis, Viral|Respiratory Syncytial Virus Infections	18	19.7802	1.12214e-15	CXCL1, CSF3, ICAM1, CSF2, IL6, TNF, CXCL5, C3, SOCS3, CXCL3, STAT5A, CXCL2, EDN1, TLR2, CXCL6, IRF9, IL1B, IL1A	75	204	12971	15.26	2.24376e-12	1.12188e-12	1.90958e-12
GAD_DISEASE	respiratory syncytial virus bronchiolitis	18	19.7802	1.12214e-15	CXCL1, CSF3, ICAM1, CSF2, IL6, TNF, CXCL5, C3, SOCS3, CXCL3, STAT5A, CXCL2, EDN1, TLR2, CXCL6, IRF9, IL1B, IL1A	75	204	12971	15.26	2.24376e-12	1.12188e-12	1.90958e-12
GAD_DISEASE	Bronchiolitis, Viral|Respiratory Syncytial Virus Infections	18	19.7802	2.08652e-15	CXCL1, CSF3, ICAM1, CSF2, IL6, TNF, CXCL5, C3, SOCS3, CXCL3, STAT5A, CXCL2, EDN1, TLR2, CXCL6, IRF9, IL1B, IL1A	75	211	12971	14.7537	4.26315e-12	1.42109e-12	3.63043e-12
GAD_DISEASE	atherosclerosis	19	20.8791	8.70466e-13	PLAT, CSF3, ICAM1, CSF2, IL6, TNF, PDGFB, C3, MMP9, EDN1, TLR2, ITGB3, MMP13, SOD2, IL1B, TNFAIP3, ADAM8, LTB, IL1A	75	355	12971	9.2563	1.75911e-09	4.39777e-10	1.49835e-09
GAD_DISEASE	subarachnoid hemorrhage	7	7.69231	4.93114e-10	IL6, TNF, MMP9, SERPINA3, IL1B, ITGB3, IL1A	75	18	12971	67.257	9.96583e-07	1.99317e-07	8.48855e-07
GAD_DISEASE	Chorioamnionitis|Fetal Membranes, Premature Rupture|Infection of amniotic sac and membranes	13	14.2857	5.35633e-10	PLAT, CSF3, CSF2, IL6, TNF, PDGFB, MMP9, EDN1, TLR2, IL1B, ITGB3, MMP13, IL1A	75	186	12971	12.0877	1.08251e-06	1.80419e-07	9.22048e-07
GAD_DISEASE	Chorioamnionitis|Fetal Membranes, Premature Rupture|Infection of amniotic sac and membranes|Obstetric Labor, Premature|Pre-Eclampsia|Premature Birth	13	14.2857	5.69815e-10	PLAT, CSF3, CSF2, IL6, TNF, PDGFB, MMP9, EDN1, TLR2, IL1B, ITGB3, MMP13, IL1A	75	187	12971	12.023	1.1516e-06	1.64514e-07	9.8089e-07
GAD_DISEASE	diabetes, type 1	13	14.2857	6.84526e-10	ICAM1, IL6, TNF, SOCS3, OAS3, TLR2, OAS1, OAS2, SOD2, PSMB9, CYP27B1, IL1B, IL1A	75	190	12971	11.8332	1.38343e-06	1.72928e-07	1.17836e-06
GAD_DISEASE	Type 2 Diabetes| edema | rosiglitazone	36	39.5604	1.30488e-09	CSF3, CSF2, TNF, PDGFB, C3, MMP9, EDN1, TLR2, ITGB3, LIF, TYMP, CYP27B1, SAA2, CCL20, SAA1, SERPINA3, IL1B, LTB, MX2, IL1A, IRAK2, PLAT, ICAM1, IL6, CFB, BCL2A1, SLC6A14, BIRC3, MMP13, SOD2, PSMB9, PDZK1IP1, RHCG, HBEGF, TNFAIP3, TNFAIP2	75	2198	12971	2.83261	2.63715e-06	2.93017e-07	2.24624e-06
GAD_DISEASE	Erythema Nodosum|Sarcoidosis	7	7.69231	1.94655e-09	CSF2, ICAM1, IL6, TNF, CXCL5, C3, IL1A	75	22	12971	55.0285	3.93397e-06	3.93398e-07	3.35083e-06
GAD_DISEASE	lung cancer	18	19.7802	3.37346e-09	CSF3, ICAM1, CSF2, IL6, TNF, MMP9, EDN1, TLR2, ITGB3, BIRC3, MMP13, SOD2, CYP27B1, SERPINA3, IL1B, MX1, TNIP1, IL1A	75	516	12971	6.03302	6.81774e-06	6.19797e-07	5.80714e-06
GAD_DISEASE	Dengue Hemorrhagic Fever	10	10.989	5.81683e-09	ICAM1, IL6, TNF, SOCS3, IRF7, OAS3, OAS1, OAS2, ITGB3, MX1	75	102	12971	16.9556	1.17558e-05	9.79651e-07	1.00132e-05
GAD_DISEASE	periodontitis	10	10.989	5.81683e-09	PLAT, ICAM1, IL6, TNF, S100A8, MMP9, EDN1, TLR2, IL1B, IL1A	75	102	12971	16.9556	1.17558e-05	9.79651e-07	1.00132e-05
GAD_DISEASE	systemic lupus erythematosus	11	12.0879	7.60827e-09	IL6, FAM167A, TNF, C3, CFB, TLR2, IL1B, TNFAIP3, TNIP1, IL1A, SOD2	75	143	12971	13.3036	1.53762e-05	1.18279e-06	1.3097e-05
GAD_DISEASE	rheumatoid arthritis	12	13.1868	9.33486e-09	PLAT, IL6, FAM167A, TNF, SAA1, MMP9, TLR2, IL1B, TNFAIP3, MMP13, LTB, PSMB9	75	190	12971	10.9229	1.88656e-05	1.34755e-06	1.60692e-05
GAD_DISEASE	atherosclerosis, coronary	11	12.0879	1.65481e-08	PLAT, ICAM1, TNF, MMP9, EDN1, TLR2, IL1B, ITGB3, TNFAIP3, IL1A, SOD2	75	155	12971	12.2736	3.34432e-05	2.22958e-06	2.84862e-05
GAD_DISEASE	Inflammation|Venous Thromboembolism	7	7.69231	2.74985e-08	CSF2, ICAM1, IL6, TNF, C3, IL1B, IL1A	75	33	12971	36.6857	5.55729e-05	3.4734e-06	4.73364e-05
GAD_DISEASE	Chlamydia Infections|Inflammation|Trachoma	7	7.69231	2.74985e-08	CSF2, ICAM1, IL6, TNF, C3, IL1B, IL1A	75	33	12971	36.6857	5.55729e-05	3.4734e-06	4.73364e-05
GAD_DISEASE	Brain Ischemia|Inflammation|Stroke	7	7.69231	2.74985e-08	CSF2, ICAM1, IL6, TNF, C3, IL1B, IL1A	75	33	12971	36.6857	5.55729e-05	3.4734e-06	4.73364e-05
GAD_DISEASE	Recurrence|Venous Thromboembolism	8	8.79121	3.50922e-08	CSF2, ICAM1, IL6, TNF, C3, IL1B, ITGB3, IL1A	75	58	12971	23.8547	7.09188e-05	4.17183e-06	6.04083e-05
GAD_DISEASE	hepatitis B	8	8.79121	5.02305e-08	IL6, TNF, MMP9, OAS3, OAS1, OAS2, MX1, PSMB9	75	61	12971	22.6815	0.000101511	5.63975e-06	8.64676e-05
GAD_DISEASE	Brain Ischemia|Hypertension|Osteoporosis|Stroke	8	8.79121	7.05587e-08	CSF2, ICAM1, IL6, TNF, C3, IL1B, ITGB3, IL1A	75	64	12971	21.6183	0.000142589	7.50519e-06	0.000121461
GAD_DISEASE	chronic obstructive pulmonary disease	15	16.4835	7.27172e-08	CSF3, CSF2, ICAM1, TNF, MMP9, EDN1, TLR2, BIRC3, SOD2, CYP27B1, SERPINA3, IL1B, MX1, TNIP1, IL1A	75	414	12971	6.26618	0.000146951	7.34805e-06	0.000125177
GAD_DISEASE	restenosis	8	8.79121	8.76581e-08	ICAM1, IL6, TNF, MMP9, EDN1, IL1B, ITGB3, IL1A	75	66	12971	20.9632	0.000177141	8.43602e-06	0.000150896
GAD_DISEASE	Coronary Artery Disease|Inflammation	7	7.69231	9.23423e-08	CSF2, ICAM1, IL6, TNF, C3, IL1B, IL1A	75	40	12971	30.2657	0.000186606	8.48286e-06	0.00015896
GAD_DISEASE	Hepatitis C, Chronic|Liver Cirrhosis	8	8.79121	1.08133e-07	TNF, IRF7, MMP9, IL1B, OAS1, MX1, MMP13, IL1A	75	68	12971	20.3467	0.000218513	9.50158e-06	0.000186142
GAD_DISEASE	multiple system atrophy	6	6.59341	1.63666e-07	ICAM1, IL6, TNF, SERPINA3, IL1B, IL1A	75	23	12971	45.1165	0.000330713	1.37819e-05	0.000281736
GAD_DISEASE	Pancreatitis, Chronic	6	6.59341	2.56135e-07	ICAM1, IL6, TNF, SERPINA3, IL1B, SOD2	75	25	12971	41.5072	0.000517515	2.07057e-05	0.000440914
GAD_DISEASE	Glomerulonephritis, IGA	9	9.89011	2.7661e-07	ICAM1, IL6, TNF, MMP9, EDN1, TLR2, IL1B, IL1A, SOD2	75	115	12971	13.535	0.000558872	2.15008e-05	0.000476159
GAD_DISEASE	Asthma|	9	9.89011	3.37469e-07	IL6, TNF, CYP27B1, C3, EDN1, TLR2, IL1B, ITGB3, IL1A	75	118	12971	13.1908	0.000681793	2.52599e-05	0.000580924
GAD_DISEASE	Pre-Eclampsia	8	8.79121	3.6567e-07	IL6, TNF, MMP9, EDN1, TLR2, IL1B, IL1A, SOD2	75	81	12971	17.0812	0.000738747	2.63932e-05	0.00062947
GAD_DISEASE	hepatitis C	8	8.79121	4.32685e-07	IFI27, IL6, TNF, STAT5A, IL1B, OAS1, ITGB3, MX1	75	83	12971	16.6696	0.000874075	3.01532e-05	0.000744829
GAD_DISEASE	pneumoconiosis	5	5.49451	4.66688e-07	PLAT, IL6, TNF, IL1B, IL1A	75	12	12971	72.0611	0.000942732	3.14387e-05	0.000803362
GAD_DISEASE	Pulmonary Disease, Chronic Obstructive	8	8.79121	5.9802e-07	CSF3, CSF2, IL6, TNF, MMP9, TLR2, IL1B, SOD2	75	87	12971	15.9031	0.00120787	3.89863e-05	0.00102944
GAD_DISEASE	patent ductus arteriosus	9	9.89011	7.09537e-07	IL6, TNF, MMP9, EDN1, IL1B, ITGB3, BIRC3, TNFAIP3, IL1A	75	130	12971	11.9732	0.00143295	4.48107e-05	0.0012214
GAD_DISEASE	Chronic Periodontitis|Periodontitis	4	4.3956	7.10134e-07	IL6, TNF, IL1B, IL1A	75	4	12971	172.947	0.00143415	4.34894e-05	0.00122243
GAD_DISEASE	Dementia|Inflammation	4	4.3956	7.10134e-07	IL6, TNF, IL1B, IL1A	75	4	12971	172.947	0.00143415	4.34894e-05	0.00122243
GAD_DISEASE	Migraine Disorders	8	8.79121	7.54314e-07	CSF2, ICAM1, IL6, TNF, C3, IL1B, ITGB3, IL1A	75	90	12971	15.373	0.00152331	4.48363e-05	0.00129848
GAD_DISEASE	Multiple Sclerosis	16	17.5824	7.68162e-07	ICAM1, IL6, TNF, CFB, MMP9, TLR2, TNFSF14, OAS1, PSMB9, LIF, IRF9, CYP27B1, IL1B, MX1, TNFAIP3, IL1A	75	581	12971	4.76273	0.00155125	4.43549e-05	0.00132232
GAD_DISEASE	Asthma|Bronchial Hyperreactivity|Hypersensitivity, Immediate	8	8.79121	8.1348e-07	CSF2, TNF, C3, EDN1, SERPINA3, TLR2, IL1B, IL1A	75	91	12971	15.2041	0.00164269	4.56668e-05	0.00140033
GAD_DISEASE	Otitis Media|Recurrence	5	5.49451	9.35622e-07	IL6, TNF, TLR2, IL1B, IL1A	75	14	12971	61.7667	0.00188911	5.11039e-05	0.00161058
GAD_DISEASE	Coronary Disease	11	12.0879	9.55475e-07	ICAM1, IL6, TNF, C3, CFB, MMP9, TLR2, IL1B, ITGB3, IL1A, SOD2	75	239	12971	7.95989	0.00192915	5.08149e-05	0.00164476
GAD_DISEASE	Cardiovascular Diseases	10	10.989	1.19609e-06	ICAM1, IL6, TNF, SAA2, SAA1, MMP9, TLR2, IL1B, ITGB3, IL1A	75	189	12971	9.15062	0.00241438	6.19801e-05	0.00205895
GAD_DISEASE	periodontal disease	5	5.49451	1.27034e-06	IL6, TNF, TLR2, IL1B, IL1A	75	15	12971	57.6489	0.00256407	6.41821e-05	0.00218677
GAD_DISEASE	Bladder Cancer	15	16.4835	1.41843e-06	CSF3, CSF2, ICAM1, IL6, TNF, MMP9, EDN1, TLR2, BIRC3, SOD2, IFI27, IL1B, MX1, TNIP1, IL1A	75	529	12971	4.90397	0.00286255	6.99159e-05	0.00244169
GAD_DISEASE	Asthma	14	15.3846	1.72086e-06	CSF2, ICAM1, IL6, TNF, C3, MMP9, EDN1, TLR2, SOD2, SERPINA3, IL1B, LTB, TNIP1, IL1A	75	460	12971	5.26359	0.00347181	8.28025e-05	0.00296227
GAD_DISEASE	Osteolysis	4	4.3956	1.76805e-06	IL6, TNF, IL1B, IL1A	75	5	12971	138.357	0.00356685	8.30948e-05	0.0030435
GAD_DISEASE	Cardiovascular Diseases|	7	7.69231	2.12619e-06	PLAT, ICAM1, IL6, TNF, IL1B, ITGB3, IL1A	75	67	12971	18.0691	0.00428782	9.76552e-05	0.00366
GAD_DISEASE	Duodenal Ulcer|Helicobacter Infections	5	5.49451	2.19589e-06	IL6, TNF, MMP9, TLR2, IL1B	75	17	12971	50.8667	0.00442808	9.86153e-05	0.00377998
GAD_DISEASE	preterm delivery	6	6.59341	2.28418e-06	IL6, TNF, MMP9, TLR2, IL1B, IL1A	75	38	12971	27.3074	0.0046057	0.00010035	0.00393196
GAD_DISEASE	sepsis	6	6.59341	2.28418e-06	IL6, TNF, CXCL2, IL1B, IL1A, SOD2	75	38	12971	27.3074	0.0046057	0.00010035	0.00393196
GAD_DISEASE	Sarcoidosis	7	7.69231	2.53117e-06	IL6, TNF, CYP27B1, EDN1, TLR2, IL1B, IL1A	75	69	12971	17.5453	0.00510245	0.000108835	0.00435712
GAD_DISEASE	Hepatitis B, Chronic	7	7.69231	2.99695e-06	IL6, TNF, OAS3, IL1B, OAS1, OAS2, MX1	75	71	12971	17.0511	0.00603853	0.000126176	0.00515887
GAD_DISEASE	Hepatitis C|Remission, Spontaneous	8	8.79121	3.31069e-06	IRF9, ICAM1, TNF, IFITM1, STAT5A, IRF7, MX1, MX2	75	112	12971	12.3533	0.00666859	0.00013654	0.00569893
GAD_DISEASE	Atrial Fibrillation|Inflammation	4	4.3956	3.52158e-06	IL6, TNF, IL1B, IL1A	75	6	12971	115.298	0.00709185	0.000142332	0.00606193
GAD_DISEASE	Apoplexy|Atherosclerosis|Inflammation|Stroke	4	4.3956	3.52158e-06	IL6, TNF, IL1B, IL1A	75	6	12971	115.298	0.00709185	0.000142332	0.00606193
GAD_DISEASE	Q fever	5	5.49451	3.5454e-06	ICAM1, IL6, TNF, TLR2, IL1B	75	19	12971	45.5123	0.00713965	0.000140485	0.00610294
GAD_DISEASE	Lung Cancer	15	16.4835	5.37874e-06	CSF3, CSF2, ICAM1, IL6, TNF, MMP9, EDN1, TLR2, BIRC3, SOD2, CYP27B1, IL1B, MX1, TNIP1, IL1A	75	593	12971	4.3747	0.0108116	0.000209026	0.00925866
GAD_DISEASE	ankylosing spondylitis	6	6.59341	5.38992e-06	IL6, TNF, IL1B, IL1A, PSMB9, SOD2	75	45	12971	23.0596	0.0108339	0.000205508	0.0092779
GAD_DISEASE	Biliary Tract Neoplasms|Inflammation	5	5.49451	5.42742e-06	IL6, TNF, IL1B, IL1A, SOD2	75	21	12971	41.1778	0.0109089	0.000203106	0.00934244
GAD_DISEASE	Hemorrhagic Fever with Renal Syndrome	4	4.3956	6.13747e-06	TNF, IL1B, ITGB3, IL1A	75	7	12971	98.8267	0.0123273	0.000225499	0.0105646
GAD_DISEASE	Bleeding After Cardiac Surgery	4	4.3956	6.13747e-06	ICAM1, IL6, TNF, IL1B	75	7	12971	98.8267	0.0123273	0.000225499	0.0105646
GAD_DISEASE	diabetes, type 2	13	14.2857	6.35719e-06	CSF2, ICAM1, IL6, TNF, CFB, SOCS3, MMP9, EDN1, ITGB3, SOD2, CYP27B1, IL1B, IL1A	75	439	12971	5.12143	0.0127657	0.000229401	0.0109428
GAD_DISEASE	Arthritis, Rheumatoid|Rheumatoid Arthritis	9	9.89011	6.88808e-06	ICAM1, IL36G, IL6, TNF, SOCS3, TLR2, IL1B, TNFAIP3, IL1A	75	176	12971	8.84386	0.0138244	0.000244196	0.0118566
GAD_DISEASE	Acute Coronary Syndrome	6	6.59341	7.45422e-06	IL6, CXCL5, MMP9, IL1B, ITGB3, PSMB9	75	48	12971	21.6183	0.0149521	0.000259708	0.0128311
GAD_DISEASE	Puerperal Disorders|Sepsis|Streptococcal Infections|Systemic infection	5	5.49451	7.96097e-06	IL6, TNF, TLR2, IL1B, IL1A	75	23	12971	37.5971	0.0159604	0.000272661	0.0137033
GAD_DISEASE	cervical intraepithelial neoplasia grade 3	6	6.59341	8.26458e-06	IL6, TNF, TLR2, IL1B, IL1A, SOD2	75	49	12971	21.1771	0.0165641	0.000278341	0.0142258
GAD_DISEASE	Multiple Organ Failure|Multiple Trauma|Sepsis|Systemic infection	4	4.3956	9.77967e-06	IL6, TNF, IL1B, IL1A	75	8	12971	86.4733	0.0195708	0.000323961	0.0168336
GAD_DISEASE	cirrhosis; pancreatitis	4	4.3956	1.46093e-05	IL6, TNF, IL1B, IL1A	75	9	12971	76.8652	0.029094	0.000476107	0.0251458
GAD_DISEASE	Stomatitis, Aphthous	4	4.3956	1.46093e-05	IL6, TNF, IL1B, IL1A	75	9	12971	76.8652	0.029094	0.000476107	0.0251458
GAD_DISEASE	Liver Diseases, Alcoholic	4	4.3956	1.46093e-05	IL6, TNF, IL1B, IL1A	75	9	12971	76.8652	0.029094	0.000476107	0.0251458
GAD_DISEASE	null	18	19.7802	1.53194e-05	PLAT, ICAM1, CSF2, IL6, TNF, C3, MMP9, EDN1, TLR2, TNFSF14, ITGB3, MMP13, SOD2, CYP27B1, SERPINA3, IL1B, TNFAIP3, IL1A	75	936	12971	3.3259	0.0304864	0.000491319	0.0263678
GAD_DISEASE	Pulmonary Fibrosis	5	5.49451	1.5508e-05	IL6, TNF, IL1B, IL1A, SOD2	75	27	12971	32.0272	0.0308557	0.000489596	0.0266923
GAD_DISEASE	Lupus Erythematosus, Systemic	11	12.0879	1.55219e-05	FAM167A, TNF, C3, CFB, IRF7, MMP9, IL1B, TNFAIP3, TNIP1, LTB, PSMB9	75	327	12971	5.81778	0.0308831	0.0004825	0.0267164
GAD_DISEASE	Lymphoma, Large B-Cell, Diffuse	6	6.59341	1.60498e-05	CSF3, ICAM1, IL6, TNF, IL1B, IL1A	75	56	12971	18.53	0.0319164	0.000491346	0.0276247
GAD_DISEASE	benzene haematotoxicity	10	10.989	1.7138e-05	ICAM1, IL6, TNF, C3, BCL2A1, TLR2, IL1B, TNFSF14, TNIP1, IL1A	75	262	12971	6.60102	0.0340433	0.000516826	0.0294976
GAD_DISEASE	Brain Ischemia|Stroke	7	7.69231	1.73371e-05	ICAM1, IL6, TNF, IL1B, ITGB3, LTB, IL1A	75	96	12971	12.6107	0.0344318	0.00051514	0.0298402
GAD_DISEASE	Tuberculosis, Pulmonary	6	6.59341	1.75152e-05	IL6, TNF, CYP27B1, MMP9, TLR2, IL1B	75	57	12971	18.2049	0.0347794	0.000512892	0.0301468
GAD_DISEASE	stroke, ischemic	6	6.59341	1.75152e-05	PLAT, ICAM1, IL6, TNF, IL1B, ITGB3	75	57	12971	18.2049	0.0347794	0.000512892	0.0301468
GAD_DISEASE	Sepsis|Systemic infection	5	5.49451	1.80147e-05	IL6, TNF, CXCL2, TLR2, IL1B	75	28	12971	30.8833	0.0357532	0.000519979	0.0310063
GAD_DISEASE	Alzheimer's Disease	11	12.0879	1.81627e-05	PLAT, CXCL1, ICAM1, IL6, TNF, MMP9, SERPINA3, IL1B, IL1A, PSMB9, SOD2	75	333	12971	5.71295	0.0360416	0.000516868	0.031261
GAD_DISEASE	Alzheimer's disease	18	19.7802	1.85818e-05	PLAT, ICAM1, CSF2, IL6, TNF, CFB, C3, MMP9, EDN1, SAA2, SAA1, MAP3K8, SERPINA3, IL1B, ADAM8, TNFAIP3, TNFAIP2, IL1A	75	950	12971	3.27688	0.0368577	0.000521449	0.0319822
GAD_DISEASE	Arthritis	6	6.59341	2.07577e-05	ICAM1, IL6, TNF, IL1B, IL1A, SOD2	75	59	12971	17.5878	0.0410839	0.000574516	0.0357267
GAD_DISEASE	Cystic Fibrosis	6	6.59341	2.07577e-05	IL6, TNF, EDN1, IL1B, CXCL6, IL1A	75	59	12971	17.5878	0.0410839	0.000574516	0.0357267
GAD_DISEASE	Uveitis, Anterior	4	4.3956	2.07849e-05	ICAM1, IL6, TNF, SOD2	75	10	12971	69.1787	0.0411366	0.000567497	0.0357734
GAD_DISEASE	Communicable Diseases|Severe Acute Respiratory Syndrome	4	4.3956	2.07849e-05	IL6, TNF, IL1B, IL1A	75	10	12971	69.1787	0.0411366	0.000567497	0.0357734
GAD_DISEASE	disc disease, intervertebral	4	4.3956	2.07849e-05	IL6, TNF, IL1B, IL1A	75	10	12971	69.1787	0.0411366	0.000567497	0.0357734
GAD_DISEASE	COPD | Chronic obstructive Pulmonary Disease	5	5.49451	2.0807e-05	IL6, TNF, MMP9, SERPINA3, IL1B	75	29	12971	29.8184	0.0411796	0.000560529	0.0358116
GAD_DISEASE	juvenile arthritis	5	5.49451	2.0807e-05	IL6, TNF, IL1B, IL1A, PSMB9	75	29	12971	29.8184	0.0411796	0.000560529	0.0358116
GAD_DISEASE	Endometriosis	7	7.69231	2.1896e-05	ICAM1, IL6, TNF, MMP9, IL1B, MMP13, IL1A	75	100	12971	12.1063	0.0432874	0.000582097	0.0376854
GAD_DISEASE	Birth Weight|Leukemia|Leukemia, Myeloid, Acute|Precursor Cell Lymphoblastic Leukemia-Lymphoma	9	9.89011	2.2451e-05	IRAK2, ICAM1, CCL20, SOCS3, C3, CFB, STAT5A, TLR2, SOD2	75	207	12971	7.51942	0.04436	0.0005891	0.0386406
GAD_DISEASE	HIV	9	9.89011	2.32433e-05	IRAK2, ICAM1, IL6, TNF, CXCL3, CXCL2, TLR2, IL1B, IL1A	75	208	12971	7.48327	0.0458889	0.000602065	0.0400038
GAD_DISEASE	Meningeal Neoplasms|meningioma	9	9.89011	2.48983e-05	IRAK2, ICAM1, CCL20, SOCS3, C3, CFB, STAT5A, TLR2, SOD2	75	210	12971	7.412	0.049075	0.000636761	0.0428518
GAD_DISEASE	Colorectal Cancer	12	13.1868	2.73043e-05	ICAM1, INHBA, IL6, TNF, CXCL5, MMP9, TLR2, IL1B, ITGB3, IL1A, PSMB9, SOD2	75	426	12971	4.87174	0.0536877	0.000689546	0.0469916
GAD_DISEASE	Osteolysis|Prosthesis Failure	4	4.3956	2.8462e-05	IL6, TNF, IL1B, IL1A	75	11	12971	62.8897	0.0558994	0.000709903	0.0489837
GAD_DISEASE	Graves Ophthalmopathy	4	4.3956	2.8462e-05	IL6, TNF, IL1B, IL1A	75	11	12971	62.8897	0.0558994	0.000709903	0.0489837
GAD_DISEASE	renal transplantation, rejection after	4	4.3956	2.8462e-05	IL6, TNF, IL1B, IL1A	75	11	12971	62.8897	0.0558994	0.000709903	0.0489837
GAD_DISEASE	Spondylitis, Ankylosing	6	6.59341	2.86316e-05	IL36G, TNF, TLR2, IL1B, IL1A, PSMB9	75	63	12971	16.4711	0.056223	0.000705426	0.0492756
GAD_DISEASE	Lupus Erythematosus, Systemic|Systemic lupus erythematosus	8	8.79121	3.03635e-05	IL6, FAM167A, TNF, C3, CFB, STAT5A, IRF7, TNFAIP3	75	157	12971	8.81257	0.0595207	0.000739071	0.0522554
GAD_DISEASE	Aggressive Periodontitis|Periodontitis, Juvenile	4	4.3956	3.77938e-05	IL6, TNF, IL1B, IL1A	75	12	12971	57.6489	0.0735384	0.000908905	0.065039
GAD_DISEASE	Spinal Diseases	4	4.3956	3.77938e-05	IL6, MMP9, IL1B, IL1A	75	12	12971	57.6489	0.0735384	0.000908905	0.065039
GAD_DISEASE	graft-versus-host disease; longevity; spondyloarthropathies; aphthous stomatitis	4	4.3956	3.77938e-05	IL6, TNF, IL1B, IL1A	75	12	12971	57.6489	0.0735384	0.000908905	0.065039
GAD_DISEASE	arthritis; asthma; diabetes, type 1; pemphigus; IL-1RI	4	4.3956	3.77938e-05	IL6, TNF, IL1B, IL1A	75	12	12971	57.6489	0.0735384	0.000908905	0.065039
GAD_DISEASE	Cerebral Palsy	5	5.49451	3.97607e-05	PLAT, IL6, TNF, IL1B, ITGB3	75	34	12971	25.4333	0.0772141	0.000944941	0.0684227
GAD_DISEASE	heart disease	5	5.49451	3.97607e-05	IL6, TLR2, IL1B, ITGB3, IL1A	75	34	12971	25.4333	0.0772141	0.000944941	0.0684227
GAD_DISEASE	nephropathy, IgA	5	5.49451	3.97607e-05	IL6, TNF, PDGFB, EDN1, IL1B	75	34	12971	25.4333	0.0772141	0.000944941	0.0684227
GAD_DISEASE	Graves Disease|Graves' Disease	5	5.49451	3.97607e-05	ICAM1, IL6, TNF, IL1B, IL1A	75	34	12971	25.4333	0.0772141	0.000944941	0.0684227
GAD_DISEASE	Arthritis, Rheumatoid	8	8.79121	4.33869e-05	CSF2, ICAM1, IL6, FAM167A, TNF, IL1B, TNFAIP3, SOD2	75	166	12971	8.33478	0.0839522	0.00101909	0.0746607
GAD_DISEASE	bullous pemphigoid	4	4.3956	4.89306e-05	IL6, TNF, IL1B, IL1A	75	13	12971	53.2144	0.0941587	0.00113603	0.0841966
GAD_DISEASE	desensitization in solid organ transplant recipients	4	4.3956	4.89306e-05	IL6, TNF, IL1B, IL1A	75	13	12971	53.2144	0.0941587	0.00113603	0.0841966
GAD_DISEASE	arthritis; osteoarthritis	4	4.3956	4.89306e-05	IL6, TNF, IL1B, IL1A	75	13	12971	53.2144	0.0941587	0.00113603	0.0841966
GAD_DISEASE	Infection|Postoperative Complications	4	4.3956	4.89306e-05	IL6, TNF, IL1B, IL1A	75	13	12971	53.2144	0.0941587	0.00113603	0.0841966
GAD_DISEASE	dermatitis and eczema	5	5.49451	5.58963e-05	CSF2, TNF, BCL2A1, IL1B, SOD2	75	37	12971	23.3712	0.106822	0.00128292	0.0961772
GAD_DISEASE	Scleroderma, Systemic|Skin Ulcer|Systemic Scleroderma	4	4.3956	6.20201e-05	IL6, TNF, IL1B, IL1A	75	14	12971	49.4133	0.117809	0.0014074	0.106709
GAD_DISEASE	Inflammation|Myocardial Infarction	4	4.3956	6.20201e-05	IL6, TNF, IL1B, IL1A	75	14	12971	49.4133	0.117809	0.0014074	0.106709
GAD_DISEASE	sclerosis, systemic	5	5.49451	6.22036e-05	IL6, TNF, EDN1, IL1B, IL1A	75	38	12971	22.7561	0.118136	0.00139588	0.107024
GAD_DISEASE	Pancreatitis	5	5.49451	6.22036e-05	IL6, TNF, IL1B, IL1A, SOD2	75	38	12971	22.7561	0.118136	0.00139588	0.107024
GAD_DISEASE	kidney failure, chronic	8	8.79121	6.5208e-05	PLAT, ICAM1, IL6, TNF, MMP9, EDN1, SERPINA3, IL1B	75	177	12971	7.8168	0.123475	0.00144719	0.112191
GAD_DISEASE	preeclampsia	6	6.59341	6.66687e-05	IL6, TNF, MMP9, ITGB3, IL1A, SOD2	75	75	12971	13.8357	0.126059	0.00146351	0.114703
GAD_DISEASE	Infection|Inflammation|Premature Birth	7	7.69231	7.701e-05	PLAT, IL6, TNF, MMP9, TLR2, IL1B, IL1A	75	125	12971	9.68501	0.144135	0.00167218	0.132484
GAD_DISEASE	Tuberculosis|Tuberculosis, Pulmonary	4	4.3956	7.72076e-05	TNF, TLR2, IL1B, IL1A	75	15	12971	46.1191	0.144477	0.00165865	0.132823
GAD_DISEASE	thromboembolism, venous	5	5.49451	8.42435e-05	PLAT, IL6, TNF, IL1B, ITGB3	75	41	12971	21.0911	0.156557	0.00179064	0.144919
GAD_DISEASE	Malaria, Falciparum	5	5.49451	8.42435e-05	ICAM1, TNF, TLR2, LTB, IL1A	75	41	12971	21.0911	0.156557	0.00179064	0.144919
GAD_DISEASE	Connective Tissue Diseases|Fetal Diseases|Inflammation|Musculoskeletal Diseases|Pregnancy Complications, Hematologic|Premature Birth|Skin Diseases	7	7.69231	8.78532e-05	PLAT, IL6, TNF, MMP9, TLR2, IL1B, IL1A	75	128	12971	9.45802	0.162689	0.00184786	0.151124
GAD_DISEASE	Inflammation|Premature Birth	7	7.69231	8.78532e-05	PLAT, IL6, TNF, MMP9, TLR2, IL1B, IL1A	75	128	12971	9.45802	0.162689	0.00184786	0.151124
GAD_DISEASE	pemphigus vulgaris	4	4.3956	9.46355e-05	IL6, TNF, IL1B, IL1A	75	16	12971	43.2367	0.174088	0.00196989	0.162782
GAD_DISEASE	Chronic Periodontitis	4	4.3956	9.46355e-05	IL6, TNF, IL1B, IL1A	75	16	12971	43.2367	0.174088	0.00196989	0.162782
GAD_DISEASE	recurrent pregnancy loss	4	4.3956	9.46355e-05	IL6, TNF, IL1B, ITGB3	75	16	12971	43.2367	0.174088	0.00196989	0.162782
GAD_DISEASE	Asphyxia Neonatorum|Brain Ischemia|Hypoxia-Ischemia, Brain	3	3.2967	9.59737e-05	IL6, TNF, IL1B	75	3	12971	172.947	0.176319	0.00197735	0.165082
GAD_DISEASE	Critical Illness|	3	3.2967	9.59737e-05	IL6, TNF, IL1B	75	3	12971	172.947	0.176319	0.00197735	0.165082
GAD_DISEASE	Alveolar Bone Loss	3	3.2967	9.59737e-05	TNF, IL1B, IL1A	75	3	12971	172.947	0.176319	0.00197735	0.165082
GAD_DISEASE	Glossitis, Benign Migratory	3	3.2967	9.59737e-05	IL6, TNF, IL1B	75	3	12971	172.947	0.176319	0.00197735	0.165082
GAD_DISEASE	Osteomyelitis|Unspecified osteomyelitis NOS	3	3.2967	9.59737e-05	TNF, IL1B, IL1A	75	3	12971	172.947	0.176319	0.00197735	0.165082
GAD_DISEASE	diabetes, type 1	8	8.79121	9.85133e-05	IL6, FAM167A, TNF, CFB, TLR2, TNFAIP3, IL1A, SOD2	75	189	12971	7.32049	0.180536	0.00200914	0.169447
GAD_DISEASE	Helicobacter Infections|Stomach Neoplasms	5	5.49451	0.00010178	IL6, TNF, TLR2, IL1B, IL1A	75	43	12971	20.1101	0.18593	0.00205497	0.175062
GAD_DISEASE	Bone Mineral Density	11	12.0879	0.000107297	LIF, CSF3, IRAK2, CSF2, IL6, TNF, CYP27B1, MMP9, IL1B, TNFAIP3, IL1A	75	411	12971	4.62874	0.194956	0.00214481	0.184542
GAD_DISEASE	hepatitis C, chronic	6	6.59341	0.000108254	IL6, TNF, SOCS3, TLR2, IL1B, MX1	75	83	12971	12.5022	0.196512	0.00214273	0.186187
GAD_DISEASE	Hodgkin Disease|Leukemia, Lymphocytic, Chronic, B-Cell|Lymphoproliferative Disorders|Waldenstrom Macroglobulinemia	7	7.69231	0.000108601	ICAM1, TNF, BCL2A1, TLR2, IL1B, TNFSF14, IL1A	75	133	12971	9.10246	0.197075	0.00212874	0.186783
GAD_DISEASE	mood disorders	5	5.49451	0.000111477	IL6, TNF, EDN1, IL1B, IL1A	75	44	12971	19.653	0.20173	0.00216408	0.191725
GAD_DISEASE	diabetic nephropathy	5	5.49451	0.000132856	TNF, CYP27B1, EDN1, IL1B, SOD2	75	46	12971	18.7986	0.23549	0.00255407	0.228455
GAD_DISEASE	cervical cancer	6	6.59341	0.000135352	IL6, TNF, MMP9, TLR2, IL1B, SOD2	75	87	12971	11.9274	0.239337	0.00257747	0.232741
GAD_DISEASE	multiple myeloma	7	7.69231	0.000155636	ICAM1, IL6, TNF, TLR2, IL1B, TNFSF14, IL1A	75	142	12971	8.52554	0.269893	0.00293554	0.267576
GAD_DISEASE	hypertension	14	15.3846	0.000156363	PLAT, IL6, TNF, GBP5, MMP9, EDN1, ITGB3, SOD2, PSMB9, SAA1, SERPINA3, VNN1, IL1B, IL1A	75	705	12971	3.4344	0.270966	0.00292197	0.268825
GAD_DISEASE	seizures, febrile	4	4.3956	0.00016175	IL6, TNF, IL1B, IL1A	75	19	12971	36.4098	0.278861	0.00299481	0.278075
GAD_DISEASE	Lichen Planus, Oral	4	4.3956	0.00016175	IL6, TNF, IL1B, IL1A	75	19	12971	36.4098	0.278861	0.00299481	0.278075
GAD_DISEASE	Purpura, Thrombocytopenic, Idiopathic|Werlhof's disease	4	4.3956	0.00016175	IL6, TNF, TLR2, IL1B	75	19	12971	36.4098	0.278861	0.00299481	0.278075
GAD_DISEASE	Atopy	5	5.49451	0.000170284	IL6, TNF, EDN1, IL1B, IL1A	75	49	12971	17.6476	0.291194	0.00312396	0.292726
GAD_DISEASE	Mucocutaneous Lymph Node Syndrome	5	5.49451	0.000184296	IL6, FAM167A, TNF, IL1B, IL1A	75	50	12971	17.2947	0.310989	0.00335021	0.316778
GAD_DISEASE	Graft vs Host Disease|Hematologic Neoplasms|Neoplasm Recurrence, Local	4	4.3956	0.000189516	IL6, TNF, IL1B, IL1A	75	20	12971	34.5893	0.31822	0.00341423	0.325735
GAD_DISEASE	giant cell arteritis	4	4.3956	0.000189516	ICAM1, TNF, MMP9, IL1A	75	20	12971	34.5893	0.31822	0.00341423	0.325735
GAD_DISEASE	Burns|Multiple Organ Failure|Shock	3	3.2967	0.000191237	IL6, TNF, IL1B	75	4	12971	129.71	0.320588	0.00341475	0.328689
GAD_DISEASE	inflammatory response, trauma induced	3	3.2967	0.000191237	IL6, TNF, IL1A	75	4	12971	129.71	0.320588	0.00341475	0.328689
GAD_DISEASE	Aneurysm, Ruptured|Aortic Aneurysm, Abdominal	3	3.2967	0.000191237	IL6, TNF, IL1B	75	4	12971	129.71	0.320588	0.00341475	0.328689
GAD_DISEASE	Dermatitis, Allergic Contact|Dermatitis, Atopic|Eczema allergic	3	3.2967	0.000191237	IL6, TNF, IL1B	75	4	12971	129.71	0.320588	0.00341475	0.328689
GAD_DISEASE	Diabetes mellitus type II|Diabetes Mellitus, Type 2|Diabetic Nephropathies|Diabetic Nephropathy|Inflammation	3	3.2967	0.000191237	IL6, TNF, IL1B	75	4	12971	129.71	0.320588	0.00341475	0.328689
GAD_DISEASE	coal workers pneumoconiosis	3	3.2967	0.000191237	TNF, IL1B, IL1A	75	4	12971	129.71	0.320588	0.00341475	0.328689
GAD_DISEASE	Pneumoconiosis|Silicosis	3	3.2967	0.000191237	TNF, IL1B, IL1A	75	4	12971	129.71	0.320588	0.00341475	0.328689
GAD_DISEASE	Bone Diseases, Metabolic|Osteoporosis, Postmenopausal	3	3.2967	0.000191237	IL6, IL1B, IL1A	75	4	12971	129.71	0.320588	0.00341475	0.328689
GAD_DISEASE	Aortic Aneurysm, Abdominal|Aortic Rupture	3	3.2967	0.000191237	IL6, TNF, IL1B	75	4	12971	129.71	0.320588	0.00341475	0.328689
GAD_DISEASE	Critical Illness|Multiple Organ Failure|Systemic inflam response synd|Systemic Inflammatory Response Syndrome	3	3.2967	0.000191237	IL6, TNF, IL1B	75	4	12971	129.71	0.320588	0.00341475	0.328689
GAD_DISEASE	Erythema	3	3.2967	0.000191237	TNF, IL1B, IL1A	75	4	12971	129.71	0.320588	0.00341475	0.328689
GAD_DISEASE	Infection|Kidney Failure, Acute	3	3.2967	0.000191237	IL6, TNF, IL1B	75	4	12971	129.71	0.320588	0.00341475	0.328689
GAD_DISEASE	Aortic Aneurysm, Abdominal|Inflammation|Postoperative Complications	3	3.2967	0.000191237	IL6, TNF, IL1B	75	4	12971	129.71	0.320588	0.00341475	0.328689
GAD_DISEASE	Dental Plaque|Gingivitis	3	3.2967	0.000191237	IL6, IL1B, IL1A	75	4	12971	129.71	0.320588	0.00341475	0.328689
GAD_DISEASE	asthma; lipids; C-reactive protein; obesity; glucose; leptin; atopy	3	3.2967	0.000191237	IL6, TNF, IL1B	75	4	12971	129.71	0.320588	0.00341475	0.328689
GAD_DISEASE	inflammatory bowel disease	5	5.49451	0.000199122	ICAM1, TNF, C3, IL1B, ITGB3	75	51	12971	16.9556	0.331331	0.00352418	0.34222
GAD_DISEASE	Leukemia, Lymphocytic, Chronic, B-Cell	8	8.79121	0.000200812	ICAM1, IL6, TNF, MMP9, EDN1, IL1B, IL1A, SOD2	75	212	12971	6.52629	0.333611	0.00352319	0.345119
GAD_DISEASE	stomach cancer	6	6.59341	0.000215175	IL6, TNF, MMP9, IL1B, IL1A, SOD2	75	96	12971	10.8092	0.352681	0.00374226	0.369761
GAD_DISEASE	lymphoproliferative disorders	4	4.3956	0.000220197	IL6, TNF, ITGB3, IL1A	75	21	12971	32.9422	0.359219	0.00379677	0.378375
GAD_DISEASE	graft versus host disease	4	4.3956	0.000220197	IL6, TNF, IL1B, IL1A	75	21	12971	32.9422	0.359219	0.00379677	0.378375
GAD_DISEASE	Premature Birth	6	6.59341	0.000236964	PLAT, ICAM1, IL6, TNF, IL1B, IL1A	75	98	12971	10.5886	0.380574	0.00405077	0.407132
GAD_DISEASE	Tuberculosis	6	6.59341	0.000260394	IL6, TNF, C3, TLR2, IL1B, IL1A	75	100	12971	10.3768	0.409228	0.00441313	0.447302
GAD_DISEASE	chronic obstructive pulmonary disease/COPD	5	5.49451	0.000267119	IL6, TNF, MMP9, SERPINA3, IL1B	75	55	12971	15.7224	0.417205	0.00448922	0.458829
GAD_DISEASE	Irritable Bowel Syndrome	4	4.3956	0.000290816	IL6, TNF, IL1B, IL1A	75	23	12971	30.0777	0.444466	0.00484628	0.499438
GAD_DISEASE	Rheumatic Heart Disease	4	4.3956	0.000290816	TNF, TLR2, IL1B, TNFAIP3	75	23	12971	30.0777	0.444466	0.00484628	0.499438
GAD_DISEASE	non-Hodgkin's lymphoma	4	4.3956	0.000290816	IL6, TNF, IL1B, IL1A	75	23	12971	30.0777	0.444466	0.00484628	0.499438
GAD_DISEASE	acute pancreatitis	3	3.2967	0.00031755	IL6, TLR2, IL1B	75	5	12971	103.768	0.473693	0.00524742	0.545231
GAD_DISEASE	vulvar cancer	3	3.2967	0.00031755	IL6, IL1B, IL1A	75	5	12971	103.768	0.473693	0.00524742	0.545231
GAD_DISEASE	stroke, lacunar	3	3.2967	0.00031755	PLAT, IL6, ITGB3	75	5	12971	103.768	0.473693	0.00524742	0.545231
GAD_DISEASE	AIDS Dementia Complex|HIV Infections	3	3.2967	0.00031755	TNF, IL1B, IL1A	75	5	12971	103.768	0.473693	0.00524742	0.545231
GAD_DISEASE	Burns|Shock, Septic	3	3.2967	0.00031755	IL6, TNF, IL1B	75	5	12971	103.768	0.473693	0.00524742	0.545231
GAD_DISEASE	Cachexia|Esophageal Neoplasms|Stomach Neoplasms	3	3.2967	0.00031755	IL6, TNF, IL1B	75	5	12971	103.768	0.473693	0.00524742	0.545231
GAD_DISEASE	Dermatitis, Atopic|Dermatitis, Irritant|Dermatitis, Occupational|Hand Dermatoses	3	3.2967	0.00031755	TNF, IL1B, IL1A	75	5	12971	103.768	0.473693	0.00524742	0.545231
GAD_DISEASE	Nasal Polyps|Rhinitis|Sinusitis	3	3.2967	0.00031755	TNF, IL1B, IL1A	75	5	12971	103.768	0.473693	0.00524742	0.545231
GAD_DISEASE	Inflammation|Inflammatory bowel disease, NOS|Inflammatory Bowel Diseases	3	3.2967	0.00031755	IL6, TNF, IL1B	75	5	12971	103.768	0.473693	0.00524742	0.545231
GAD_DISEASE	Encephalitis, Tick-Borne|Tick-Borne Encephalitis	3	3.2967	0.00031755	OAS3, OAS1, OAS2	75	5	12971	103.768	0.473693	0.00524742	0.545231
GAD_DISEASE	Hepatitis C, Chronic|Viremia	3	3.2967	0.00031755	TNF, IL1B, IL1A	75	5	12971	103.768	0.473693	0.00524742	0.545231
GAD_DISEASE	Arthritis, Juvenile Rheumatoid|Arthritis, Rheumatoid|Chronic Childhood Arthritis|Periodontitis|Rheumatoid Arthritis	3	3.2967	0.00031755	TNF, IL1B, IL1A	75	5	12971	103.768	0.473693	0.00524742	0.545231
GAD_DISEASE	cytokine production	3	3.2967	0.00031755	IL6, TNF, IL1B	75	5	12971	103.768	0.473693	0.00524742	0.545231
GAD_DISEASE	noncardia gastric cancer	3	3.2967	0.00031755	IL6, TNF, IL1B	75	5	12971	103.768	0.473693	0.00524742	0.545231
GAD_DISEASE	appendicitis	3	3.2967	0.00031755	IL6, TNF, IL1B	75	5	12971	103.768	0.473693	0.00524742	0.545231
GAD_DISEASE	Severe Acute Respiratory Syndrome	4	4.3956	0.000331003	TNF, CXCL5, OAS1, MX1	75	24	12971	28.8244	0.487814	0.0054248	0.568268
GAD_DISEASE	POLYCYSTIC OVARIAN SYNDROME|Polycystic Ovary Syndrome	5	5.49451	0.000350382	INHBA, IL6, TNF, IL1B, IL1A	75	59	12971	14.6565	0.507492	0.00569538	0.601443
GAD_DISEASE	Abortion, Spontaneous	6	6.59341	0.000388331	LIF, IL6, TNF, CFB, EDN1, IL1B	75	109	12971	9.52	0.543867	0.00626008	0.66638
GAD_DISEASE	Psoriasis	7	7.69231	0.000424497	IL6, TNF, EDN1, PI3, TNFAIP3, TNIP1, PSMB9	75	171	12971	7.07969	0.576029	0.0067871	0.728227
GAD_DISEASE	Pemphigus	4	4.3956	0.000472511	IL6, TNF, IL1B, IL1A	75	27	12971	25.6217	0.615253	0.00749281	0.81028
GAD_DISEASE	Carcinoma, Squamous Cell|Mouth Neoplasms|Squamous cell carcinoma	4	4.3956	0.000472511	TNF, IL1B, MMP13, IL1A	75	27	12971	25.6217	0.615253	0.00749281	0.81028
GAD_DISEASE	Helicobacter Infections	4	4.3956	0.000472511	IL6, TNF, TLR2, IL1B	75	27	12971	25.6217	0.615253	0.00749281	0.81028
GAD_DISEASE	Dermatomyositis	3	3.2967	0.000474564	TNF, IL1B, IL1A	75	6	12971	86.4733	0.616847	0.00746669	0.813788
GAD_DISEASE	bacterial vaginosis	3	3.2967	0.000474564	IL6, TNF, IL1B	75	6	12971	86.4733	0.616847	0.00746669	0.813788
GAD_DISEASE	Gingivitis	3	3.2967	0.000474564	MMP9, IL1B, IL1A	75	6	12971	86.4733	0.616847	0.00746669	0.813788
GAD_DISEASE	Hemorrhagic Fever with Renal Syndrome|Pleural Effusion	3	3.2967	0.000474564	TNF, IL1B, IL1A	75	6	12971	86.4733	0.616847	0.00746669	0.813788
GAD_DISEASE	Angina, Unstable|Coronary Stenosis|Inflammation|Myocardial Infarction	3	3.2967	0.000474564	IL6, TNF, IL1A	75	6	12971	86.4733	0.616847	0.00746669	0.813788
GAD_DISEASE	Periodontal Diseases	3	3.2967	0.000474564	IL6, IL1B, IL1A	75	6	12971	86.4733	0.616847	0.00746669	0.813788
GAD_DISEASE	lung function	4	4.3956	0.00052705	TNF, MMP9, IL1B, SOD2	75	28	12971	24.7067	0.655427	0.00822528	0.903407
GAD_DISEASE	Lymphoma, Non-Hodgkin	8	8.79121	0.00053177	ICAM1, TNF, SOCS3, C3, CFB, MMP9, TLR2, SOD2	75	249	12971	5.55652	0.6587	0.00823509	0.911463
GAD_DISEASE	Osteoarthritis	5	5.49451	0.00053841	IL6, TNF, SERPINA3, IL1B, IL1A	75	66	12971	13.102	0.663252	0.00827412	0.922794
GAD_DISEASE	psoriatic arthritis	4	4.3956	0.000585463	TNF, IL1B, IL1A, SOD2	75	29	12971	23.8547	0.693815	0.00892634	1.00306
GAD_DISEASE	macular degeneration	8	8.79121	0.000598534	IL6, C3, CFB, MMP9, C1QTNF1, SERPINA3, IL1B, SOD2	75	254	12971	5.44714	0.701802	0.00905648	1.02534
GAD_DISEASE	Coronary Disease|Coronary heart disease	5	5.49451	0.000603179	ICAM1, IL6, TNF, MMP9, IL1B	75	68	12971	12.7167	0.70459	0.00905866	1.03326
GAD_DISEASE	prostate cancer	11	12.0879	0.000604762	ICAM1, INHBA, IL6, TNF, CYP27B1, MMP9, TLR2, IL1B, ITGB3, IL1A, SOD2	75	510	12971	3.73022	0.705535	0.00901536	1.03596
GAD_DISEASE	trypanosomiasis	3	3.2967	0.000661935	IL6, TNF, IL1A	75	7	12971	74.12	0.737686	0.00979155	1.13337
GAD_DISEASE	Aggressive Periodontitis|	3	3.2967	0.000661935	S100A8, IL1B, IL1A	75	7	12971	74.12	0.737686	0.00979155	1.13337
GAD_DISEASE	HIV Infections|Lipodystrophy	3	3.2967	0.000661935	IL6, TNF, IL1B	75	7	12971	74.12	0.737686	0.00979155	1.13337
GAD_DISEASE	Fetal Death	3	3.2967	0.000661935	IL6, IL1B, IL1A	75	7	12971	74.12	0.737686	0.00979155	1.13337
GAD_DISEASE	Peptic Ulcer|Stomach Neoplasms	3	3.2967	0.000661935	IL6, TNF, IL1B	75	7	12971	74.12	0.737686	0.00979155	1.13337
GAD_DISEASE	Obstetric Labor, Premature	3	3.2967	0.000661935	IL6, TNF, IL1B	75	7	12971	74.12	0.737686	0.00979155	1.13337
GAD_DISEASE	adenocarcinoma	3	3.2967	0.000661935	IL6, TNF, IL1B	75	7	12971	74.12	0.737686	0.00979155	1.13337
GAD_DISEASE	allergies; common cold	3	3.2967	0.000661935	ICAM1, IL6, TNF	75	7	12971	74.12	0.737686	0.00979155	1.13337
GAD_DISEASE	Fabry Disease	3	3.2967	0.000661935	TNF, IL1B, IL1A	75	7	12971	74.12	0.737686	0.00979155	1.13337
GAD_DISEASE	leukopenia neutropenia stomatitis thrombocytopenia	3	3.2967	0.000661935	IL6, TNF, IL1B	75	7	12971	74.12	0.737686	0.00979155	1.13337
GAD_DISEASE	Brain Ischemia|Coronary Artery Disease|Intracranial Arteriosclerosis|Myocardial Infarction|Stroke|Vasculitis	3	3.2967	0.000661935	TNF, IL1B, LTB	75	7	12971	74.12	0.737686	0.00979155	1.13337
GAD_DISEASE	Gastritis, Atrophic|Stomach Neoplasms	3	3.2967	0.000661935	TNF, IL1B, IL1A	75	7	12971	74.12	0.737686	0.00979155	1.13337
GAD_DISEASE	longevity	10	10.989	0.000669955	IRAK2, IL6, TNF, C3, BCL2A1, IL1B, ITGB3, TNFAIP3, IL1A, SOD2	75	425	12971	4.06933	0.741907	0.00983767	1.14703
GAD_DISEASE	Intervertebral Disk Displacement	4	4.3956	0.000714344	MMP9, IL1B, MMP13, IL1A	75	31	12971	22.3157	0.764066	0.0104107	1.22259
GAD_DISEASE	H. pylori infection	4	4.3956	0.000714344	IL6, TNF, IL1B, IL1A	75	31	12971	22.3157	0.764066	0.0104107	1.22259
GAD_DISEASE	Osteoarthritis, Knee	4	4.3956	0.000785024	TNF, MMP9, IL1B, IL1A	75	32	12971	21.6183	0.795494	0.0113535	1.34279
GAD_DISEASE	Acute Coronary Syndrome|	5	5.49451	0.000873585	ICAM1, IL6, TNF, IL1B, ITGB3	75	75	12971	11.5298	0.829033	0.0125371	1.4932
GAD_DISEASE	disc degeneration, intervertebral	3	3.2967	0.00087932	IL6, IL1B, IL1A	75	8	12971	64.855	0.831005	0.01253	1.50293
GAD_DISEASE	Diabetes mellitus|Myocardial Infarction	3	3.2967	0.00087932	IL6, TNF, IL1B	75	8	12971	64.855	0.831005	0.01253	1.50293
GAD_DISEASE	nasal polyps	3	3.2967	0.00087932	TNF, IL1B, IL1A	75	8	12971	64.855	0.831005	0.01253	1.50293
GAD_DISEASE	tooth loss	3	3.2967	0.00087932	IL6, TNF, IL1B	75	8	12971	64.855	0.831005	0.01253	1.50293
GAD_DISEASE	Esophageal Neoplasms|Oesophageal neoplasm|Stomach Neoplasms	3	3.2967	0.00087932	IL6, TNF, IL1B	75	8	12971	64.855	0.831005	0.01253	1.50293
GAD_DISEASE	ischemic stroke	3	3.2967	0.00087932	IL6, IL1B, IL1A	75	8	12971	64.855	0.831005	0.01253	1.50293
GAD_DISEASE	allograft rejection, heart	3	3.2967	0.00087932	IL6, TNF, IL1B	75	8	12971	64.855	0.831005	0.01253	1.50293
GAD_DISEASE	Behcet Syndrome	6	6.59341	0.000929019	ICAM1, TNF, MMP9, TLR2, IL1B, IL1A	75	132	12971	7.86121	0.847169	0.0131412	1.58724
GAD_DISEASE	Leptospirosis|Swamp fever	4	4.3956	0.00102326	IL6, TNF, IL1B, IL1A	75	35	12971	19.7653	0.873696	0.0143648	1.74692
GAD_DISEASE	Hashimoto Disease	3	3.2967	0.00112638	IL6, TNF, IL1B	75	9	12971	57.6489	0.89748	0.0156929	1.92137
GAD_DISEASE	HIV; tuberculosis; cleft lip with cleft palate; cleft lip without cleft palate	3	3.2967	0.00112638	IL6, TNF, IL1A	75	9	12971	57.6489	0.89748	0.0156929	1.92137
GAD_DISEASE	Cystic Fibrosis|	3	3.2967	0.00112638	IL6, TNF, IL1B	75	9	12971	57.6489	0.89748	0.0156929	1.92137
GAD_DISEASE	Gastritis, Atrophic|Helicobacter Infections|Metaplasia|Peptic Ulcer	3	3.2967	0.00112638	IL6, TNF, IL1B	75	9	12971	57.6489	0.89748	0.0156929	1.92137
GAD_DISEASE	herpesvirus, Kaposi sarcoma-associated	3	3.2967	0.00112638	TNF, IL1B, IL1A	75	9	12971	57.6489	0.89748	0.0156929	1.92137
GAD_DISEASE	renal graft function	3	3.2967	0.00112638	IL6, MMP9, IL1B	75	9	12971	57.6489	0.89748	0.0156929	1.92137
GAD_DISEASE	bacterial infection	3	3.2967	0.00112638	IL6, TNF, TLR2	75	9	12971	57.6489	0.89748	0.0156929	1.92137
GAD_DISEASE	Arthritis, Rheumatoid|	6	6.59341	0.00117095	ICAM1, IL6, TNF, IL1B, TNFAIP3, IL1A	75	139	12971	7.46532	0.90632	0.0161975	1.99667
GAD_DISEASE	Apoplexy|Stroke	4	4.3956	0.00120489	IL6, TNF, MMP9, IL1B	75	37	12971	18.6969	0.912538	0.0165502	2.05398
GAD_DISEASE	Behcet's disease	4	4.3956	0.00120489	TNF, TLR2, IL1A, SOD2	75	37	12971	18.6969	0.912538	0.0165502	2.05398
GAD_DISEASE	Dermatitis, Atopic|	4	4.3956	0.00130284	S100A8, S100A9, TLR2, IVL	75	38	12971	18.2049	0.928263	0.0177638	2.21919
GAD_DISEASE	leishmaniasis, cutaneous	3	3.2967	0.00140278	IL6, TNF, TLR2	75	10	12971	51.884	0.941399	0.0189864	2.3875
GAD_DISEASE	paratyphoid feber typhoid fever	3	3.2967	0.00140278	TNF, IL1B, IL1A	75	10	12971	51.884	0.941399	0.0189864	2.3875
GAD_DISEASE	Atherosclerosis|Inflammation|Retinal Vein Occlusion	3	3.2967	0.00140278	IL6, TNF, IL1B	75	10	12971	51.884	0.941399	0.0189864	2.3875
GAD_DISEASE	arthritis; diabetes, type 1; pregnancy loss, recurrent; juvenile arthritis; pemphigus; IL-1RI	3	3.2967	0.00140278	TNF, IL1B, IL1A	75	10	12971	51.884	0.941399	0.0189864	2.3875
GAD_DISEASE	hepatitis	3	3.2967	0.00140278	IL6, IL1B, IL1A	75	10	12971	51.884	0.941399	0.0189864	2.3875
GAD_DISEASE	coronary atherosclerosis	3	3.2967	0.00140278	IL6, TNF, ITGB3	75	10	12971	51.884	0.941399	0.0189864	2.3875
GAD_DISEASE	Liver Cirrhosis, Alcoholic	3	3.2967	0.00140278	TNF, IL1B, SOD2	75	10	12971	51.884	0.941399	0.0189864	2.3875
GAD_DISEASE	pneumoconiosis, coal workers'	3	3.2967	0.00140278	IL1B, IL1A, SOD2	75	10	12971	51.884	0.941399	0.0189864	2.3875
GAD_DISEASE	Leukemia, Myelogenous, Chronic, BCR-ABL Positive|Neovascularization, Pathologic	4	4.3956	0.00151344	CSF3, CSF2, IL1B, IL1A	75	40	12971	17.2947	0.953158	0.0203339	2.57353
GAD_DISEASE	Peripheral Vascular Diseases	4	4.3956	0.00151344	ICAM1, IL6, MMP9, ITGB3	75	40	12971	17.2947	0.953158	0.0203339	2.57353
GAD_DISEASE	Knee osteoarthritis	3	3.2967	0.00170818	TNF, IL1B, IL1A	75	11	12971	47.1673	0.968419	0.0227713	2.90013
GAD_DISEASE	HTLV-1 infection	3	3.2967	0.00170818	IL6, TNF, IL1B	75	11	12971	47.1673	0.968419	0.0227713	2.90013
GAD_DISEASE	Arthritis, Psoriatic|Psoriasis|Psoriatic arthropathy	3	3.2967	0.00170818	TNF, IL1B, IL1A	75	11	12971	47.1673	0.968419	0.0227713	2.90013
GAD_DISEASE	Chagas Cardiomyopathy	3	3.2967	0.00170818	TNF, IL1B, IL1A	75	11	12971	47.1673	0.968419	0.0227713	2.90013
GAD_DISEASE	Pain, Postoperative|Radius Fractures|Reflex Sympathetic Dystrophy	3	3.2967	0.00170818	IL6, TNF, IL1A	75	11	12971	47.1673	0.968419	0.0227713	2.90013
GAD_DISEASE	Kidney Calculi	3	3.2967	0.00170818	S100A8, S100A9, S100A12	75	11	12971	47.1673	0.968419	0.0227713	2.90013
GAD_DISEASE	paediatric renal allograft	3	3.2967	0.00170818	IL6, TNF, IL1B	75	11	12971	47.1673	0.968419	0.0227713	2.90013
GAD_DISEASE	Endometriosis|Uterine Diseases	3	3.2967	0.00170818	IL6, MMP9, IL1B	75	11	12971	47.1673	0.968419	0.0227713	2.90013
GAD_DISEASE	Celiac disease	6	6.59341	0.00184296	ICAM1, IL6, TNF, IL1B, TNFAIP3, IL1A	75	154	12971	6.73818	0.975961	0.0243868	3.12554
GAD_DISEASE	Osteoporosis, Postmenopausal	4	4.3956	0.00186742	IL6, TNF, IL1B, IL1A	75	43	12971	16.0881	0.977122	0.0245462	3.1664
GAD_DISEASE	Hepatopulmonary Syndrome|Liver Cirrhosis	5	5.49451	0.00202043	TNF, MMP9, EDN1, PI3, SOD2	75	94	12971	9.19929	0.983217	0.0263614	3.42161
GAD_DISEASE	alpha 1-Antitrypsin Deficiency|Lung Neoplasms|Neoplasm of lung |Pulmonary Disease, Chronic Obstructive	3	3.2967	0.00204226	IL6, TNF, SERPINA3	75	12	12971	43.2367	0.983943	0.0264721	3.45797
GAD_DISEASE	respiratory tract infections	3	3.2967	0.00204226	IL6, TNF, IL1B	75	12	12971	43.2367	0.983943	0.0264721	3.45797
GAD_DISEASE	interstitial lung diseases	3	3.2967	0.00204226	IL6, TNF, IL1A	75	12	12971	43.2367	0.983943	0.0264721	3.45797
GAD_DISEASE	Helicobacter Infections|Inflammation|Precancerous Conditions|Stomach Neoplasms	3	3.2967	0.00204226	IL6, TNF, IL1B	75	12	12971	43.2367	0.983943	0.0264721	3.45797
GAD_DISEASE	silicosis	3	3.2967	0.00240468	TNF, IL1B, IL1A	75	13	12971	39.9108	0.992294	0.0309041	4.05974
GAD_DISEASE	renal allograft rejection	3	3.2967	0.00240468	ICAM1, TNF, ITGB3	75	13	12971	39.9108	0.992294	0.0309041	4.05974
GAD_DISEASE	Carcinoma, Squamous Cell|Esophageal Neoplasms|Lymphatic Metastasis|Thoracic Neoplasms	3	3.2967	0.00240468	IL6, TNF, IL1B	75	13	12971	39.9108	0.992294	0.0309041	4.05974
GAD_DISEASE	psoriasis psoriatic arthritis	3	3.2967	0.00240468	TNF, IL1B, IL1A	75	13	12971	39.9108	0.992294	0.0309041	4.05974
GAD_DISEASE	breast cancer	10	10.989	0.00264468	ICAM1, IL6, TNF, MMP9, TLR2, IL1B, ITGB3, MMP13, IL1A, SOD2	75	518	12971	3.33874	0.995261	0.0337258	4.45629
GAD_DISEASE	hepatocellular carcinoma	4	4.3956	0.00272053	IFI27, STAT5A, IL1B, MX1	75	49	12971	14.1181	0.995936	0.0344603	4.58129
GAD_DISEASE	Bacteremia|	3	3.2967	0.00279513	IL6, TNF, TLR2	75	14	12971	37.06	0.996507	0.0351696	4.70408
GAD_DISEASE	cardiovascular disease; periodontal disease	3	3.2967	0.00279513	TNF, IL1B, IL1A	75	14	12971	37.06	0.996507	0.0351696	4.70408
GAD_DISEASE	cirrhosis	3	3.2967	0.00279513	TNF, C3, SOD2	75	14	12971	37.06	0.996507	0.0351696	4.70408
GAD_DISEASE	Measles|Mumps|Rubella	3	3.2967	0.00279513	IL6, TNF, IL1B	75	14	12971	37.06	0.996507	0.0351696	4.70408
GAD_DISEASE	Glaucoma, Open-Angle	4	4.3956	0.00288242	TNF, IL1B, IL1A, SOD2	75	50	12971	13.8357	0.997073	0.0360255	4.84757
GAD_DISEASE	plasma HDL cholesterol (HDL-C) levels	7	7.69231	0.00293632	IL6, TNF, SOCS3, STAT5A, MMP9, EDN1, IL1B	75	249	12971	4.86195	0.997376	0.0364625	4.93608
GAD_DISEASE	biliary atresia	3	3.2967	0.00321327	ICAM1, IL1B, IL1A	75	15	12971	34.5893	0.998503	0.0395952	5.38961
GAD_DISEASE	idiopathic pulmonary fibrosis	3	3.2967	0.00321327	IL6, TNF, CXCL5	75	15	12971	34.5893	0.998503	0.0395952	5.38961
GAD_DISEASE	Coronary Artery Disease|	4	4.3956	0.00322371	ICAM1, IL6, TNF, ITGB3	75	52	12971	13.3036	0.998535	0.0394813	5.40667
GAD_DISEASE	Malaria, Falciparum|Parasitemia	3	3.2967	0.00365879	TNF, TLR2, IL1B	75	16	12971	32.4275	0.999394	0.0444304	6.1149
GAD_DISEASE	common variable immunodeficiency	3	3.2967	0.00365879	IL6, IL1B, IL1A	75	16	12971	32.4275	0.999394	0.0444304	6.1149
GAD_DISEASE	Colitis, Ulcerative|Crohn Disease	3	3.2967	0.00413137	TNF, TLR2, IL1B	75	17	12971	30.52	0.999768	0.0497375	6.87853
GAD_DISEASE	respiratory syncytial virus	3	3.2967	0.00413137	ICAM1, IL6, TNF	75	17	12971	30.52	0.999768	0.0497375	6.87853
GAD_DISEASE	Chronic ulcerative colitis|Colitis, Ulcerative|Crohn Disease|Crohn's disease|Inflammatory bowel disease, NOS|Inflammatory Bowel Diseases	3	3.2967	0.00413137	ICAM1, TNF, IL1B	75	17	12971	30.52	0.999768	0.0497375	6.87853
GAD_DISEASE	pregnancy loss, recurrent	4	4.3956	0.0041822	IL6, TNF, IL1B, ITGB3	75	57	12971	12.1366	0.99979	0.0500377	6.96032
GAD_DISEASE	Type 2 diabetes	8	8.79121	0.00436979	CSF2, ICAM1, IL6, TNF, EDN1, IL1B, IL1A, SOD2	75	360	12971	3.84326	0.999857	0.051921	7.26157
GAD_DISEASE	Sleep Apnea, Obstructive	4	4.3956	0.00439243	IL6, TNF, EDN1, IL1B	75	58	12971	11.9274	0.999863	0.0518792	7.29785
GAD_DISEASE	cardiovascular disease	4	4.3956	0.00460896	PLAT, IL6, TNF, ITGB3	75	59	12971	11.7252	0.999912	0.054057	7.64432
GAD_DISEASE	Leukemia, Myelogenous, Chronic, BCR-ABL Positive	4	4.3956	0.00460896	CSF3, CSF2, IL1B, IL1A	75	59	12971	11.7252	0.999912	0.054057	7.64432
GAD_DISEASE	Apoplexy|Myocardial ischemia|Stroke	3	3.2967	0.00463069	IL6, TNF, ITGB3	75	18	12971	28.8244	0.999916	0.0539928	7.67901
GAD_DISEASE	Meningococcal Infections	3	3.2967	0.00463069	TNF, IL1B, IL1A	75	18	12971	28.8244	0.999916	0.0539928	7.67901
GAD_DISEASE	Hodgkin Disease|Inflammation	3	3.2967	0.00463069	IL6, TNF, IL1B	75	18	12971	28.8244	0.999916	0.0539928	7.67901
GAD_DISEASE	Chronic renal failure|Kidney Failure, Chronic	13	14.2857	0.00489021	PLAT, CSF2, ICAM1, IL6, TNF, MMP9, BCL2A1, EDN1, ITGB3, SOD2, IL1B, MYEOV, IL1A	75	905	12971	2.48432	0.99995	0.0566129	8.09249
GAD_DISEASE	Obesity	8	8.79121	0.00499524	INHBA, IL6, TNF, SOCS3, SLC6A14, IL1B, IL1A, SOD2	75	369	12971	3.74952	0.99996	0.0574679	8.25934
GAD_DISEASE	oxidative stress	3	3.2967	0.00515645	PLAT, TNF, SOD2	75	19	12971	27.3074	0.999971	0.0589369	8.51487
GAD_DISEASE	Aggressive Periodontitis|Alveolar Bone Loss|Chronic Periodontitis|Periodontal Attachment Loss|Periodontal Pocket|Periodontitis	3	3.2967	0.00515645	IL6, IL1B, IL1A	75	19	12971	27.3074	0.999971	0.0589369	8.51487
GAD_DISEASE	Malaria	4	4.3956	0.00529698	ICAM1, TNF, TLR2, LTB	75	62	12971	11.1578	0.999978	0.0601587	8.73707
GAD_DISEASE	meningococcal disease	3	3.2967	0.00570833	TNF, IL1B, IL1A	75	20	12971	25.942	0.999991	0.0643295	9.38458
GAD_DISEASE	Aortic Aneurysm, Abdominal	3	3.2967	0.00570833	IL6, MMP9, IL1B	75	20	12971	25.942	0.999991	0.0643295	9.38458
GAD_DISEASE	cirrhosis, biliary primary	3	3.2967	0.00570833	IL6, TNF, IL1B	75	20	12971	25.942	0.999991	0.0643295	9.38458
GAD_DISEASE	Brucellosis	3	3.2967	0.00570833	IL6, TNF, PSMB9	75	20	12971	25.942	0.999991	0.0643295	9.38458
GAD_DISEASE	Graves disease	4	4.3956	0.00604367	TNF, IL1B, IL1A, PSMB9	75	65	12971	10.6429	0.999995	0.0676131	9.90922
GAD_DISEASE	carotid atherosclerosis	3	3.2967	0.00628603	IL6, MMP9, SOD2	75	21	12971	24.7067	0.999997	0.0698506	10.2866
GAD_DISEASE	Rheumatoid spondylitis|Spondylitis, Ankylosing	3	3.2967	0.00628603	TNF, IL1B, IL1A	75	21	12971	24.7067	0.999997	0.0698506	10.2866
GAD_DISEASE	Parkinson's Disease	6	6.59341	0.00638904	IL6, TNF, SERPINA3, IL1B, IL1A, SOD2	75	206	12971	5.03728	0.999998	0.0705708	10.4466
GAD_DISEASE	Choroidal Neovascularization|Macular Degeneration	3	3.2967	0.00688924	IL6, CFB, IL1B	75	22	12971	23.5836	0.999999	0.0754893	11.2195
GAD_DISEASE	Chronic ulcerative colitis|Colitis, Ulcerative	3	3.2967	0.00688924	TNF, IL1B, IL1A	75	22	12971	23.5836	0.999999	0.0754893	11.2195
GAD_DISEASE	Cerebral Infarction	3	3.2967	0.00688924	TNF, IL1B, IL1A	75	22	12971	23.5836	0.999999	0.0754893	11.2195
GAD_DISEASE	cerebrovascular disease; sickle cell anemia	3	3.2967	0.00688924	ICAM1, TNF, ITGB3	75	22	12971	23.5836	0.999999	0.0754893	11.2195
GAD_DISEASE	Arthritis, Psoriatic|Psoriatic arthropathy	3	3.2967	0.00688924	IL6, TNF, IL1B	75	22	12971	23.5836	0.999999	0.0754893	11.2195
GAD_DISEASE	Kawasaki disease	3	3.2967	0.00688924	IL6, TNF, IL1B	75	22	12971	23.5836	0.999999	0.0754893	11.2195
GAD_DISEASE	Retinopathy of Prematurity	3	3.2967	0.00688924	TNF, IL1B, IL1A	75	22	12971	23.5836	0.999999	0.0754893	11.2195
GAD_DISEASE	lymphoma	4	4.3956	0.00742191	TNF, EDN1, TLR2, IL1B	75	70	12971	9.88267	1	0.0806695	12.0357
GAD_DISEASE	neutropenia	3	3.2967	0.00751766	IL6, TNF, IL1B	75	23	12971	22.5583	1	0.0812356	12.1816
GAD_DISEASE	Dermatitis, Atopic|Eczema allergic	3	3.2967	0.00817099	IL6, TNF, IL1B	75	24	12971	21.6183	1	0.0875391	13.1715
GAD_DISEASE	bone marrow transplantation	3	3.2967	0.00817099	ICAM1, IL6, TNF	75	24	12971	21.6183	1	0.0875391	13.1715
GAD_DISEASE	Behcet Syndrome|	3	3.2967	0.00817099	IL6, TNF, TLR2	75	24	12971	21.6183	1	0.0875391	13.1715
GAD_DISEASE	Albuminuria|Inflammation|Kidney Diseases	3	3.2967	0.00884894	TNF, IL1B, ITGB3	75	25	12971	20.7536	1	0.0939851	14.1875
GAD_DISEASE	Amyotrophic Lateral Sclerosis|Anoxia|	3	3.2967	0.00884894	INHBA, TYMP, PDGFB	75	25	12971	20.7536	1	0.0939851	14.1875
GAD_DISEASE	Bone Density	6	6.59341	0.00885066	ICAM1, IL6, TNF, MMP9, IL1B, IL1A	75	223	12971	4.65327	1	0.0935136	14.19
GAD_DISEASE	Inflammation	4	4.3956	0.00897179	IL6, TNF, IL1B, IL1A	75	75	12971	9.22382	1	0.0942466	14.3704
GAD_DISEASE	Nephrotic Syndrome	3	3.2967	0.00955121	IL6, TNF, IL1B	75	26	12971	19.9554	1	0.0995332	15.2281
GAD_DISEASE	malaria, plasmodium falciparum	3	3.2967	0.00955121	TNF, TLR2, IL1B	75	26	12971	19.9554	1	0.0995332	15.2281
GAD_DISEASE	Sudden Infant Death	3	3.2967	0.00955121	IL6, TNF, IL1B	75	26	12971	19.9554	1	0.0995332	15.2281
GAD_DISEASE	pregnancy loss	4	4.3956	0.00964081	IL6, TNF, IL1B, ITGB3	75	77	12971	8.98424	1	0.0999107	15.36
GAD_DISEASE	allergic rhinitis	3	3.2967	0.0102775	IL6, TNF, TLR2	75	27	12971	19.2163	1	0.105642	16.2919
GAD_DISEASE	esophageal cancer	4	4.3956	0.0106977	IL6, TNF, IL1B, SOD2	75	80	12971	8.64733	1	0.109186	16.9015
GAD_DISEASE	Myocardial Infarction	9	9.89011	0.0110988	PLAT, ICAM1, IL6, TNF, MMP9, SERPINA3, TLR2, ITGB3, PSMB9	75	536	12971	2.90396	1	0.112498	17.4796
GAD_DISEASE	Infection|Thrombosis	2	2.1978	0.011378	IL6, TNF	75	2	12971	172.947	1	0.114603	17.8797
GAD_DISEASE	Inflammation|Intracranial Arteriovenous Malformation|Intracranial Arteriovenous Malformations|Intracranial Hemorrhages	2	2.1978	0.011378	IL6, TNF	75	2	12971	172.947	1	0.114603	17.8797
GAD_DISEASE	gingival bleeding gingivitis	2	2.1978	0.011378	IL1B, IL1A	75	2	12971	172.947	1	0.114603	17.8797
GAD_DISEASE	Diabetes Mellitus, Type 2|Periodontitis	2	2.1978	0.011378	IL1B, IL1A	75	2	12971	172.947	1	0.114603	17.8797
GAD_DISEASE	Adenocarcinoma|Atrophy|Esophageal Neoplasms|Gastroesophageal Reflux|Helicobacter Infections|Oesophageal neoplasm	2	2.1978	0.011378	TNF, IL1B	75	2	12971	172.947	1	0.114603	17.8797
GAD_DISEASE	Epilepsy, Temporal Lobe|Seizures, Febrile	2	2.1978	0.011378	C3, MMP9	75	2	12971	172.947	1	0.114603	17.8797
GAD_DISEASE	Alzheimer's disease; Abeta load	2	2.1978	0.011378	IL1B, IL1A	75	2	12971	172.947	1	0.114603	17.8797
GAD_DISEASE	Inflammation|Lung Neoplasms|Neoplasm of lung |Postoperative Complications	2	2.1978	0.011378	IL6, TNF	75	2	12971	172.947	1	0.114603	17.8797
GAD_DISEASE	Esophagitis, Peptic|Gastritis|Helicobacter Infections|Peptic Esophagitis	2	2.1978	0.011378	TNF, IL1B	75	2	12971	172.947	1	0.114603	17.8797
GAD_DISEASE	Fatigue|Neoplasms|Sleep Disorders	2	2.1978	0.011378	IL6, TNF	75	2	12971	172.947	1	0.114603	17.8797
GAD_DISEASE	Alveolar Bone Loss|Gingival Hemorrhage|Gingival Recession|Periodontal Attachment Loss|Periodontal Pocket|Periodontitis	2	2.1978	0.011378	IL1B, IL1A	75	2	12971	172.947	1	0.114603	17.8797
GAD_DISEASE	Myocardial Infarction|Periodontitis	2	2.1978	0.011378	IL1B, IL1A	75	2	12971	172.947	1	0.114603	17.8797
GAD_DISEASE	hypertension; cirrhosis	2	2.1978	0.011378	TNF, EDN1	75	2	12971	172.947	1	0.114603	17.8797
GAD_DISEASE	Otitis Media|Respiratory Tract Infections	2	2.1978	0.011378	IL6, TNF	75	2	12971	172.947	1	0.114603	17.8797
GAD_DISEASE	Diabetes mellitus type II|Diabetes Mellitus, Type 2|Glucose Intolerance|Overweight	2	2.1978	0.011378	IL6, TNF	75	2	12971	172.947	1	0.114603	17.8797
GAD_DISEASE	Behcet Syndrome|Periodontitis|Recurrence|Stomatitis, Aphthous	2	2.1978	0.011378	IL1B, IL1A	75	2	12971	172.947	1	0.114603	17.8797
GAD_DISEASE	Aggressive Periodontitis|Periodontitis|Periodontitis, Juvenile	2	2.1978	0.011378	IL1B, IL1A	75	2	12971	172.947	1	0.114603	17.8797
GAD_DISEASE	Gastrointestinal Neoplasms|Neuroendocrine Tumors|pancreatic neoplasm|Pancreatic Neoplasms	2	2.1978	0.011378	IL6, TNF	75	2	12971	172.947	1	0.114603	17.8797
GAD_DISEASE	Edema|Inflammation|Pre-Eclampsia|Proteinuria	2	2.1978	0.011378	IL6, TNF	75	2	12971	172.947	1	0.114603	17.8797
GAD_DISEASE	Glaucoma, Angle-Closure|Glaucoma, Open-Angle|Ocular Hypertension	2	2.1978	0.011378	IL1B, IL1A	75	2	12971	172.947	1	0.114603	17.8797
GAD_DISEASE	Dental Plaque|Gingival Hemorrhage|Gingival Recession|Periodontal Attachment Loss|Periodontal Pocket|Periodontitis	2	2.1978	0.011378	IL1B, IL1A	75	2	12971	172.947	1	0.114603	17.8797
GAD_DISEASE	Dental Occlusion, Traumatic|Periodontal Attachment Loss|Periodontitis|Tooth Mobility	2	2.1978	0.011378	IL1B, IL1A	75	2	12971	172.947	1	0.114603	17.8797
GAD_DISEASE	Alveolar Bone Loss|Mandibular Diseases|Maxillary Diseases|Periodontal Diseases|Tooth Loss	2	2.1978	0.011378	IL1B, IL1A	75	2	12971	172.947	1	0.114603	17.8797
GAD_DISEASE	aggressive periodontitis	2	2.1978	0.011378	IL6, IL1A	75	2	12971	172.947	1	0.114603	17.8797
GAD_DISEASE	Alveolar Bone Loss|Arthritis, Rheumatoid|Rheumatoid Arthritis|Sjogren's Syndrome	2	2.1978	0.011378	TNF, IL1B	75	2	12971	172.947	1	0.114603	17.8797
GAD_DISEASE	limbal stem cell graft	2	2.1978	0.011378	IL6, TNF	75	2	12971	172.947	1	0.114603	17.8797
GAD_DISEASE	Alveolar Bone Loss|Dental Fistula|Periodontitis	2	2.1978	0.011378	IL1B, IL1A	75	2	12971	172.947	1	0.114603	17.8797
GAD_DISEASE	Periodontal Attachment Loss|Periodontitis|Tooth Mobility	2	2.1978	0.011378	IL1B, IL1A	75	2	12971	172.947	1	0.114603	17.8797
GAD_DISEASE	skin cancer, non-melanoma	3	3.2967	0.011801	IL6, IL1B, SOD2	75	29	12971	17.891	1	0.118042	18.4826
GAD_DISEASE	Dermatitis, Atopic	3	3.2967	0.011801	C3, TLR2, PSMB9	75	29	12971	17.891	1	0.118042	18.4826
GAD_DISEASE	Carcinoma, Squamous Cell|Mouth Neoplasms	3	3.2967	0.011801	IL6, TNF, IL1B	75	29	12971	17.891	1	0.118042	18.4826
GAD_DISEASE	Lupus	3	3.2967	0.011801	IL6, TNF, IL1B	75	29	12971	17.891	1	0.118042	18.4826
GAD_DISEASE	kidney cancer	3	3.2967	0.011801	IL6, TNF, ITGB3	75	29	12971	17.891	1	0.118042	18.4826
GAD_DISEASE	Depression	5	5.49451	0.0120773	IL6, TNF, RHCG, IL1B, SOD2	75	156	12971	5.54316	1	0.120059	18.874
GAD_DISEASE	metabolic syndrome	5	5.49451	0.0145804	TNF, C3, EDN1, IL1B, IL1A	75	165	12971	5.24081	1	0.142559	22.3406
GAD_DISEASE	esophageal adenocarcinoma	7	7.69231	0.0148979	IL6, TNF, CYP27B1, MMP9, IL1B, BIRC3, IL1A	75	351	12971	3.44908	1	0.144755	22.7702
GAD_DISEASE	retinopathy, diabetic	3	3.2967	0.0151238	ICAM1, TNF, EDN1	75	33	12971	15.7224	1	0.146101	23.0745
GAD_DISEASE	Abortion, Habitual	3	3.2967	0.0151238	IL6, TNF, IL1B	75	33	12971	15.7224	1	0.146101	23.0745
GAD_DISEASE	epithelial ovarian cancer	5	5.49451	0.0161031	ICAM1, INHBA, IL6, TNF, CYP27B1	75	170	12971	5.08667	1	0.154134	24.3807
GAD_DISEASE	Graves' disease	3	3.2967	0.0169187	ICAM1, IL6, TNF	75	35	12971	14.824	1	0.160586	25.4525
GAD_DISEASE	aging	3	3.2967	0.0169187	IL6, TNF, IL1B	75	35	12971	14.824	1	0.160586	25.4525
GAD_DISEASE	benzene toxicity	3	3.2967	0.0169187	CSF3, TNF, IL1A	75	35	12971	14.824	1	0.160586	25.4525
GAD_DISEASE	Periodontal Pocket|Periodontitis	2	2.1978	0.017019	IL1B, IL1A	75	3	12971	115.298	1	0.160718	25.5832
GAD_DISEASE	Epstein-Barr Virus Infections|Hematologic Diseases	2	2.1978	0.017019	IL1B, IL1A	75	3	12971	115.298	1	0.160718	25.5832
GAD_DISEASE	bone mineral density | osteoporosis	2	2.1978	0.017019	IL6, IL1B	75	3	12971	115.298	1	0.160718	25.5832
GAD_DISEASE	Dental Plaque|Disease Susceptibility|Gingivitis	2	2.1978	0.017019	IL6, TNF	75	3	12971	115.298	1	0.160718	25.5832
GAD_DISEASE	stomach cancer; gastritis	2	2.1978	0.017019	TNF, IL1B	75	3	12971	115.298	1	0.160718	25.5832
GAD_DISEASE	Dermatitis, Irritant|	2	2.1978	0.017019	IL1B, IL1A	75	3	12971	115.298	1	0.160718	25.5832
GAD_DISEASE	Aortic Aneurysm, Abdominal|Arteriosclerosis	2	2.1978	0.017019	IL1B, IL1A	75	3	12971	115.298	1	0.160718	25.5832
GAD_DISEASE	Ache, Low Back|Intervertebral Disk Displacement|Low Back Pain	2	2.1978	0.017019	IL1B, IL1A	75	3	12971	115.298	1	0.160718	25.5832
GAD_DISEASE	lipid profile	2	2.1978	0.017019	IL6, TNF	75	3	12971	115.298	1	0.160718	25.5832
GAD_DISEASE	Bronchitis, Chronic|Bronchopneumonia|Chronic bronchitis |Communicable Diseases	2	2.1978	0.017019	IL6, TNF	75	3	12971	115.298	1	0.160718	25.5832
GAD_DISEASE	Bacterial Vaginosis|Vaginosis, Bacterial	2	2.1978	0.017019	TNF, IL1B	75	3	12971	115.298	1	0.160718	25.5832
GAD_DISEASE	Apoplexy|Brain Ischemia|Encephalitis|Stroke	2	2.1978	0.017019	TNF, IL1B	75	3	12971	115.298	1	0.160718	25.5832
GAD_DISEASE	Alveolar Bone Loss|Coronary Disease|Diabetes Complications|Periodontitis|Tooth Loss	2	2.1978	0.017019	IL1B, IL1A	75	3	12971	115.298	1	0.160718	25.5832
GAD_DISEASE	Acute Lung Injury|Inflammation	2	2.1978	0.017019	IL6, TNF	75	3	12971	115.298	1	0.160718	25.5832
GAD_DISEASE	Duodenal Ulcer|Gastrointestinal Diseases|Helicobacter Infections|Stomach Neoplasms|Stomach Ulcer|stomach; ulcer	2	2.1978	0.017019	TNF, IL1B	75	3	12971	115.298	1	0.160718	25.5832
GAD_DISEASE	Amyloidosis|Familial Mediterranean Fever	2	2.1978	0.017019	IL6, TNF	75	3	12971	115.298	1	0.160718	25.5832
GAD_DISEASE	dysthymia	2	2.1978	0.017019	IL1B, IL1A	75	3	12971	115.298	1	0.160718	25.5832
GAD_DISEASE	pesticide exposure | vaccination response	2	2.1978	0.017019	IL1B, IL1A	75	3	12971	115.298	1	0.160718	25.5832
GAD_DISEASE	C-reactive protein	2	2.1978	0.017019	IL6, TNF	75	3	12971	115.298	1	0.160718	25.5832
GAD_DISEASE	Aspergillosis|Hematologic Neoplasms|Lung Diseases, Fungal	2	2.1978	0.017019	IL1B, IL1A	75	3	12971	115.298	1	0.160718	25.5832
GAD_DISEASE	Bone Diseases|Degenerative arthropathy |Osteoarthritis	2	2.1978	0.017019	IL1B, IL1A	75	3	12971	115.298	1	0.160718	25.5832
GAD_DISEASE	thryoiditis, subacute granulomatous	2	2.1978	0.017019	TNF, IL1B	75	3	12971	115.298	1	0.160718	25.5832
GAD_DISEASE	Inflammation|Migraine Disorders	2	2.1978	0.017019	IL1B, IL1A	75	3	12971	115.298	1	0.160718	25.5832
GAD_DISEASE	Obesity|Sleep Apnea, Obstructive	2	2.1978	0.017019	IL6, EDN1	75	3	12971	115.298	1	0.160718	25.5832
GAD_DISEASE	chronic atrophic gastritis and gastric carcinoma	2	2.1978	0.017019	TNF, IL1B	75	3	12971	115.298	1	0.160718	25.5832
GAD_DISEASE	Early Onset Periodontitis	2	2.1978	0.017019	IL1B, IL1A	75	3	12971	115.298	1	0.160718	25.5832
GAD_DISEASE	Esophagitis|Gastritis, Atrophic|Gastroesophageal Reflux|Helicobacter Infections	2	2.1978	0.017019	TNF, IL1B	75	3	12971	115.298	1	0.160718	25.5832
GAD_DISEASE	Brain Injuries|Nerve Degeneration	2	2.1978	0.017019	IL1B, IL1A	75	3	12971	115.298	1	0.160718	25.5832
GAD_DISEASE	Pulmonary Fibrosis|Sarcoidosis, Pulmonary	2	2.1978	0.017019	IL1B, IL1A	75	3	12971	115.298	1	0.160718	25.5832
GAD_DISEASE	chronic immune thrombocytopenic purpura.	2	2.1978	0.017019	TNF, IL1B	75	3	12971	115.298	1	0.160718	25.5832
GAD_DISEASE	amyloidosis; Familial Mediterranean Fever	2	2.1978	0.017019	SAA2, SAA1	75	3	12971	115.298	1	0.160718	25.5832
GAD_DISEASE	Death|Sudden Infant Death	2	2.1978	0.017019	IL1B, IL1A	75	3	12971	115.298	1	0.160718	25.5832
GAD_DISEASE	Blood Coagulation Disorders|Inflammation|Nervous System Diseases	2	2.1978	0.017019	IL6, IL1B	75	3	12971	115.298	1	0.160718	25.5832
GAD_DISEASE	thrombosis	3	3.2967	0.0178485	PLAT, ICAM1, ITGB3	75	36	12971	14.4122	1	0.167151	26.6569
GAD_DISEASE	nasopharyngeal cancer	3	3.2967	0.0178485	TNF, MMP9, MMP13	75	36	12971	14.4122	1	0.167151	26.6569
GAD_DISEASE	Gout	3	3.2967	0.0187996	IL6, TNF, IL1B	75	37	12971	14.0227	1	0.17451	27.87
GAD_DISEASE	Crohn's disease; ulcerative colitis	3	3.2967	0.0187996	ICAM1, TNF, IL1B	75	37	12971	14.0227	1	0.17451	27.87
GAD_DISEASE	Hypersensitivity	3	3.2967	0.0187996	TNF, TLR2, IL1B	75	37	12971	14.0227	1	0.17451	27.87
GAD_DISEASE	melanoma	4	4.3956	0.0189157	IL6, MMP9, IL1B, MX2	75	99	12971	6.98774	1	0.174705	28.0168
GAD_DISEASE	Breast Cancer	9	9.89011	0.020241	IL6, TNF, STAT5A, MMP9, IL1B, ITGB3, MMP13, IL1A, SOD2	75	598	12971	2.60288	1	0.185017	29.6725
GAD_DISEASE	Crohn Disease|	3	3.2967	0.0217776	IL6, TNF, IL1B	75	40	12971	12.971	1	0.196844	31.5472
GAD_DISEASE	normal variation	6	6.59341	0.0220468	IL6, TNF, EDN1, IL1B, ITGB3, IL1A	75	281	12971	3.69281	1	0.19817	31.8707
GAD_DISEASE	leukemia, acute myeloid; longevity; myelodysplasia	2	2.1978	0.0226282	IL6, TNF	75	4	12971	86.4733	1	0.201997	32.5646
GAD_DISEASE	Cardiovascular Diseases|Lupus Erythematosus, Systemic	2	2.1978	0.0226282	IL6, IL1B	75	4	12971	86.4733	1	0.201997	32.5646
GAD_DISEASE	Rhabdomyolysis	2	2.1978	0.0226282	IL6, TNF	75	4	12971	86.4733	1	0.201997	32.5646
GAD_DISEASE	Bacterial Vaginosis|Fetal Membranes, Premature Rupture|Vaginosis, Bacterial	2	2.1978	0.0226282	MMP9, IL1B	75	4	12971	86.4733	1	0.201997	32.5646
GAD_DISEASE	Periodontal Attachment Loss|Periodontitis	2	2.1978	0.0226282	TNF, IL1A	75	4	12971	86.4733	1	0.201997	32.5646
GAD_DISEASE	insulin; diabetes, type 1	2	2.1978	0.0226282	TNF, SOCS3	75	4	12971	86.4733	1	0.201997	32.5646
GAD_DISEASE	anemia C-reactive protein	2	2.1978	0.0226282	IL6, TNF	75	4	12971	86.4733	1	0.201997	32.5646
GAD_DISEASE	Gastroesophageal Reflux|Helicobacter Infections	2	2.1978	0.0226282	TNF, IL1B	75	4	12971	86.4733	1	0.201997	32.5646
GAD_DISEASE	Nasal Polyps|Recurrence|Rhinitis|Sinusitis	2	2.1978	0.0226282	TNF, TNFAIP3	75	4	12971	86.4733	1	0.201997	32.5646
GAD_DISEASE	Alzheimer Disease|Alzheimer's Disease|Dementia	2	2.1978	0.0226282	IL6, IL1B	75	4	12971	86.4733	1	0.201997	32.5646
GAD_DISEASE	Diabetes Mellitus|Heart Failure|Myocardial Infarction|Peripheral Vascular Diseases	2	2.1978	0.0226282	TNF, EDN1	75	4	12971	86.4733	1	0.201997	32.5646
GAD_DISEASE	Lung Diseases, Obstructive|Scleroderma, Systemic|Systemic Scleroderma	2	2.1978	0.0226282	IL1B, IL1A	75	4	12971	86.4733	1	0.201997	32.5646
GAD_DISEASE	Common Cold|	2	2.1978	0.0226282	IL6, TNF	75	4	12971	86.4733	1	0.201997	32.5646
GAD_DISEASE	Precancerous Conditions|Stomach Neoplasms	2	2.1978	0.0226282	TNF, IL1B	75	4	12971	86.4733	1	0.201997	32.5646
GAD_DISEASE	Hip Fractures|Osteoporosis, Postmenopausal	2	2.1978	0.0226282	IL6, IL1A	75	4	12971	86.4733	1	0.201997	32.5646
GAD_DISEASE	Common Cold|Otitis Media|Picornaviridae Infections	2	2.1978	0.0226282	IL6, TNF	75	4	12971	86.4733	1	0.201997	32.5646
GAD_DISEASE	stroke, hemorrhagic stroke, ischemic	2	2.1978	0.0226282	IL6, TNF	75	4	12971	86.4733	1	0.201997	32.5646
GAD_DISEASE	Alzheimer Disease|Alzheimer's Disease|Dementia, Vascular	2	2.1978	0.0226282	IL1B, IL1A	75	4	12971	86.4733	1	0.201997	32.5646
GAD_DISEASE	fat mass	2	2.1978	0.0226282	IL1B, IL1A	75	4	12971	86.4733	1	0.201997	32.5646
GAD_DISEASE	gastroenteritis	2	2.1978	0.0226282	IL6, IL1B	75	4	12971	86.4733	1	0.201997	32.5646
GAD_DISEASE	Glomerulonephritis, IGA|Kidney Failure, Chronic	2	2.1978	0.0226282	IL6, TNF	75	4	12971	86.4733	1	0.201997	32.5646
GAD_DISEASE	Arthritis, Rheumatoid|Hypertension	2	2.1978	0.0226282	IL6, EDN1	75	4	12971	86.4733	1	0.201997	32.5646
GAD_DISEASE	Thinness	2	2.1978	0.0226282	IL6, IL1B	75	4	12971	86.4733	1	0.201997	32.5646
GAD_DISEASE	morbidity mortality	2	2.1978	0.0226282	IL6, IL1B	75	4	12971	86.4733	1	0.201997	32.5646
GAD_DISEASE	Hypertension, Pulmonary|Pulmonary Disease, Chronic Obstructive	2	2.1978	0.0226282	IL6, IL1B	75	4	12971	86.4733	1	0.201997	32.5646
GAD_DISEASE	AIDS-Related Opportunistic Infections|Cytomegalovirus Retinitis|Encephalomyelitis|HIV Infections|Hypersensitivity|Mycobacterium avium-intracellulare Infection|[X]Human immunodeficiency virus disease	2	2.1978	0.0226282	IL6, TNF	75	4	12971	86.4733	1	0.201997	32.5646
GAD_DISEASE	acute rejection	2	2.1978	0.0226282	IL6, TNF	75	4	12971	86.4733	1	0.201997	32.5646
GAD_DISEASE	kidney disease; vascular disease	2	2.1978	0.0226282	IL6, TNF	75	4	12971	86.4733	1	0.201997	32.5646
GAD_DISEASE	cytomegalovirus	2	2.1978	0.0226282	IL6, TLR2	75	4	12971	86.4733	1	0.201997	32.5646
GAD_DISEASE	Alveolitis, Extrinsic Allergic|Bird Fancier's Lung|Extrinsic allergic alveolitis	2	2.1978	0.0226282	IL6, TNF	75	4	12971	86.4733	1	0.201997	32.5646
GAD_DISEASE	Inflammation|Neoplasms	2	2.1978	0.0226282	TNF, IL1B	75	4	12971	86.4733	1	0.201997	32.5646
GAD_DISEASE	Duodenal Ulcer|Gastritis|Helicobacter Infections|Stomach Neoplasms	2	2.1978	0.0226282	TNF, IL1B	75	4	12971	86.4733	1	0.201997	32.5646
GAD_DISEASE	Alphavirus Infections|Infectious Mononucleosis|Q Fever	2	2.1978	0.0226282	IL6, TNF	75	4	12971	86.4733	1	0.201997	32.5646
GAD_DISEASE	carotid plaque	2	2.1978	0.0226282	IL6, TNF	75	4	12971	86.4733	1	0.201997	32.5646
GAD_DISEASE	Carcinoma|Helicobacter Infections|Stomach Neoplasms	2	2.1978	0.0226282	TNF, IL1B	75	4	12971	86.4733	1	0.201997	32.5646
GAD_DISEASE	allograft dysfunction, renal	2	2.1978	0.0226282	IL6, TNF	75	4	12971	86.4733	1	0.201997	32.5646
GAD_DISEASE	AIDS Dementia Complex|AIDS Related Dementia Complex	2	2.1978	0.0226282	TNF, IL1B	75	4	12971	86.4733	1	0.201997	32.5646
GAD_DISEASE	Autoimmune Diseases|Pelvic Pain|Prostatitis|Syndrome	2	2.1978	0.0226282	IL6, TNF	75	4	12971	86.4733	1	0.201997	32.5646
GAD_DISEASE	Disease Models, Animal|Fever|Seizures, Febrile	2	2.1978	0.0226282	IL6, TNF	75	4	12971	86.4733	1	0.201997	32.5646
GAD_DISEASE	pharmacogenetic studies	4	4.3956	0.0231793	IL6, TNF, IL1B, ITGB3	75	107	12971	6.4653	1	0.205531	33.2162
GAD_DISEASE	Diabetes Mellitus, Type 1	4	4.3956	0.023746	IL6, TNF, CFB, IL1B	75	108	12971	6.40543	1	0.209142	33.8801
GAD_DISEASE	Carcinoma, Hepatocellular|Liver Neoplasms	3	3.2967	0.0238643	TNF, IL1B, IL1A	75	42	12971	12.3533	1	0.20918	34.0178
GAD_DISEASE	Hypercholesterolemia|LDLC levels	5	5.49451	0.0243788	ICAM1, IL6, EDN1, IL1B, IL1A	75	193	12971	4.48048	1	0.212318	34.614
GAD_DISEASE	Lymphoma, Non-Hodgkin|Lymphoma, Non-Hodgkin's	4	4.3956	0.0254912	IL6, TNF, BCL2A1, BIRC3	75	111	12971	6.23231	1	0.220033	35.8855
GAD_DISEASE	Celiac Disease|	6	6.59341	0.0258333	IRAK2, IL6, TNF, IL1B, CXCL6, IL1A	75	293	12971	3.54157	1	0.221735	36.2718
GAD_DISEASE	Coronary Artery Disease	8	8.79121	0.0259691	PLAT, IL6, TNF, MMP9, EDN1, IL1B, ITGB3, IL1A	75	510	12971	2.71289	1	0.22185	36.4246
GAD_DISEASE	cardiovascular	3	3.2967	0.0260298	IL6, IL1B, ITGB3	75	44	12971	11.7918	1	0.221393	36.4927
GAD_DISEASE	Stomach Neoplasms	4	4.3956	0.0266921	IL6, TNF, TLR2, IL1B	75	113	12971	6.12201	1	0.225474	37.2321
GAD_DISEASE	Adenocarcinoma|Stomach Neoplasms	3	3.2967	0.0271414	IL6, IL1B, IL1A	75	45	12971	11.5298	1	0.227911	37.729
GAD_DISEASE	Crohn's disease ulcerative colitis	3	3.2967	0.0271414	ICAM1, TNF, MMP9	75	45	12971	11.5298	1	0.227911	37.729
GAD_DISEASE	Graves' ophthalmopathy	2	2.1978	0.0282058	ICAM1, TNF	75	5	12971	69.1787	1	0.234863	38.8915
GAD_DISEASE	kidney graft survival	2	2.1978	0.0282058	IL6, TNF	75	5	12971	69.1787	1	0.234863	38.8915
GAD_DISEASE	Burns|Infection|Wounds and Injuries	2	2.1978	0.0282058	IL6, TNF	75	5	12971	69.1787	1	0.234863	38.8915
GAD_DISEASE	Hepatitis B|Hepatitis C|Reperfusion Injury	2	2.1978	0.0282058	IL6, TNF	75	5	12971	69.1787	1	0.234863	38.8915
GAD_DISEASE	Angina Pectoris	2	2.1978	0.0282058	ICAM1, IL6	75	5	12971	69.1787	1	0.234863	38.8915
GAD_DISEASE	Angina Pectoris|Coronary Artery Disease|Inflammation|Myocardial Infarction	2	2.1978	0.0282058	IL6, TNF	75	5	12971	69.1787	1	0.234863	38.8915
GAD_DISEASE	spinal ossification	2	2.1978	0.0282058	IL1B, IL1A	75	5	12971	69.1787	1	0.234863	38.8915
GAD_DISEASE	inflammatory markers	2	2.1978	0.0282058	IL6, TNF	75	5	12971	69.1787	1	0.234863	38.8915
GAD_DISEASE	renal transplantation, protein secretion in	2	2.1978	0.0282058	IL6, TNF	75	5	12971	69.1787	1	0.234863	38.8915
GAD_DISEASE	allograft outcome	2	2.1978	0.0282058	IL6, TNF	75	5	12971	69.1787	1	0.234863	38.8915
GAD_DISEASE	preterm labour	2	2.1978	0.0282058	TNF, IL1B	75	5	12971	69.1787	1	0.234863	38.8915
GAD_DISEASE	Occupational Diseases|Osteoarthritis	2	2.1978	0.0282058	IL1B, IL1A	75	5	12971	69.1787	1	0.234863	38.8915
GAD_DISEASE	bronchiolitis obliterans syndrome	2	2.1978	0.0282058	IL6, TNF	75	5	12971	69.1787	1	0.234863	38.8915
GAD_DISEASE	Helicobacter Infections|Precancerous Conditions|Stomach Neoplasms	2	2.1978	0.0282058	IL1B, SOD2	75	5	12971	69.1787	1	0.234863	38.8915
GAD_DISEASE	Angina Pectoris, Variant	2	2.1978	0.0282058	EDN1, SOD2	75	5	12971	69.1787	1	0.234863	38.8915
GAD_DISEASE	hepatitis C infection	2	2.1978	0.0282058	IL6, TNF	75	5	12971	69.1787	1	0.234863	38.8915
GAD_DISEASE	Chlamydia Infections|Infertility, Female	2	2.1978	0.0282058	IL6, TNF	75	5	12971	69.1787	1	0.234863	38.8915
GAD_DISEASE	parvovirus B19 infection	2	2.1978	0.0282058	IL6, TNF	75	5	12971	69.1787	1	0.234863	38.8915
GAD_DISEASE	Brucellosis|	2	2.1978	0.0282058	IL6, TNF	75	5	12971	69.1787	1	0.234863	38.8915
GAD_DISEASE	Eclampsia|Pre-Eclampsia	2	2.1978	0.0282058	IL6, TNF	75	5	12971	69.1787	1	0.234863	38.8915
GAD_DISEASE	infection, postoperative	2	2.1978	0.0282058	TNF, IL1B	75	5	12971	69.1787	1	0.234863	38.8915
GAD_DISEASE	Autoimmune Diseases|Thyroid Diseases	2	2.1978	0.0282058	IL1B, IL1A	75	5	12971	69.1787	1	0.234863	38.8915
GAD_DISEASE	cell-surface B7 expression; cytokine production	2	2.1978	0.0282058	IL6, TNF	75	5	12971	69.1787	1	0.234863	38.8915
GAD_DISEASE	parvovirus	2	2.1978	0.0282058	IL6, TNF	75	5	12971	69.1787	1	0.234863	38.8915
GAD_DISEASE	graft-vs-host disease	2	2.1978	0.0282058	IL6, TNF	75	5	12971	69.1787	1	0.234863	38.8915
GAD_DISEASE	cyclosporine	2	2.1978	0.0282058	IL6, TNF	75	5	12971	69.1787	1	0.234863	38.8915
GAD_DISEASE	Diseases in Twins|Macular Degeneration|Retinal Drusen	2	2.1978	0.0282058	C3, CFB	75	5	12971	69.1787	1	0.234863	38.8915
GAD_DISEASE	Diabetes Mellitus, Type 1|Diabetes Mellitus, Type 2|Diabetic Angiopathies	2	2.1978	0.0282058	IL6, SOD2	75	5	12971	69.1787	1	0.234863	38.8915
GAD_DISEASE	graft-versus-host disease	3	3.2967	0.0294212	IL6, TNF, IL1B	75	47	12971	11.0391	1	0.242796	40.1939
GAD_DISEASE	suicide	3	3.2967	0.0305889	TNF, IL1B, IL1A	75	48	12971	10.8092	1	0.250243	41.4204
GAD_DISEASE	liver cancer	3	3.2967	0.0305889	IL6, TNF, IL1B	75	48	12971	10.8092	1	0.250243	41.4204
GAD_DISEASE	myocardial infarct	4	4.3956	0.031795	PLAT, ICAM1, IL6, ITGB3	75	121	12971	5.71725	1	0.257832	42.6625
GAD_DISEASE	SARS (severe acute respiratory syndrome)	2	2.1978	0.0337521	TNF, MX1	75	6	12971	57.6489	1	0.270512	44.6252
GAD_DISEASE	Carcinoma, Hepatocellular|Hepatitis C, Chronic|LCC - Liver cell carcinoma|Liver neoplasms	2	2.1978	0.0337521	MMP9, IL1B	75	6	12971	57.6489	1	0.270512	44.6252
GAD_DISEASE	lupus erythematosus periodontitis	2	2.1978	0.0337521	IL1B, IL1A	75	6	12971	57.6489	1	0.270512	44.6252
GAD_DISEASE	Graft vs Host Disease|Hematologic Diseases	2	2.1978	0.0337521	IL1B, IL1A	75	6	12971	57.6489	1	0.270512	44.6252
GAD_DISEASE	Bacteremia|Gram-Negative Bacterial Infections	2	2.1978	0.0337521	TNF, IL1B	75	6	12971	57.6489	1	0.270512	44.6252
GAD_DISEASE	Arthritis, Rheumatoid|Periodontitis|Rheumatoid Arthritis	2	2.1978	0.0337521	IL1B, IL1A	75	6	12971	57.6489	1	0.270512	44.6252
GAD_DISEASE	Lymphoma, B-Cell|Lymphoma, T-Cell	2	2.1978	0.0337521	IL1B, IL1A	75	6	12971	57.6489	1	0.270512	44.6252
GAD_DISEASE	Focal segmental glomsclerosis|Glomerulosclerosis, Focal Segmental	2	2.1978	0.0337521	IL6, TNF	75	6	12971	57.6489	1	0.270512	44.6252
GAD_DISEASE	renal allograft outcome	2	2.1978	0.0337521	IL6, TNF	75	6	12971	57.6489	1	0.270512	44.6252
GAD_DISEASE	Osteomyelitis	2	2.1978	0.0337521	IL6, IL1A	75	6	12971	57.6489	1	0.270512	44.6252
GAD_DISEASE	Alzheimer's disease; Parkinson's disease; insulin; lung function; depression; longevity	2	2.1978	0.0337521	C3, CFB	75	6	12971	57.6489	1	0.270512	44.6252
GAD_DISEASE	Heart Valve Diseases|Rheumatic Heart Disease	2	2.1978	0.0337521	IL6, TNF	75	6	12971	57.6489	1	0.270512	44.6252
GAD_DISEASE	Helicobacter Infections|Purpura, Thrombocytopenic, Idiopathic	2	2.1978	0.0337521	TNF, IL1B	75	6	12971	57.6489	1	0.270512	44.6252
GAD_DISEASE	Fractures, Bone|Osteoporosis, Postmenopausal	2	2.1978	0.0337521	IL6, TNF	75	6	12971	57.6489	1	0.270512	44.6252
GAD_DISEASE	Critical Illness|Sepsis	2	2.1978	0.0337521	IL6, IL1B	75	6	12971	57.6489	1	0.270512	44.6252
GAD_DISEASE	Atherosclerosis|Obesity	2	2.1978	0.0337521	ICAM1, TNF	75	6	12971	57.6489	1	0.270512	44.6252
GAD_DISEASE	Prosthesis Failure	2	2.1978	0.0337521	IL6, TNF	75	6	12971	57.6489	1	0.270512	44.6252
GAD_DISEASE	Carcinoma, Renal Cell|Inflammation|Kidney Neoplasms|Neoplasm Metastasis	2	2.1978	0.0337521	TNF, IL1A	75	6	12971	57.6489	1	0.270512	44.6252
GAD_DISEASE	Epilepsy, Temporal Lobe|Sclerosis	2	2.1978	0.0337521	IL1B, IL1A	75	6	12971	57.6489	1	0.270512	44.6252
GAD_DISEASE	Burns|Sepsis|Systemic infection	2	2.1978	0.0337521	IL6, TNF	75	6	12971	57.6489	1	0.270512	44.6252
GAD_DISEASE	lymphoproliferative disorders, post-transplant	2	2.1978	0.0337521	IL6, TNF	75	6	12971	57.6489	1	0.270512	44.6252
GAD_DISEASE	lymphoma, malignant	2	2.1978	0.0337521	IL1B, IL1A	75	6	12971	57.6489	1	0.270512	44.6252
GAD_DISEASE	Atrophy|Peptic Ulcer	2	2.1978	0.0337521	TNF, IL1B	75	6	12971	57.6489	1	0.270512	44.6252
GAD_DISEASE	kidney graft function	2	2.1978	0.0337521	IL6, IL1B	75	6	12971	57.6489	1	0.270512	44.6252
GAD_DISEASE	Berylliosis|Respiratory Hypersensitivity	2	2.1978	0.0337521	IL1B, IL1A	75	6	12971	57.6489	1	0.270512	44.6252
GAD_DISEASE	Hepatitis C|Recurrence	2	2.1978	0.0337521	IL6, TNF	75	6	12971	57.6489	1	0.270512	44.6252
GAD_DISEASE	Graves Disease|Graves Ophthalmopathy|Graves' Disease|Thyroid associated opthalmopathies	2	2.1978	0.0337521	IL1B, IL1A	75	6	12971	57.6489	1	0.270512	44.6252
GAD_DISEASE	kidney; failure|Renal Insufficiency	2	2.1978	0.0337521	IL6, TNF	75	6	12971	57.6489	1	0.270512	44.6252
GAD_DISEASE	Apoplexy|Brain Ischemia|Stroke	3	3.2967	0.0366956	IL6, TNF, IL1B	75	53	12971	9.78943	1	0.28957	47.4584
GAD_DISEASE	Coronary Heart Disease	3	3.2967	0.0366956	IL6, TNF, IL1B	75	53	12971	9.78943	1	0.28957	47.4584
GAD_DISEASE	Adenocarcinoma|Helicobacter Infections|Stomach Neoplasms	2	2.1978	0.0392671	TNF, IL1B	75	7	12971	49.4133	1	0.305581	49.8214
GAD_DISEASE	Endotoxemia	2	2.1978	0.0392671	IL6, TNF	75	7	12971	49.4133	1	0.305581	49.8214
GAD_DISEASE	Gastritis|Helicobacter Infections	2	2.1978	0.0392671	IL6, IL1B	75	7	12971	49.4133	1	0.305581	49.8214
GAD_DISEASE	antibiotic-induced cutaneous allergic reactions	2	2.1978	0.0392671	TNF, IL1B	75	7	12971	49.4133	1	0.305581	49.8214
GAD_DISEASE	Haemolytic-uraemic syndrome|Hemolytic-Uremic Syndrome	2	2.1978	0.0392671	C3, CFB	75	7	12971	49.4133	1	0.305581	49.8214
GAD_DISEASE	severe malaria	2	2.1978	0.0392671	IL1B, IL1A	75	7	12971	49.4133	1	0.305581	49.8214
GAD_DISEASE	Cardiovascular Diseases|Obesity	2	2.1978	0.0392671	IL6, TNF	75	7	12971	49.4133	1	0.305581	49.8214
GAD_DISEASE	liver transplantation, immunosuppression after	2	2.1978	0.0392671	IL6, TNF	75	7	12971	49.4133	1	0.305581	49.8214
GAD_DISEASE	Atherosclerosis|Cardiovascular Diseases	2	2.1978	0.0392671	IL6, TNF	75	7	12971	49.4133	1	0.305581	49.8214
GAD_DISEASE	Rheumatic Diseases|Rheumatism	2	2.1978	0.0392671	TNF, IL1B	75	7	12971	49.4133	1	0.305581	49.8214
GAD_DISEASE	Carcinoma, Hepatocellular|Hepatitis B|Liver carcinoma|Liver neoplasms	2	2.1978	0.0392671	MMP9, MMP13	75	7	12971	49.4133	1	0.305581	49.8214
GAD_DISEASE	G6PD deficiency	2	2.1978	0.0392671	IL6, TNF	75	7	12971	49.4133	1	0.305581	49.8214
GAD_DISEASE	rheumatic fever	2	2.1978	0.0392671	TNF, TLR2	75	7	12971	49.4133	1	0.305581	49.8214
GAD_DISEASE	Moyamoya Disease	2	2.1978	0.0392671	MMP9, MMP13	75	7	12971	49.4133	1	0.305581	49.8214
GAD_DISEASE	Chagas Cardiomyopathy|Chagas Disease	2	2.1978	0.0392671	IL6, TNF	75	7	12971	49.4133	1	0.305581	49.8214
GAD_DISEASE	Aspergillosis|Lung Diseases, Fungal	2	2.1978	0.0392671	IL6, TNF	75	7	12971	49.4133	1	0.305581	49.8214
GAD_DISEASE	lung transplant complications	2	2.1978	0.0392671	IL6, TNF	75	7	12971	49.4133	1	0.305581	49.8214
GAD_DISEASE	hepatitis C; longevity	2	2.1978	0.0392671	IL6, IL1B	75	7	12971	49.4133	1	0.305581	49.8214
GAD_DISEASE	asthma; eczema; allergic disease	2	2.1978	0.0392671	IL6, TNF	75	7	12971	49.4133	1	0.305581	49.8214
GAD_DISEASE	amyloidosis	2	2.1978	0.0392671	TNF, SAA1	75	7	12971	49.4133	1	0.305581	49.8214
GAD_DISEASE	GLOMERULONEPHRITIS MEMBRANOUS|Glomerulonephritis, Membranous	2	2.1978	0.0392671	IL6, TNF	75	7	12971	49.4133	1	0.305581	49.8214
GAD_DISEASE	Esophageal Neoplasms|Head and Neck Neoplasms|Laryngeal Neoplasms|Mouth Neoplasms|Pharyngeal Neoplasms	3	3.2967	0.044583	TNF, TNFAIP2, SOD2	75	59	12971	8.7939	1	0.338556	54.3923
GAD_DISEASE	miscarriage	2	2.1978	0.0447511	IL6, TNF	75	8	12971	43.2367	1	0.338385	54.5302
GAD_DISEASE	Delayed Graft Function	2	2.1978	0.0447511	TNF, IL1B	75	8	12971	43.2367	1	0.338385	54.5302
GAD_DISEASE	Carcinoma, Squamous Cell|Inflammation|Mouth Neoplasms|Thrombosis	2	2.1978	0.0447511	MMP9, ITGB3	75	8	12971	43.2367	1	0.338385	54.5302
GAD_DISEASE	Glomerulonephritis, IGA|IGA Glomerulonephritides|Recurrence	2	2.1978	0.0447511	IL6, TNF	75	8	12971	43.2367	1	0.338385	54.5302
GAD_DISEASE	Carcinoma, Hepatocellular|Diabetes Complications|Diabetes Mellitus|Inflammation|Liver Neoplasms	2	2.1978	0.0447511	IL6, TNF	75	8	12971	43.2367	1	0.338385	54.5302
GAD_DISEASE	Gastritis, Atrophic|Helicobacter Infections	2	2.1978	0.0447511	TNF, IL1B	75	8	12971	43.2367	1	0.338385	54.5302
GAD_DISEASE	gastric carcinoma	2	2.1978	0.0447511	TNF, IL1B	75	8	12971	43.2367	1	0.338385	54.5302
GAD_DISEASE	Pseudoxanthoma Elasticum	2	2.1978	0.0447511	ICAM1, SOD2	75	8	12971	43.2367	1	0.338385	54.5302
GAD_DISEASE	Carcinoma, Basal Cell|Skin Basal Cell Carcinoma|Skin Neoplasms	2	2.1978	0.0447511	IL6, IL1B	75	8	12971	43.2367	1	0.338385	54.5302
GAD_DISEASE	Epilepsy, Temporal Lobe|	2	2.1978	0.0447511	IL1B, IL1A	75	8	12971	43.2367	1	0.338385	54.5302
GAD_DISEASE	Meningococcal Infections|Pneumococcal Infections	2	2.1978	0.0447511	TLR2, IL1B	75	8	12971	43.2367	1	0.338385	54.5302
GAD_DISEASE	asthma; candidiasis; high-altitude illness	2	2.1978	0.0447511	TNF, IL1B	75	8	12971	43.2367	1	0.338385	54.5302
GAD_DISEASE	Neoplasms	4	4.3956	0.0482572	TNF, MMP9, ITGB3, SOD2	75	143	12971	4.83767	1	0.358705	57.3192
GAD_DISEASE	inflammatory bowel disease	3	3.2967	0.0487413	ICAM1, TNF, IL1B	75	62	12971	8.36839	1	0.36036	57.6914
GAD_DISEASE	Metabolic Syndrome X	3	3.2967	0.0487413	IL6, TNF, IL1B	75	62	12971	8.36839	1	0.36036	57.6914
GAD_DISEASE	preterm birth	2	2.1978	0.0502042	IL6, TNF	75	9	12971	38.4326	1	0.367821	58.7975
GAD_DISEASE	Osteosarcoma	2	2.1978	0.0502042	IL6, TNF	75	9	12971	38.4326	1	0.367821	58.7975
GAD_DISEASE	Helicobacter Infections|Metaplasia	2	2.1978	0.0502042	MMP9, IL1B	75	9	12971	38.4326	1	0.367821	58.7975
GAD_DISEASE	Choroidal Neovascularization|Geographic Atrophy	2	2.1978	0.0502042	C3, CFB	75	9	12971	38.4326	1	0.367821	58.7975
GAD_DISEASE	Hodgkin Disease|Lymphoma|Lymphoma, Non-Hodgkin	2	2.1978	0.0502042	IL6, TNF	75	9	12971	38.4326	1	0.367821	58.7975
GAD_DISEASE	Fatty Liver|Insulin Resistance	2	2.1978	0.0502042	IL6, TNF	75	9	12971	38.4326	1	0.367821	58.7975
GAD_DISEASE	urolithiasis	2	2.1978	0.0502042	IL1B, SOD2	75	9	12971	38.4326	1	0.367821	58.7975
GAD_DISEASE	AIDS progression	2	2.1978	0.0502042	TNF, LTB	75	9	12971	38.4326	1	0.367821	58.7975
GAD_DISEASE	Respiratory Distress Syndrome, Adult	2	2.1978	0.0502042	IL6, PI3	75	9	12971	38.4326	1	0.367821	58.7975
GAD_DISEASE	Coronary Restenosis|Coronary Stenosis	2	2.1978	0.0502042	IL1B, IL1A	75	9	12971	38.4326	1	0.367821	58.7975
GAD_DISEASE	Alzheimer`s Disease	2	2.1978	0.0502042	IL6, SERPINA3	75	9	12971	38.4326	1	0.367821	58.7975
GAD_DISEASE	Cadaver|Infarction|Postoperative Complications|Thrombosis|Vascular Diseases	2	2.1978	0.0502042	IL6, TNF	75	9	12971	38.4326	1	0.367821	58.7975
GAD_DISEASE	Lymphocytosis|Lymphoproliferative Disorders	2	2.1978	0.0502042	TNF, IL1A	75	9	12971	38.4326	1	0.367821	58.7975
GAD_DISEASE	Cervical Intraepithelial Neoplasia|Papillomavirus Infections|Uterine Cervical Neoplasms	2	2.1978	0.0502042	IL6, TNF	75	9	12971	38.4326	1	0.367821	58.7975
GAD_DISEASE	Melanoma|Skin Neoplasms	3	3.2967	0.0515891	ICAM1, IL6, TNF	75	64	12971	8.10688	1	0.374688	59.8196
GAD_DISEASE	Graft vs Host Disease	3	3.2967	0.053035	IL6, TNF, BCL2A1	75	65	12971	7.98215	1	0.381785	60.8611
GAD_DISEASE	Amyotrophic Lateral Sclerosis|	3	3.2967	0.053035	ICAM1, TNF, ITGB3	75	65	12971	7.98215	1	0.381785	60.8611
GAD_DISEASE	dementia	3	3.2967	0.053035	IL6, TNF, MMP9	75	65	12971	7.98215	1	0.381785	60.8611
GAD_DISEASE	natural antibodies	2	2.1978	0.0556266	TNF, CFB	75	10	12971	34.5893	1	0.395231	62.6647
GAD_DISEASE	Graft vs Host Disease|Hematologic Neoplasms	2	2.1978	0.0556266	IL6, TNF	75	10	12971	34.5893	1	0.395231	62.6647
GAD_DISEASE	gastric ulcer	2	2.1978	0.0556266	PLAT, MMP9	75	10	12971	34.5893	1	0.395231	62.6647
GAD_DISEASE	COPD	2	2.1978	0.0556266	TNF, SERPINA3	75	10	12971	34.5893	1	0.395231	62.6647
GAD_DISEASE	Human Longevity	2	2.1978	0.0556266	IL6, TNF	75	10	12971	34.5893	1	0.395231	62.6647
GAD_DISEASE	Duodenal Ulcer	2	2.1978	0.0556266	TNF, IL1B	75	10	12971	34.5893	1	0.395231	62.6647
GAD_DISEASE	graft rejection, liver	2	2.1978	0.0556266	IL6, TNF	75	10	12971	34.5893	1	0.395231	62.6647
GAD_DISEASE	Cardiomyopathies	2	2.1978	0.0556266	PLAT, TNF	75	10	12971	34.5893	1	0.395231	62.6647
GAD_DISEASE	hematopoietic stem cell transplantation	2	2.1978	0.0556266	TNF, IL1B	75	10	12971	34.5893	1	0.395231	62.6647
GAD_DISEASE	C-Reactive Protein	4	4.3956	0.0586896	IL6, TNF, TLR2, IL1B	75	155	12971	4.46314	1	0.410898	64.6953
GAD_DISEASE	HIV Infections	3	3.2967	0.0589604	TNF, TLR2, IL1A	75	69	12971	7.51942	1	0.411031	64.8697
GAD_DISEASE	alcohol	3	3.2967	0.0589604	IL1B, IL1A, SOD2	75	69	12971	7.51942	1	0.411031	64.8697
GAD_DISEASE	lupus erythematosus	3	3.2967	0.0604763	IL6, TNF, IL1A	75	70	12971	7.412	1	0.417888	65.8312
GAD_DISEASE	Coronary Artery Disease|Mucocutaneous Lymph Node Syndrome	2	2.1978	0.0610184	MMP9, MMP13	75	11	12971	31.4448	1	0.419442	66.1691
GAD_DISEASE	liver disease, alcoholic	2	2.1978	0.0610184	TNF, SOD2	75	11	12971	31.4448	1	0.419442	66.1691
GAD_DISEASE	Familial Mediterranean Fever	2	2.1978	0.0610184	TNF, SAA1	75	11	12971	31.4448	1	0.419442	66.1691
GAD_DISEASE	Carcinoma, Hepatocellular|Hepatitis B, Chronic|LCC - Liver cell carcinoma|Liver neoplasms	2	2.1978	0.0610184	IL6, IL1B	75	11	12971	31.4448	1	0.419442	66.1691
GAD_DISEASE	heart transplant	2	2.1978	0.0610184	IL6, TNF	75	11	12971	31.4448	1	0.419442	66.1691
GAD_DISEASE	Cardiovascular Diseases|Inflammation	2	2.1978	0.0610184	IL6, TNF	75	11	12971	31.4448	1	0.419442	66.1691
GAD_DISEASE	Pneumonia	2	2.1978	0.0610184	TNF, TLR2	75	11	12971	31.4448	1	0.419442	66.1691
GAD_DISEASE	Diabetes Mellitus	4	4.3956	0.0614517	IL6, TNF, IRF7, SOD2	75	158	12971	4.3784	1	0.420402	66.4368
GAD_DISEASE	Diabetes Mellitus, Insulin-Dependent|Diabetes Mellitus, Type 1	3	3.2967	0.0635479	ICAM1, IL6, TNF	75	72	12971	7.20611	1	0.430079	67.7041
GAD_DISEASE	heart transplant complications	2	2.1978	0.0663799	IL6, TNF	75	12	12971	28.8244	1	0.443291	69.3448
GAD_DISEASE	Diabetes mellitus type II|Diabetes Mellitus, Type 2|Diabetic Retinopathy	2	2.1978	0.0663799	ICAM1, TNF	75	12	12971	28.8244	1	0.443291	69.3448
GAD_DISEASE	Hepatitis C, Chronic|Neutropenia|Thrombocytopenia	2	2.1978	0.0663799	IRF9, IRF7	75	12	12971	28.8244	1	0.443291	69.3448
GAD_DISEASE	Aneurysm, Ruptured|Intracranial Aneurysm|Stroke|Subarachnoid Hemorrhage	2	2.1978	0.0663799	SERPINA3, ITGB3	75	12	12971	28.8244	1	0.443291	69.3448
GAD_DISEASE	Helicobacter Infections|Peptic Ulcer	2	2.1978	0.0663799	TNF, IL1B	75	12	12971	28.8244	1	0.443291	69.3448
GAD_DISEASE	ADHD | attention deficit hyperactivity disorder	2	2.1978	0.0663799	IL6, TNF	75	12	12971	28.8244	1	0.443291	69.3448
GAD_DISEASE	Leprosy	3	3.2967	0.0682524	IL6, TNF, TLR2	75	75	12971	6.91787	1	0.451352	70.3861
GAD_DISEASE	Crohn's disease	3	3.2967	0.071451	ICAM1, TNF, TLR2	75	77	12971	6.73818	1	0.465737	72.0883
GAD_DISEASE	rhinitis	2	2.1978	0.0717112	IL1B, IL1A	75	13	12971	26.6072	1	0.465602	72.2226
GAD_DISEASE	bone mass	2	2.1978	0.0717112	IL6, TNF	75	13	12971	26.6072	1	0.465602	72.2226
GAD_DISEASE	Macular Degeneration|Vision, Low	2	2.1978	0.0717112	C3, CFB	75	13	12971	26.6072	1	0.465602	72.2226
GAD_DISEASE	Kidney Failure	2	2.1978	0.0717112	IL6, TNF	75	13	12971	26.6072	1	0.465602	72.2226
GAD_DISEASE	Pterygium	2	2.1978	0.0717112	TNF, IL1B	75	13	12971	26.6072	1	0.465602	72.2226
GAD_DISEASE	Lymphadenitis|Mycobacterium Infections|Periodontitis	2	2.1978	0.0717112	TNF, IL1B	75	13	12971	26.6072	1	0.465602	72.2226
GAD_DISEASE	Esophageal Neoplasms|Hyperglycemia|Oesophageal neoplasm	2	2.1978	0.0717112	IL6, TNF	75	13	12971	26.6072	1	0.465602	72.2226
GAD_DISEASE	rubella vaccination	2	2.1978	0.0717112	IL6, TNF	75	13	12971	26.6072	1	0.465602	72.2226
GAD_DISEASE	Giant Cell Arteritis|Temporal Arteritis	2	2.1978	0.0717112	FAM167A, TNFAIP3	75	13	12971	26.6072	1	0.465602	72.2226
GAD_DISEASE	gastric disease	2	2.1978	0.0717112	TNF, IL1B	75	13	12971	26.6072	1	0.465602	72.2226
GAD_DISEASE	Cleft Lip|Cleft Palate	6	6.59341	0.0747826	IRF9, INHBA, MMP9, EDN1, ITGB3, MMP13	75	395	12971	2.62704	1	0.478896	73.763
GAD_DISEASE	Uterine Cervical Neoplasms	2	2.1978	0.0770124	IL1B, PSMB9	75	14	12971	24.7067	1	0.487915	74.8304
GAD_DISEASE	Glomerulonephritis, IGA|IGA Glomerulonephritides	2	2.1978	0.0770124	IL6, TNF	75	14	12971	24.7067	1	0.487915	74.8304
GAD_DISEASE	Infertility, Female	2	2.1978	0.0822838	LIF, ITGB3	75	15	12971	23.0596	1	0.51039	77.1936
GAD_DISEASE	metabolism disorders	2	2.1978	0.0822838	IL6, ITGB3	75	15	12971	23.0596	1	0.51039	77.1936
GAD_DISEASE	atherosclerosis, carotid	2	2.1978	0.0822838	IL6, MMP9	75	15	12971	23.0596	1	0.51039	77.1936
GAD_DISEASE	cerebral infarct, atherothrombotic	2	2.1978	0.0822838	IL6, EDN1	75	15	12971	23.0596	1	0.51039	77.1936
GAD_DISEASE	Keratoconus	2	2.1978	0.0822838	IL1B, IL1A	75	15	12971	23.0596	1	0.51039	77.1936
GAD_DISEASE	hearing loss/deafness	2	2.1978	0.0822838	PLAT, SOD2	75	15	12971	23.0596	1	0.51039	77.1936
GAD_DISEASE	non-Hodgkin lymphoma	2	2.1978	0.0822838	IL6, SOD2	75	15	12971	23.0596	1	0.51039	77.1936
GAD_DISEASE	Pregnancy Complications	2	2.1978	0.0875254	TNF, SOD2	75	16	12971	21.6183	1	0.531708	79.3351
GAD_DISEASE	chronic fatigue syndrome	2	2.1978	0.0875254	IL6, TNF	75	16	12971	21.6183	1	0.531708	79.3351
GAD_DISEASE	hearing loss	3	3.2967	0.0881379	TNF, EDN1, SOD2	75	87	12971	5.96368	1	0.53285	79.5726
GAD_DISEASE	Stroke	7	7.69231	0.0885222	PLAT, ICAM1, IL6, TNF, MMP9, ITGB3, IL1A	75	542	12971	2.23363	1	0.533022	79.7203
GAD_DISEASE	ulcerative colitis	3	3.2967	0.0898659	TNF, TLR2, IL1B	75	88	12971	5.89591	1	0.537201	80.2288
GAD_DISEASE	Acute Coronary Syndrome|Inflammation	2	2.1978	0.0927375	MMP9, EDN1	75	17	12971	20.3467	1	0.547564	81.2756
GAD_DISEASE	brain aneurysm	2	2.1978	0.0927375	MMP9, SERPINA3	75	17	12971	20.3467	1	0.547564	81.2756
GAD_DISEASE	Myocardial Infarction|Stroke	2	2.1978	0.0927375	IL1B, ITGB3	75	17	12971	20.3467	1	0.547564	81.2756
GAD_DISEASE	Angina Pectoris|Myocardial Infarction|Obesity|Recurrence	2	2.1978	0.0927375	IL6, ITGB3	75	17	12971	20.3467	1	0.547564	81.2756
GAD_DISEASE	Emphysema	2	2.1978	0.0979203	TNF, MMP9	75	18	12971	19.2163	1	0.566742	83.0341
GAD_DISEASE	Asthma|Hypersensitivity	2	2.1978	0.0979203	C3, ADAM8	75	18	12971	19.2163	1	0.566742	83.0341
GAD_DISEASE	Respiratory Syncytial Virus Infections	2	2.1978	0.0979203	IFI27, TLR2	75	18	12971	19.2163	1	0.566742	83.0341
GAD_DISEASE	Guillain-Barre syndrome	2	2.1978	0.0979203	TNF, MMP9	75	18	12971	19.2163	1	0.566742	83.0341
