# Supplementary material for: A Network-Based Analysis Reveals the Mechanism Underlying Vitamin D in Suppressing Cytokine Storm and Virus in SARS-CoV-2 Infection
Source: Front Immunol. 2020 Dec 9;11:590459. doi: 10.3389/fimmu.2020.590459 (PMC7756074; doi:10.3389/fimmu.2020.590459)
Supplement: Supplementary file 8 [file Table_8.xlsx]

## Sheet: Up-regulated
Table S8A: Host response pathways associated up-regulated expressed genes in high viral load compared to low viral load of lungs autopsy of COVID-19 patients.
Gene	baseMean	log2FoldChange	lfcSE	stat	pvalue	padj
IFIT3	111.234	3.00549	0.292458	10.2767	8.98e-25	1.29e-20
RSAD2	77.4764	2.95426	0.402413	7.34136	2.11e-13	2.76e-10
IFIT1	54.8741	2.87343	0.38897	7.38729	1.5e-13	2.15e-10
IFI44L	151.341	2.8447	0.353755	8.04144	8.88e-16	1.96e-12
ISG15	29.7601	2.71594	0.338597	8.02115	1.05e-15	2.15e-12
IFIT2	45.2139	2.60896	0.302846	8.61483	7e-18	3.35e-14
MX1	166.474	2.40046	0.316413	7.58647	3.29e-14	5.24e-11
EDN1	30.0615	2.19349	0.398714	5.50143	3.77e-08	6.47e-06
OAS2	76.3513	2.16067	0.255416	8.45941	2.69e-17	8.56e-14
OAS3	107.367	1.97374	0.311963	6.32686	2.5e-10	1.46e-07
IFITM1	80.439	1.8226	0.24452	7.45378	9.07e-14	1.37e-10
OAS1	36.4143	1.68518	0.271281	6.21194	5.23e-10	2.54e-07
GBP1	161.494	1.42506	0.400372	3.55935	0.000371779	0.00296606
STAT1	200.701	1.38941	0.230522	6.02722	1.67e-09	5.83e-07
IFI35	16.0892	1.24736	0.257451	4.84504	1.27e-06	6.24e-05
STAT2	98.0301	1.04395	0.160476	6.50536	7.75e-11	5.7e-08
EIF2AK2	150.572	1.04207	0.226688	4.59692	4.29e-06	0.00014463
TAP1	57.7818	1.00097	0.275638	3.63146	0.000281827	0.00244207
PSMB8	26.939	0.964377	0.194346	4.96218	6.97e-07	4.23e-05
MT2A	119.624	0.954982	0.257516	3.70843	0.000208547	0.00198397
HLA-B	680.435	0.9487	0.225293	4.21095	2.54e-05	0.000489689
JAK2	52.9238	0.78912	0.161721	4.87953	1.06e-06	5.52e-05
PIK3R1	95.0846	0.766486	0.170844	4.48648	7.24e-06	0.000208455
PIK3C2A	97.1464	0.51653	0.146658	3.522	0.000428308	0.00325753
ADAR	254.03	0.765522	0.161641	4.73595	2.18036e-06	9.0083e-05
BST2	83.7013	0.807053	0.241824	3.33736	0.000845774	0.00518735
IFITM3	191.572	1.10785	0.184789	5.99523	2.03196e-09	6.69684e-07
TPR	155.396	0.60019	0.150745	3.98149	6.84857e-05	0.000950976
IRF7	18.9891	1.11538	0.287159	3.8842	0.000102669	0.00122935
The data is taken from Desai et al 2020 (PMID: 32766600)
Up-regulated SARS-CoV-2 genes in high viral load compared to low viral load of lungs autopsy of COVID-19 patients.
ORF1a	1444.81	9.27489	0.818629	11.3298	9.34371e-30	2.67912e-25
ORF1b	845.873	9.10878	0.920833	9.8919	4.51396e-23	3.23572e-19
S	489.437	8.76819	0.876532	10.0033	1.47444e-23	1.40922e-19

## Sheet: Down-regulated
Table S8B: Host response pathways associated down-regulated expressed genes in high viral load compared to low viral load of lungs autopsy of COVID-19 patients.
Gene	baseMean	log2FoldChange	lfcSE	stat	pvalue	padj
CAMK2B	3.24884	-5.00183	1.01594	-4.92337	8.5066e-07	4.9412e-05
CCR3	2.67014	-4.24294	1.12043	-3.7869	0.000152536	0.00160149
FGF17	2.36257	-4.00678	0.944875	-4.24054	2.22986e-05	0.000444932
IL1B	11.4863	-3.84544	0.623656	-6.16596	7.00557e-10	3.04349e-07
CXCL8	35.4946	-3.76753	0.467858	-8.05271	8.09783e-16	1.93491e-12
IL12B	1.74047	-3.48405	0.961327	-3.62421	0.000289844	0.00249196
TNF	1.30181	-3.01292	0.85108	-3.54011	0.000399962	0.0031113
CAMK2A	4.49683	-2.87437	0.767472	-3.74524	0.000180222	0.00179865
CYP27B1	1.5455	-2.84341	0.825953	-3.44258	0.000576198	0.00399742
BMP7	2.77526	-2.69713	0.85562	-3.15225	0.00162018	0.00826313
CYP24A1	5.31879	-2.59847	0.639797	-4.0614	4.87794e-05	0.000758488
MUC5B	62.3453	-2.31888	0.474092	-4.8912	1.00223e-06	5.32168e-05
IL6	16.9424	-2.26531	0.575674	-3.93506	8.31768e-05	0.00107342
MMP9	8.38271	-2.24257	0.456167	-4.91611	8.82788e-07	5.02593e-05
CYSLTR2	4.57924	-2.17094	0.675199	-3.21526	0.00130325	0.00708129
SFTPC	154.812	-1.89305	0.532644	-3.55406	0.000379327	0.00300537
HMOX1	69.3378	-1.30617	0.3014	-4.33369	1.46631e-05	0.000333679
PTGS2	23.3403	-1.23548	0.396529	-3.11573	0.00183489	0.00904829
TGFA	6.76518	-1.11914	0.356845	-3.1362	0.00171152	0.00859748
PRKCB	56.7074	-0.949432	0.231369	-4.10354	4.06871e-05	0.000671471
MAPK13	23.8259	-0.915489	0.186631	-4.90533	9.327e-07	5.1628e-05
VDR	21.1763	-0.789491	0.198805	-3.97117	7.15196e-05	0.000975122
PIK3C2B	34.4885	-0.715677	0.205445	-3.48354	0.000494827	0.00359104
PRKCA	25.1776	-0.646074	0.185299	-3.48665	0.000489104	0.00356484
RXRA	37.3887	-0.599896	0.162909	-3.68241	0.000231039	0.00213007
MECP2	47.4612	-0.373252	0.118177	-3.15842	0.00158628	0.00814427
The data is taken from Desai et al 2020 (PMID: 32766600)
